# Supplementary material
Source: publisher figshare collection journal article supplement (https://gsapubs.figshare.com/ndownloader/files/23316236)
Supplement: Supplementary file 1 [file 23316236]

## Sheet: My11 zircon
Grain		Pb207/U235	Pb207/U235 ±2σ	Pb206/U238	Pb206/U238 ±2σ	Pb206/U238 vs Pb207/U235		Pb206/U238	Pb206/U238 ±2σ	Pb207/Pb206	Pb207/Pb206 ±2σ	Pb206/U238 vs Pb207/Pb206		FinalAge207/235	FinalAge207/235 ±2σ	FinalAge206/238	FinalAge206/238 ±2σ	FinalAge207/206	FinalAge207/206 ±2σ		CONCORDIA CALCULATION												Concordia Age	+/-2s
My11_1		0.04	0.015	0.006	0.00053	0.48853		0.006	0.00053	0.046	0.017	0.007799		39	14	38.6	3.4	10	530		Concordia Age	+/-2s	MSWD	probability of concordance		0.1	Concordia Age	+/-2s	MSWD	probability of concordance			27.1346	0.574536
My11_2		0.0928	0.0073	0.01348	0.00051	0.056207		0.01348	0.00051	0.0496	0.004	0.33748		89.6	6.8	86.3	3.2	200	160		38.4722	3.25826	0.0358072	0.849914		0.1 = 10% threshold of discordancy	38.4722	3.25826	0.0358072	0.849914			28.3453	0.582236
My11_3		0.0571	0.0036	0.0083	0.00026	0.029984		0.0083	0.00026	0.0508	0.0034	0.41116		56.3	3.4	53.3	1.7	210	140		86.966	2.99035	1.0604	0.303124			86.966	2.99035	1.0604	0.303124			31.951	0.739296
My11_4		0.0975	0.0092	0.01482	0.00073	-0.045655		0.01482	0.00073	0.0485	0.0057	0.42465		94.2	8.5	94.8	4.6	100	210		53.8415	1.5167	2.66537	0.102554			53.8415	1.5167	2.66537	0.102554			38.315	1.13757
My11_5		0.0425	0.004	0.00655	0.00022	-0.11164		0.00655	0.00022	0.0483	0.0041	0.1153		42.2	3.9	42.1	1.4	140	170		94.7467	3.99261	0.00557736	0.940468			94.7467	3.99261	0.00557736	0.940468			38.4722	3.25826
My11_6		0.1211	0.0076	0.01385	0.00041	0.065213		0.01385	0.00041	0.062	0.0042	0.36344		115.6	6.9	88.7	2.6	660	140		42.1111	1.27271	0.00670543	0.934737			42.1111	1.27271	0.00670543	0.934737			39.0928	1.39207
My11_7		0.042	0.0022	0.00627	0.00014	0.11507		0.00627	0.00014	0.0487	0.0027	0.2854		41.7	2.2	40.28	0.89	140	100								91.5366	2.49402	56.6711	5.15162e-14			39.5611	0.891199
My11_8		0.1853	0.0061	0.02689	0.00065	0.2694		0.02689	0.00065	0.0498	0.002	0.45185		172.6	5.2	171.1	4.1	179	87		40.4671	0.858769	1.76827	0.183596			40.4671	0.858769	1.76827	0.183596			39.5829	0.927094
My11_9		0.0938	0.0044	0.01445	0.00033	-0.037191		0.01445	0.00033	0.0473	0.0026	0.47958		90.8	4.1	92.5	2.1	100	100		171.577	3.60768	0.297489	0.585461			171.577	3.60768	0.297489	0.585461			40.4671	0.858769
My11_10		0.0597	0.004	0.00928	0.0003	0.3295		0.00928	0.0003	0.0466	0.0032	0.25709		58.8	3.9	59.5	1.9	60	130		92.1692	1.83813	0.385514	0.534667			92.1692	1.83813	0.385514	0.534667			40.7442	0.609515
My11_11		0.953	0.019	0.1107	0.0023	0.5852		0.1107	0.0023	0.0621	0.0012	0.55421		679	9.9	676	13	671	41		59.4846	1.88647	0.132368	0.71599			59.4846	1.88647	0.132368	0.71599			41.0391	1.35567
My11_12		0.708	0.036	0.0871	0.0031	0.76104		0.0871	0.0031	0.0587	0.002	0.04769		540	21	538	18	538	78		679.168	9.73732	0.264892	0.606779			679.168	9.73732	0.264892	0.606779			41.0615	0.817585
My11_13		0.774	0.05	0.0943	0.0025	-0.11475		0.0943	0.0025	0.061	0.0042	0.46963		582	30	581	15	580	150		539.344	18.1957	0.543353	0.461047			539.344	18.1957	0.543353	0.461047			41.1304	0.755799
My11_14		0.0653	0.0057	0.00979	0.00027	-0.018967		0.00979	0.00027	0.0482	0.0041	0.091292		64	5.4	62.8	1.8	90	160		581.184	12.4533	0.00455943	0.946165			581.184	12.4533	0.00455943	0.946165			41.3609	0.885902
My11_15		0.0908	0.0082	0.01314	0.00079	0.020478		0.01314	0.00079	0.0509	0.0056	-0.024828		88.1	7.6	84.1	5.1	220	220		62.9401	1.63507	0.247308	0.618977			62.9401	1.63507	0.247308	0.618977			41.4742	0.951095
My11_16		0.0894	0.0042	0.01319	0.00027	0.10871		0.01319	0.00027	0.0485	0.0023	0.29303		86.8	3.9	84.5	1.7	145	92		85.3732	4.2409	0.816274	0.366272			85.3732	4.2409	0.816274	0.366272			41.5064	0.897058
My11_17		0.0483	0.005	0.0076	0.00024	0.085833		0.0076	0.00024	0.0479	0.0054	0.27308		47.7	4.9	48.8	1.5	50	190		84.7984	1.63268	1.44925	0.228649			84.7984	1.63268	1.44925	0.228649			41.8259	1.8891
My11_18		0.2327	0.0097	0.03416	0.00067	0.21631		0.03416	0.00067	0.0507	0.0021	0.27916		213.2	7.8	216.5	4.2	213	89		48.7434	1.49644	0.135691	0.712603			48.7434	1.49644	0.135691	0.712603			41.9833	1.86066
My11_19		0.126	0.03	0.0179	0.0012	0.18176		0.0179	0.0012	0.048	0.012	0.017045		115	27	114.5	7.5	50	390		215.897	3.98809	1.00999	0.314904			215.897	3.98809	1.00999	0.314904			42.1111	1.27271
My11_20		0.128	0.016	0.01858	0.00098	0.13419		0.01858	0.00098	0.05	0.0067	0.25065		120	15	118.6	6.2	110	230		114.542	7.56331	0.208836	0.647681			114.542	7.56331	0.208836	0.647681			42.1482	0.904889
My11_21		0.124	0.015	0.0185	0.00082	0.3149		0.0185	0.00082	0.0501	0.0068	0.46754		116	14	118.1	5.2	120	220		119.105	5.94503	0.235979	0.627126			119.105	5.94503	0.235979	0.627126			48.4168	0.939834
My11_22		0.113	0.012	0.01675	0.00061	0.16347		0.01675	0.00061	0.0498	0.0054	0.13643		107	11	107	3.9	120	190		118.184	5.17825	0.00657579	0.935369			118.184	5.17825	0.00657579	0.935369			48.7434	1.49644
My11_23		4.21	0.18	0.2965	0.007	0.60125		0.2965	0.007	0.1035	0.004	-0.058994		1674	36	1674	35	1681	73		107.191	3.79972	0.0869449	0.768098			107.191	3.79972	0.0869449	0.768098			49.0485	2.43189
My11_24		4.22	0.083	0.296	0.0059	0.094001		0.296	0.0059	0.1031	0.0019	0.69574		1676	16	1670	29	1673	35		1674.93	31.311	0.016961	0.896381			1674.93	31.311	0.016961	0.896381			49.5845	1.11393
My11_25		0.134	0.042	0.0192	0.0018	0.18814		0.0192	0.0018	0.06	0.018	0.19623		119	37	123	11	210	500		1676.54	14.8055	0.161106	0.688141			1676.54	14.8055	0.161106	0.688141			49.9322	1.96463
My11_26		0.127	0.018	0.01848	0.00075	0.025961		0.01848	0.00075	0.0514	0.0075	0.0085414		119	16	118	4.7	130	240		122.776	11.3106	0.0745265	0.784857			122.776	11.3106	0.0745265	0.784857			51.2142	1.8707
My11_27		0.0761	0.0084	0.01108	0.00043	0.1378		0.01108	0.00043	0.0473	0.0053	0.2725		73.7	7.9	71	2.8	130	200		118.286	4.58897	0.159547	0.689574			118.286	4.58897	0.159547	0.689574			51.2301	1.77261
My11_28		0.0705	0.0054	0.01076	0.00037	-0.0185		0.01076	0.00037	0.0486	0.0043	0.068649		68.8	5.1	69	2.4	70	150		71.2737	2.68445	0.732481	0.39208			71.2737	2.68445	0.732481	0.39208			51.6609	2.33124
My11_29		0.042	0.0045	0.00606	0.00022	0.16073		0.00606	0.00022	0.0486	0.0052	0.29021		42	4.3	39	1.4	150	190		69.0254	2.12896	0.00405726	0.949212			69.0254	2.12896	0.00405726	0.949212			52.6885	0.99669
My11_30		0.0672	0.0056	0.00945	0.00036	0.088091		0.00945	0.00036	0.05	0.0042	0.28769		65.8	5.3	60.6	2.3	240	170		39.0928	1.39207	1.65848	0.197809			39.0928	1.39207	1.65848	0.197809			53.8415	1.5167
My11_31		0.104	0.0062	0.01596	0.00033	0.13705		0.01596	0.00033	0.0477	0.003	0.24608		100.7	5.8	102.1	2.1	100	120								61.3493	2.17536	3.69358	0.0546223			55.2911	1.85469
My11_32		0.1017	0.0068	0.01584	0.00035	0.090051		0.01584	0.00035	0.047	0.0032	0.26131		97.8	6.2	101.3	2.2	70	120		101.94	2.04185	0.308617	0.57853			101.94	2.04185	0.308617	0.57853			59.4846	1.88647
My11_33		0.1074	0.0087	0.01609	0.00097	0.39379		0.01609	0.00097	0.0512	0.0049	0.51403		103.4	8	102.9	6.2	220	190		101.047	2.1486	0.845511	0.357825			101.047	2.1486	0.845511	0.357825			60.6244	2.01766
My11_34		0.108	0.011	0.0161	0.0011	0.5374		0.0161	0.0011	0.048	0.0044	0.22887		106.2	9.8	102.6	7.1	100	180		103.1	5.69363	0.0300187	0.862448			103.1	5.69363	0.0300187	0.862448			62.9401	1.63507
My11_35		0.0898	0.0083	0.0132	0.00037	0.26458		0.0132	0.00037	0.05	0.0047	0.15809		86.9	7.7	84.5	2.4	190	180		103.131	6.86539	0.0736493	0.786096			103.131	6.86539	0.0736493	0.786096			64.3149	2.14508
My11_36		0.0909	0.0066	0.01322	0.00039	0.010969		0.01322	0.00039	0.0506	0.0039	0.32798		88	6.1	84.7	2.5	200	140		84.5718	2.35386	0.553634	0.456837			84.5718	2.35386	0.553634	0.456837			65.3835	1.58302
My11_37		0.2047	0.0072	0.02912	0.00081	0.48594		0.02912	0.00081	0.0519	0.002	0.3776		188.9	6.1	185	5.1	303	84		85.1673	2.31161	1.2384	0.265779			85.1673	2.31161	1.2384	0.265779			65.4686	1.32757
My11_38		0.0394	0.0016	0.00617	0.00015	0.21909		0.00617	0.00015	0.0465	0.0018	0.22747		39.2	1.5	39.66	0.94	21	69		186.37	4.71606	2.00689	0.156586			186.37	4.71606	2.00689	0.156586			66.1584	1.24334
My11_39		0.0413	0.0042	0.00578	0.0002	-0.03865		0.00578	0.0002	0.053	0.006	0.022266		40.9	4.1	37.2	1.3	230	200		39.5611	0.891199	0.252867	0.615064			39.5611	0.891199	0.252867	0.615064			66.8343	1.23004
My11_40		0.0697	0.0068	0.01049	0.00049	0.15094		0.01049	0.00049	0.0493	0.0052	0.32374		69.5	6.8	67.2	3.1	160	200								37.538	1.21009	3.28708	0.0698272			67.0269	1.3088
My11_41		0.0858	0.0033	0.01324	0.00027	0.1801		0.01324	0.00027	0.0474	0.0019	0.27047		83.4	3.1	84.8	1.7	86	77		67.4402	2.9631	0.115333	0.734153			67.4402	2.9631	0.115333	0.734153			67.4402	2.9631
My11_42		0.0928	0.006	0.01352	0.00033	0.069093		0.01352	0.00033	0.0485	0.0031	0.2596		89.7	5.6	86.6	2.1	140	120		84.5615	1.60584	0.551004	0.457908			84.5615	1.60584	0.551004	0.457908			67.5276	1.58567
My11_43		0.0917	0.0043	0.01408	0.00032	0.0053703		0.01408	0.00032	0.0473	0.0025	0.48107		89.5	3.9	90.1	2.1	90	100		86.946	2.00819	1.47223	0.224994			86.946	2.00819	1.47223	0.224994			68.0362	1.67065
My11_44		0.1373	0.0055	0.01203	0.00031	0.0065241		0.01203	0.00031	0.0838	0.0042	-0.0090966		130.4	4.9	77.1	2	1215	95		89.9182	1.8186	0.21849	0.640193			89.9182	1.8186	0.21849	0.640193			68.4386	1.79419
My11_45		0.102	0.01	0.01527	0.00052	0.2898		0.01527	0.00052	0.0473	0.0042	0.029475		98.4	9.2	97.7	3.3	100	170								84.0253	1.84733	395.173	6.18974e-88			68.4476	1.71939
My11_46		0.0501	0.0031	0.00772	0.00019	-0.033157		0.00772	0.00019	0.0471	0.003	0.23999		49.5	3	49.6	1.2	60	110		97.7175	3.29492	0.0440218	0.833813			97.7175	3.29492	0.0440218	0.833813			68.7637	1.15647
My11_47		0.0733	0.0041	0.01096	0.00031	0.28987		0.01096	0.00031	0.0478	0.0026	0.21506		71.7	3.9	70.3	2	90	110		49.5845	1.11393	0.00144479	0.969679			49.5845	1.11393	0.00144479	0.969679			69.0254	2.12896
My11_48		0.0597	0.0068	0.00857	0.0003	0.029311		0.00857	0.0003	0.0502	0.0061	0.29333		58.3	6.4	55	1.9	160	200		70.449	1.92803	0.667677	0.413863			70.449	1.92803	0.667677	0.413863			69.4448	2.20875
My11_49		0.0678	0.0045	0.01017	0.00026	0.07146		0.01017	0.00026	0.0486	0.0035	0.3054		66.3	4.3	65.2	1.7	140	130		55.2911	1.85469	1.31332	0.251794			55.2911	1.85469	1.31332	0.251794			70.0086	2.00782
My11_50		0.1206	0.0079	0.01823	0.00069	0.10032		0.01823	0.00069	0.0481	0.0034	0.42732		115.3	7.2	116.4	4.4	120	140		65.3835	1.58302	0.379682	0.537773			65.3835	1.58302	0.379682	0.537773			70.449	1.92803
My11_51		0.053	0.0055	0.00773	0.00032	0.092674		0.00773	0.00032	0.0486	0.0052	0.35594		52.3	5.3	49.6	2	140	200		116.249	3.88835	0.0444749	0.832973			116.249	3.88835	0.0444749	0.832973			71.2737	2.68445
My11_52		0.1018	0.0077	0.01484	0.00045	-0.029463		0.01484	0.00045	0.0492	0.004	0.34712		98.6	7.2	95	2.8	150	150		49.9322	1.96463	1.03116	0.309887			49.9322	1.96463	1.03116	0.309887			72.574	1.69165
My11_53		0.0411	0.0015	0.00646	0.00015	0.24817		0.00646	0.00015	0.0462	0.0017	0.38195		40.9	1.4	41.49	0.96	41	74		95.4706	2.62609	0.806265	0.369227			95.4706	2.62609	0.806265	0.369227			73.1463	2.78543
My11_54		0.0348	0.0021	0.00513	0.00016	0.27525		0.00513	0.00016	0.0483	0.0027	-0.083702		34.7	2.1	33	1	120	110		41.3609	0.885902	0.633102	0.42622			41.3609	0.885902	0.633102	0.42622			78.3934	2.16249
My11_55		0.132	0.019	0.0188	0.0012	0.016317		0.0188	0.0012	0.052	0.0086	0.42762		124	17	120.2	7.9	130	270								33.1844	1.00034	2.95219	0.0857611			81.7782	1.8115
My11_56		0.0858	0.0051	0.00831	0.00025	0.3396		0.00831	0.00025	0.0744	0.0044	0.13557		83.3	4.8	53.3	1.6	1040	120		121.003	6.98272	0.393156	0.530645			121.003	6.98272	0.393156	0.530645			82.7275	1.86036
My11_57		0.0722	0.0033	0.01065	0.00021	-0.15292		0.01065	0.00021	0.0478	0.0024	0.5123		70.7	3.1	68.3	1.3	90	97								53.1921	1.5992	176.289	3.13208e-40			82.8984	1.80885
My11_58		0.0899	0.0035	0.01385	0.00027	0.1299		0.01385	0.00027	0.0459	0.0019	0.35771		87.3	3.2	88.7	1.7	29	78		68.7637	1.15647	1.93189	0.164552			68.7637	1.15647	1.93189	0.164552			83.4658	1.74901
My11_59		0.0804	0.0046	0.01223	0.00037	0.11353		0.01223	0.00037	0.0472	0.0031	0.3954		78.4	4.3	78.3	2.4	80	120		88.4386	1.59575	0.523148	0.469502			88.4386	1.59575	0.523148	0.469502			83.5331	1.66285
My11_60		0.0678	0.0053	0.01063	0.00027	0.089336		0.01063	0.00027	0.046	0.0037	0.19455		66.3	5.1	68.1	1.7	70	140		78.3934	2.16249	0.00463602	0.945715			78.3934	2.16249	0.00463602	0.945715			84.2977	2.80601
My11_61		0.0414	0.002	0.00638	0.00022	0.47098		0.00638	0.00022	0.0464	0.0022	0.2136		41.2	1.9	41	1.4	39	93		68.0362	1.67065	0.360574	0.548188			68.0362	1.67065	0.360574	0.548188			84.5402	1.72425
My11_62		0.1047	0.0094	0.00951	0.00024	0.33191		0.00951	0.00024	0.0793	0.0071	-0.013864		100.5	8.6	61	1.5	1110	180		41.0391	1.35567	0.0462473	0.829727			41.0391	1.35567	0.0462473	0.829727			84.5615	1.60584
My11_63		0.1072	0.0058	0.01595	0.00065	0.29846		0.01595	0.00065	0.0495	0.0034	0.1352		103.3	5.3	102	4.1	160	140								59.7882	1.51229	90.3845	1.96092e-21			84.5718	2.35386
My11_64		0.0943	0.0082	0.01403	0.00063	0.072826		0.01403	0.00063	0.0478	0.0042	0.34932		91.2	7.6	89.8	4	90	170		102.46	3.69133	0.240233	0.624038			102.46	3.69133	0.240233	0.624038			84.7984	1.63268
My11_65		0.0684	0.0034	0.01071	0.00028	0.28132		0.01071	0.00028	0.0465	0.0023	0.1869		67.1	3.2	68.6	1.8	41	98		90.1495	3.64748	0.16349	0.685963			90.1495	3.64748	0.16349	0.685963			85.1673	2.31161
My11_66		0.1314	0.0061	0.01965	0.00053	0.246		0.01965	0.00053	0.0482	0.0023	0.32981		125.1	5.5	125.4	3.4	110	92		68.4476	1.71939	0.859589	0.353854			68.4476	1.71939	0.859589	0.353854			85.3732	4.2409
My11_67		0.0444	0.0042	0.00649	0.0003	0.21723		0.00649	0.0003	0.0492	0.0047	0.29705		44.1	4.1	41.7	1.9	140	190		125.425	3.13661	0.00097509	0.975089			125.425	3.13661	0.00097509	0.975089			86.946	2.00819
My11_68		0.071	0.0036	0.01013	0.00028	0.18894		0.01013	0.00028	0.0502	0.0027	0.31396		69.5	3.4	64.9	1.8	230	110		41.9833	1.86066	1.36578	0.242539			41.9833	1.86066	1.36578	0.242539			86.966	2.99035
My11_69		0.1762	0.0061	0.02557	0.0007	0.61072		0.02557	0.0007	0.0493	0.0012	0.35664		164.6	5.3	162.8	4.4	158	53								65.7301	1.69338	6.94149	0.00842191			88.1071	3.12133
My11_70		0.1363	0.0041	0.02027	0.00032	0.3244		0.02027	0.00032	0.0485	0.0015	0.21533		130	3.6	129.4	2	126	61		163.321	4.23643	0.866472	0.351934			163.321	4.23643	0.866472	0.351934			88.4386	1.59575
My11_71		0.042	0.0021	0.00657	0.00015	0.11247		0.00657	0.00015	0.0463	0.0024	0.31714		41.7	2.1	42.22	0.94	49	96		129.413	1.9697	0.0454774	0.831129			129.413	1.9697	0.0454774	0.831129			89.3193	1.72963
My11_72		0.1259	0.0094	0.01882	0.00045	0.15358		0.01882	0.00045	0.0494	0.0038	0.14665		120.3	8.6	120.2	2.8	120	140		42.1482	0.904889	0.165438	0.684198			42.1482	0.904889	0.165438	0.684198			89.9182	1.8186
My11_73		0.0955	0.007	0.01425	0.00054	0.25334		0.01425	0.00054	0.048	0.0036	0.31917		92.3	6.5	91.2	3.5	100	140		120.207	2.8027	0.00249626	0.960152			120.207	2.8027	0.00249626	0.960152			90.1495	3.64748
My11_74		0.0876	0.0067	0.00985	0.00031	-0.012346		0.00985	0.00031	0.0651	0.0051	0.35971		85.3	6.3	63.2	2	660	170		91.4146	3.30235	0.184026	0.667936			91.4146	3.30235	0.184026	0.667936			90.2443	1.41008
My11_75		0.2063	0.0045	0.02959	0.00061	0.61246		0.02959	0.00061	0.05001	0.00094	0.36668		190.3	3.8	187.9	3.8	191	42								65.2066	1.8839	44.1734	3.00545e-11			90.5995	2.17237
My11_76		0.0261	0.0015	0.00425	0.0001	-0.06671		0.00425	0.0001	0.0461	0.003	0.46419		26.1	1.4	27.32	0.64	30	110		189.232	3.42074	2.13943	0.143555			189.232	3.42074	2.13943	0.143555			90.8855	1.78897
My11_77		4.48	0.1	0.3073	0.0095	0.76748		0.3073	0.0095	0.1053	0.002	0.77472		1727	18	1724	46	1727	39		27.1346	0.574536	2.02279	0.154954			27.1346	0.574536	2.02279	0.154954			91.2643	3.13402
My11_78		0.189	0.004	0.02751	0.00051	0.51612		0.02751	0.00051	0.04954	0.00095	0.39043		175.6	3.4	174.9	3.2	173	42		1727.24	16.3076	5.84922e-05	0.993898			1727.24	16.3076	5.84922e-05	0.993898			91.4146	3.30235
My11_79		0.2628	0.0098	0.0368	0.0013	0.64971		0.0368	0.0013	0.0514	0.0017	0.42075		236.6	7.9	232.9	8.2	248	73		175.304	2.8764	0.257241	0.612022			175.304	2.8764	0.257241	0.612022			92.1692	1.83813
My11_80		3.75	0.079	0.2779	0.0058	0.14335		0.2779	0.0058	0.0984	0.0019	0.00057691		1581	17	1580	29	1589	37		235.075	7.2538	1.39379	0.237766			235.075	7.2538	1.39379	0.237766			92.7023	1.59371
My11_81		0.086	0.0066	0.01321	0.00028	0.024321		0.01321	0.00028	0.0471	0.0039	0.34492		85.2	6.2	84.6	1.8	90	140		1581.82	15.5655	0.0070917	0.932888			1581.82	15.5655	0.0070917	0.932888			92.7879	2.6015
My11_82		0.0715	0.0035	0.01074	0.00048	-0.037272		0.01074	0.00048	0.0473	0.0036	0.59061		70.1	3.3	68.9	3	70	140		84.5402	1.72425	0.0675617	0.794921			84.5402	1.72425	0.0675617	0.794921			94.1889	3.01788
My11_83		0.0736	0.003	0.01134	0.00028	0.30685		0.01134	0.00028	0.0474	0.002	0.25904		72.1	2.8	72.7	1.8	74	80		69.4448	2.20875	0.2986	0.584761			69.4448	2.20875	0.2986	0.584761			94.7467	3.99261
My11_84		0.0637	0.0098	0.0081	0.00038	-0.22484		0.0081	0.00038	0.059	0.011	0.53499		62.5	9.4	52	2.4	430	350		72.574	1.69165	0.165861	0.683817			72.574	1.69165	0.165861	0.683817			95.4706	2.62609
My11_85		0.0738	0.003	0.01077	0.00024	0.17917		0.01077	0.00024	0.0494	0.0023	0.33657		72.2	2.9	69	1.5	161	98								53.1334	2.17817	4.37959	0.0363717			95.911	3.0872
My11_86		0.0432	0.0025	0.0064	0.00017	-0.10905		0.0064	0.00017	0.0485	0.0029	0.32883		43.1	2.5	41.1	1.1	170	110								69.6295	1.43922	4.74221	0.0294313			96.0929	2.48886
My11_87		0.0682	0.0029	0.0103	0.0002	0.23191		0.0103	0.0002	0.0483	0.0021	0.28993		66.9	2.7	66.1	1.3	117	93		41.4742	0.951095	1.71705	0.190073			41.4742	0.951095	1.71705	0.190073			97.7175	3.29492
My11_88		0.0471	0.003	0.00688	0.00022	0.27556		0.00688	0.00022	0.0493	0.0031	0.30285		46.7	2.9	44.2	1.4	160	130		66.1584	1.24334	0.455755	0.499615			66.1584	1.24334	0.455755	0.499615			98.9228	2.26605
My11_89		0.0537	0.0031	0.00782	0.00026	0.1391		0.00782	0.00026	0.0502	0.003	0.45681		53.1	3	50.2	1.7	210	110								44.4628	1.37742	3.12555	0.0770737			101.047	2.1486
My11_90		0.0706	0.0037	0.01042	0.00021	0.15901		0.01042	0.00021	0.0493	0.0026	0.17862		69.5	3.5	66.8	1.4	170	100								50.7964	1.53364	3.24986	0.0714294			101.94	2.04185
My11_91		0.0525	0.0059	0.00804	0.00038	0.13438		0.00804	0.00038	0.0481	0.0055	0.16541		51.8	5.7	51.6	2.4	90	210		67.0269	1.3088	1.88917	0.169296			67.0269	1.3088	1.88917	0.169296			102.46	3.69133
My11_92		0.0944	0.0062	0.01346	0.00043	0.047165		0.01346	0.00043	0.0505	0.0034	0.35894		91.4	5.7	86.2	2.7	210	140		51.6609	2.33124	0.0128558	0.909727			51.6609	2.33124	0.0128558	0.909727			103.1	5.69363
My11_93		0.765	0.021	0.0933	0.0017	0.34823		0.0933	0.0017	0.0592	0.0014	0.32166		576	12	576	10	576	54								87.1166	2.51666	2.97599	0.0845084			103.131	6.86539
My11_94		0.775	0.012	0.0937	0.0012	0.39928		0.0937	0.0012	0.06005	0.00092	0.35574		582.1	6.9	577.1	6.9	605	32		575.694	8.93269	0.08537	0.770148			575.694	8.93269	0.08537	0.770148			107.191	3.79972
My11_95		0.1105	0.0045	0.00829	0.0002	0.08152		0.00829	0.0002	0.0974	0.0046	0.47582		106.2	4.1	53.2	1.3	1538	92		580.113	5.85458	1.8512	0.173644			580.113	5.85458	1.8512	0.173644			114.542	7.56331
My11_96		0.0417	0.0026	0.00646	0.00015	-0.0072443		0.00646	0.00015	0.0473	0.0032	0.32885		41.4	2.5	41.54	0.98	100	120								56.5508	1.25079	610.604	8.26754e-135			116.249	3.88835
My11_97		0.0945	0.006	0.01423	0.00058	0.042554		0.01423	0.00058	0.0493	0.0029	-0.30091		91.3	5.4	91.1	3.6	134	89		41.5064	0.897058	0.000408046	0.983884			41.5064	0.897058	0.000408046	0.983884			118.184	5.17825
My11_98		0.1012	0.0082	0.01498	0.00042	-0.035171		0.01498	0.00042	0.0485	0.0041	0.37904		97.7	7.6	95.8	2.7	130	170		91.2643	3.13402	0.0336805	0.854388			91.2643	3.13402	0.0336805	0.854388			118.286	4.58897
My11_99		0.0859	0.0048	0.01304	0.00027	0.11977		0.01304	0.00027	0.0475	0.0027	0.19968		83.9	4.4	83.5	1.7	90	110		96.0929	2.48886	0.250953	0.616405			96.0929	2.48886	0.250953	0.616405			118.424	2.97849
My11_100		2.117	0.032	0.1961	0.0036	0.4542		0.1961	0.0036	0.0787	0.0014	0.61639		1155	11	1155	19	1154	34		83.5331	1.66285	0.00475122	0.945046			83.5331	1.66285	0.00475122	0.945046			119.105	5.94503
My11_101		0.0942	0.0055	0.01414	0.00035	0.21602		0.01414	0.00035	0.0489	0.003	-0.034301		91.6	5.2	90.5	2.2	160	120		1154.36	10.484	7.69886e-06	0.997786			1154.36	10.484	7.69886e-06	0.997786			120.207	2.8027
My11_102		0.124	0.0051	0.01852	0.00054	0.18758		0.01852	0.00054	0.0484	0.0024	0.50971		118.5	4.6	118.3	3.4	117	98		90.5995	2.17237	0.122449	0.726393			90.5995	2.17237	0.122449	0.726393			121.003	6.98272
My11_103		0.15	0.011	0.01932	0.00059	0.046891		0.01932	0.00059	0.0566	0.0043	0.3272		140.5	9.4	123.3	3.8	420	150		118.424	2.97849	0.0232402	0.878834			118.424	2.97849	0.0232402	0.878834			122.776	11.3106
My11_104		0.0391	0.0026	0.00617	0.00015	0.10351		0.00617	0.00015	0.0458	0.0029	0.21041		38.9	2.6	39.66	0.97	40	120								125.47	3.5428	12.9425	0.000321212			125.425	3.13661
My11_105		0.0536	0.0021	0.00819	0.00018	-0.011338		0.00819	0.00018	0.047	0.0021	0.1106		52.9	2.1	52.6	1.2	63	83		39.5829	0.927094	0.291038	0.589556			39.5829	0.927094	0.291038	0.589556			125.979	8.09777
My11_106		0.0838	0.0044	0.01299	0.00032	-0.024549		0.01299	0.00032	0.0466	0.0028	0.49441		81.6	4.1	83.2	2	80	120		52.6885	0.99669	0.13802	0.710257			52.6885	0.99669	0.13802	0.710257			129.413	1.9697
My11_107		0.1775	0.0056	0.02568	0.00085	0.5644		0.02568	0.00085	0.0494	0.0012	0.44007		165.8	4.8	163.4	5.3	163	55		82.8984	1.80885	0.411143	0.52139			82.8984	1.80885	0.411143	0.52139			162.151	6.82608
My11_108		0.1793	0.0027	0.0261	0.00047	0.83817		0.0261	0.00047	0.04953	0.00069	0.43771		167.8	2.2	166.1	3	170	31		164.957	4.47081	1.0545	0.304472			164.957	4.47081	1.0545	0.304472			163.321	4.23643
My11_109		0.058	0.0062	0.00725	0.00031	0.00039523		0.00725	0.00031	0.0611	0.0074	0.40509		57	6	46.6	2	550	240								167.609	2.32853	2.76004	0.0966461			164.957	4.47081
My11_110		0.042	0.0048	0.00651	0.0003	0.22867		0.00651	0.0003	0.047	0.0057	0.16942		41.6	4.7	41.8	1.9	110	220								47.6222	1.88442	11.499	0.000696347			171.577	3.60768
My11_111		0.0953	0.0028	0.01414	0.00029	0.48852		0.01414	0.00029	0.0488	0.0012	0.2858		92.3	2.6	90.5	1.8	133	54		41.8259	1.8891	0.000570203	0.980949			41.8259	1.8891	0.000570203	0.980949			175.28	3.70311
My11_112		0.427	0.01	0.0574	0.0013	0.41738		0.0574	0.0013	0.054	0.0012	0.55341		360	7.4	359.9	7.7	358	50		90.8855	1.78897	2.67017	0.102245			90.8855	1.78897	2.67017	0.102245			175.304	2.8764
My11_113		0.0794	0.0084	0.01138	0.00044	0.2367		0.01138	0.00044	0.0499	0.0055	-0.11132		77.2	7.9	72.9	2.8	220	210		360.532	6.30073	0.0936141	0.759632			360.532	6.30073	0.0936141	0.759632			186.37	4.71606
My11_114		0.1031	0.0085	0.01488	0.00053	-0.007063		0.01488	0.00053	0.0517	0.0049	-0.0080983		98.6	7.8	95.2	3.4	150	160		73.1463	2.78543	1.43018	0.231735			73.1463	2.78543	1.43018	0.231735			189.232	3.42074
My11_115		0.0588	0.0074	0.01011	0.0004	0.045916		0.01011	0.0004	0.0413	0.0055	0.24133		57.3	7.1	64.8	2.6	-110	210		95.911	3.0872	1.06692	0.301642			95.911	3.0872	1.06692	0.301642			215.897	3.98809
My11_116		12.06	0.24	0.499	0.015	0.45429		0.499	0.015	0.1759	0.0049	0.68506		2608	19	2607	64	2612	46								64.1358	2.43493	3.39789	0.0652797			235.075	7.2538
My11_117		0.7	0.015	0.0882	0.0012	0.24776		0.0882	0.0012	0.0576	0.0013	0.43159		539.4	8.8	544.8	7.2	494	49		2609.06	18.7271	0.000200735	0.988696			2609.06	18.7271	0.000200735	0.988696			360.532	6.30073
My11_118		0.0483	0.0019	0.00756	0.00016	0.12525		0.00756	0.00016	0.0464	0.0019	0.34299		48	1.8	48.6	1	43	77		542.735	6.20355	1.48612	0.222819			542.735	6.20355	1.48612	0.222819			539.344	18.1957
My11_119		0.04	0.0024	0.00583	0.00019	0.08244		0.00583	0.00019	0.05	0.0034	0.37605		39.8	2.4	37.5	1.2	180	140		48.4168	0.939834	0.434009	0.510028			48.4168	0.939834	0.434009	0.510028			542.735	6.20355
My11_120		0.0993	0.0032	0.01117	0.00023	0.09579		0.01117	0.00023	0.0644	0.0023	0.46673		96.3	2.9	71.6	1.5	720	79								37.9235	1.11598	3.39128	0.0655419			575.694	8.93269
My11_121		0.0419	0.0016	0.00632	0.0001	0.081333		0.00632	0.0001	0.0477	0.0018	0.13374		41.7	1.5	40.59	0.67	90	72								75.7208	1.3661	234.899	5.0946e-53			580.113	5.85458
My11_122		0.0927	0.0047	0.01393	0.0003	-0.031075		0.01393	0.0003	0.0485	0.0028	0.44628		89.8	4.3	89.2	1.9	140	110		40.7442	0.609515	1.68648	0.194065			40.7442	0.609515	1.68648	0.194065			581.184	12.4533
My11_123		0.0672	0.0028	0.0102	0.00021	0.36678		0.0102	0.00021	0.0486	0.0019	0.15588		65.9	2.6	65.4	1.3	124	77		89.3193	1.72963	0.120318	0.72869			89.3193	1.72963	0.120318	0.72869			679.168	9.73732
My11_124		0.0426	0.0019	0.00637	0.00013	0.25643		0.00637	0.00013	0.0484	0.0021	0.064627		42.3	1.8	40.93	0.81	117	85		65.4686	1.32757	0.243294	0.621837			65.4686	1.32757	0.243294	0.621837			976.832	15.5764
My11_125		0.16	0.047	0.0196	0.0013	0.021151		0.0196	0.0013	0.055	0.016	-0.09378		148	41	124.9	8	390	560		41.0615	0.817585	2.43787	0.118437			41.0615	0.817585	2.43787	0.118437			1154.36	10.484
My11_126		0.0851	0.0043	0.01304	0.00028	0.2491		0.01304	0.00028	0.0473	0.0023	0.14863		82.7	4	83.5	1.8	111	97		125.979	8.09777	1.46394	0.226304			125.979	8.09777	1.46394	0.226304			1378.35	20.6399
My11_127		0.0387	0.0014	0.00594	0.00019	0.57679		0.00594	0.00019	0.047	0.0016	0.29839		38.7	1.3	38.2	1.2	71	67		83.4658	1.74901	0.0879003	0.766864			83.4658	1.74901	0.0879003	0.766864			1581.82	15.5655
My11_128		0.0948	0.0094	0.01368	0.00052	0.027153		0.01368	0.00052	0.0493	0.0048	0.28218		91.5	8.7	87.6	3.3	170	180		38.315	1.13757	0.392472	0.531003			38.315	1.13757	0.392472	0.531003			1674.93	31.311
My11_129		0.0532	0.0046	0.00794	0.00031	0.096021		0.00794	0.00031	0.05	0.0045	0.32611		52.5	4.4	51	2	170	170		88.1071	3.12133	0.893859	0.344434			88.1071	3.12133	0.893859	0.344434			1676.54	14.8055
My11_130		0.0912	0.0037	0.01413	0.00023	0.14699		0.01413	0.00023	0.0475	0.002	0.28229		88.5	3.4	90.5	1.5	89	80		51.2142	1.8707	0.495123	0.481651			51.2142	1.8707	0.495123	0.481651			1727.24	16.3076
My11_131		0.0502	0.0042	0.0076	0.00042	0.20052		0.0076	0.00042	0.046	0.0032	0.63496		49.7	4	48.8	2.7	20	140		90.2443	1.41008	1.06973	0.301007			90.2443	1.41008	1.06973	0.301007			2609.06	18.7271
My11_132		1.617	0.04	0.1632	0.006	0.47387		0.1632	0.006	0.073	0.0024	0.54322		976	16	974	33	1002	66		49.0485	2.43189	0.177471	0.673556			49.0485	2.43189	0.177471	0.673556
My11_133		0.0688	0.004	0.01053	0.00025	0.30931		0.01053	0.00025	0.0473	0.0026	0.11749		67.4	3.8	67.5	1.6	70	100		976.832	15.5764	0.0244338	0.875786			976.832	15.5764	0.0244338	0.875786
My11_134		0.0295	0.0016	0.004379	9.7e-05	0.012326		0.004379	9.7e-05	0.0478	0.0026	0.40434		29.5	1.5	28.17	0.62	90	100		67.5276	1.58567	0.000353542	0.984998			67.5276	1.58567	0.000353542	0.984998
My11_135		0.1015	0.0056	0.01548	0.00037	0.18386		0.01548	0.00037	0.0481	0.0028	0.19208		97.8	5.2	99	2.4	110	110		28.3453	0.582236	2.56225	0.109442			28.3453	0.582236	2.56225	0.109442
My11_136		0.122	0.011	0.01113	0.00031	0.024208		0.01113	0.00031	0.0776	0.006	0.028479		112.9	8.3	71.4	2	970	140		98.9228	2.26605	0.108224	0.742175			98.9228	2.26605	0.108224	0.742175
My11_137		0.0414	0.002	0.0064	0.00012	0.20503		0.0064	0.00012	0.0466	0.0022	0.12793		41.2	2	41.12	0.78	47	91								72.7823	1.95077	77.9179	1.07416e-18
My11_138		0.0984	0.0074	0.01469	0.0005	0.13709		0.01469	0.0005	0.0501	0.0036	0.28452		94.9	6.8	94	3.2	190	140		41.1304	0.755799	0.00438417	0.947208			41.1304	0.755799	0.00438417	0.947208
My11_139		0.0692	0.0032	0.0104	0.0002	0.14105		0.0104	0.0002	0.0483	0.0024	0.27842		67.8	3.1	66.7	1.3	133	98		94.1889	3.01788	0.130379	0.71804			94.1889	3.01788	0.130379	0.71804
My11_140		0.475	0.057	0.01774	0.00064	0.92722		0.01774	0.00064	0.178	0.015	-0.68423		369	34	113.3	4	2500	140		66.8343	1.23004	0.631654	0.426749			66.8343	1.23004	0.631654	0.426749
My11_141		0.0748	0.0055	0.01088	0.00032	0.21086		0.01088	0.00032	0.0486	0.0035	0.244		73.6	5.1	69.7	2.1	130	130								88.2939	1.64321	181.857	1.9058e-41
My11_142		0.0869	0.0059	0.01315	0.00048	0.12672		0.01315	0.00048	0.0476	0.0033	0.38201		84.5	5.5	84.2	3.1	90	130		70.0086	2.00782	1.8149	0.177922			70.0086	2.00782	1.8149	0.177922
My11_143		0.056	0.002	0.00831	0.00021	0.45719		0.00831	0.00021	0.0492	0.0014	0.19443		55.3	1.9	53.3	1.4	156	61		84.2977	2.80601	0.0174747	0.894832			84.2977	2.80601	0.0174747	0.894832
My11_144		0.0679	0.0046	0.01073	0.00031	-0.011867		0.01073	0.00031	0.0464	0.0035	0.41431		66.4	4.3	68.8	2	40	130								53.7394	1.29711	4.96453	0.0258724
My11_145		0.0553	0.0049	0.00787	0.00031	-0.081053		0.00787	0.00031	0.0525	0.0045	0.39958		54.6	4.7	50.6	2	280	180		68.4386	1.79419	0.757244	0.384193			68.4386	1.79419	0.757244	0.384193
My11_146		0.0319	0.0019	0.00497	0.00012	0.12072		0.00497	0.00012	0.0475	0.0029	0.29357		32.1	1.8	31.98	0.79	100	120		51.2301	1.77261	2.444	0.117975			51.2301	1.77261	2.444	0.117975
My11_147		0.1907	0.0052	0.02721	0.00074	0.32932		0.02721	0.00074	0.0509	0.0013	0.20718		177	4.4	173	4.6	217	51		31.951	0.739296	0.00593207	0.938608			31.951	0.739296	0.00593207	0.938608
My11_148		2.892	0.079	0.2355	0.0054	0.67231		0.2355	0.0054	0.0871	0.0018	0.35054		1377	21	1362	28	1361	41		175.28	3.70311	2.49605	0.114132			175.28	3.70311	2.49605	0.114132
My11_149		0.13	0.011	0.01198	0.00049	0.12986		0.01198	0.00049	0.0788	0.0076	-0.096907		123.6	9.8	76.8	3.1	1070	210		1378.35	20.6399	2.48054	0.115263			1378.35	20.6399	2.48054	0.115263
My11_150		0.096	0.0055	0.01448	0.00049	-0.047023		0.01448	0.00049	0.0478	0.0028	0.035244		92.9	5	92.7	3.1	100	110								79.2545	3.0752	86.4391	1.44106e-20
My11_151		0.0964	0.0043	0.01447	0.00026	0.13783		0.01447	0.00026	0.0479	0.0021	0.091733		93.2	4	92.6	1.7	96	83		92.7879	2.6015	0.0174354	0.89495			92.7879	2.6015	0.0174354	0.89495
My11_152		0.172	0.023	0.0255	0.0012	-0.090161		0.0255	0.0012	0.0512	0.0075	0.40177		165	21	161.9	7.6	160	250		92.7023	1.59371	0.166551	0.683195			92.7023	1.59371	0.166551	0.683195
My11_153		0.115	0.0044	0.01418	0.00027	0.17363		0.01418	0.00027	0.058	0.0023	0.29603		110.7	4	90.7	1.7	505	87		162.151	6.82608	0.0113795	0.915047			162.151	6.82608	0.0113795	0.915047
My11_154		0.0649	0.0058	0.00937	0.00034	-0.0073614		0.00937	0.00034	0.0512	0.0051	0.077297		63.4	5.5	60.1	2.1	130	170								92.7868	1.6665	92.4291	6.97799e-22
My11_155		0.0685	0.0065	0.01	0.00034	0.19736		0.01	0.00034	0.0514	0.0051	0.21479		67.1	6.2	64.2	2.2	220	200		60.6244	2.01766	1.56103	0.211515			60.6244	2.01766	1.56103	0.211515
My11_156		0.0893	0.0058	0.01286	0.0003	0.11816		0.01286	0.0003	0.0501	0.0035	0.1183		86.5	5.4	82.4	1.9	140	130		64.3149	2.14508	1.04049	0.307707			64.3149	2.14508	1.04049	0.307707
My11_157		0.0829	0.0046	0.01278	0.00029	0.2329		0.01278	0.00029	0.0483	0.0027	0.17102		80.6	4.3	81.9	1.8	110	110		82.7275	1.86036	2.62467	0.105215			82.7275	1.86036	2.62467	0.105215
																					81.7782	1.8115	0.216485	0.641731			81.7782	1.8115	0.216485	0.641731

## Sheet: PlotDat2
Source sheet	My11 titanite	0.2	27.7238	1	25.0157	3.34526	0.85	21.6704
Plot name	Average2	22.8	27.7238	2	25.428	5.13625	1.15	21.6704
Plot Type	15			3	25.834	6.5268	1.15	28.3609
1st free col	8			4	25.9616	5.05384	0.85	28.3609
Sigma Level	2			5	26.3103	3.12094	0.85	21.6704
Absolute Errs	TRUE			6	26.8961	3.27641	ErrBox	ErrBox
Symbol Type	1			7	26.9265	3.18241	1.85	20.2918
Inverse Plot	FALSE			8	27.2884	6.39451	2.15	20.2918
Color Plot	TRUE			9	27.7404	3.3525	2.15	30.5643
3D plot	FALSE			10	27.7463	5.84961	1.85	30.5643
Linear	FALSE			11	27.7576	4.90101	1.85	20.2918
Data Range	U2:V8,U10:V15,U17:V23,U25:V26			12	27.7716	3.26339	ErrBox	ErrBox
Filled Symbols	TRUE			13	27.8996	3.50416	2.85	19.3072
ConcAge	FALSE			14	28.2579	2.80883	3.15	19.3072
ConcSwap	FALSE			15	28.4322	3.33706	3.15	32.3608
1st Symbol-row	1			16	28.4704	2.50953	2.85	32.3608
				17	28.9361	4.2261	2.85	19.3072
				18	29.129	3.64848	ErrBox	ErrBox
				19	29.349	4.74114	3.85	20.9078
				20	29.5868	6.18357	4.15	20.9078
				21	29.8562	6.24251	4.15	31.0155
				22	29.9284	4.07691	3.85	31.0155
				IsoLine	IsoLine	IsoLine	3.85	20.9078
							ErrBox	ErrBox
							4.85	23.1894
							5.15	23.1894
							5.15	29.4313
							4.85	29.4313
							4.85	23.1894
							ErrBox	ErrBox
							5.85	23.6197
							6.15	23.6197
							6.15	30.1725
							5.85	30.1725
							5.85	23.6197
							ErrBox	ErrBox
							6.85	23.7441
							7.15	23.7441
							7.15	30.1089
							6.85	30.1089
							6.85	23.7441
							ErrBox	ErrBox
							7.85	20.8939
							8.15	20.8939
							8.15	33.6829
							7.85	33.6829
							7.85	20.8939
							ErrBox	ErrBox
							8.85	24.3879
							9.15	24.3879
							9.15	31.0929
							8.85	31.0929
							8.85	24.3879
							ErrBox	ErrBox
							9.85	21.8966
							10.15	21.8966
							10.15	33.5959
							9.85	33.5959
							9.85	21.8966
							ErrBox	ErrBox
							10.85	22.8565
							11.15	22.8565
							11.15	32.6586
							10.85	32.6586
							10.85	22.8565
							ErrBox	ErrBox
							11.85	24.5082
							12.15	24.5082
							12.15	31.0349
							11.85	31.0349
							11.85	24.5082
							ErrBox	ErrBox
							12.85	24.3955
							13.15	24.3955
							13.15	31.4038
							12.85	31.4038
							12.85	24.3955
							ErrBox	ErrBox
							13.85	25.4491
							14.15	25.4491
							14.15	31.0668
							13.85	31.0668
							13.85	25.4491
							ErrBox	ErrBox
							14.85	25.0951
							15.15	25.0951
							15.15	31.7693
							14.85	31.7693
							14.85	25.0951
							ErrBox	ErrBox
							15.85	25.9608
							16.15	25.9608
							16.15	30.9799
							15.85	30.9799
							15.85	25.9608
							ErrBox	ErrBox
							16.85	24.7099
							17.15	24.7099
							17.15	33.1622
							16.85	33.1622
							16.85	24.7099
							ErrBox	ErrBox
							17.85	25.4805
							18.15	25.4805
							18.15	32.7775
							17.85	32.7775
							17.85	25.4805
							ErrBox	ErrBox
							18.85	24.6079
							19.15	24.6079
							19.15	34.0902
							18.85	34.0902
							18.85	24.6079
							ErrBox	ErrBox
							19.85	23.4032
							20.15	23.4032
							20.15	35.7703
							19.85	35.7703
							19.85	23.4032
							ErrBox	ErrBox
							20.85	23.6137
							21.15	23.6137
							21.15	36.0987
							20.85	36.0987
							20.85	23.6137
							ErrBox	ErrBox
							21.85	25.8515
							22.15	25.8515
							22.15	34.0053
							21.85	34.0053
							21.85	25.8515
							ErrBox	ErrBox

## Sheet: My11 titanite
Grain		Pb207/U235	Pb207/U235 ±2σ	Pb206/U238	Pb206/U238 ±2σ	Pb206/U238 vs Pb207/U235	Pb206/U238	Pb206/U238 ±2σ	Pb207/Pb206	Pb207/Pb206 ±2σ	Pb206/U238 vs Pb207/Pb206		207CorrAge	2SigAbs	%					207CorrAge	2SigAbs
My11_1		0.2029	0.013	0.01612	0.0014	0.75209	62.0347	5.38763	0.0934	0.0027	0.21752		97.2316	8.40923	0.0864866					25.0157	3.34526
My11_2		1.447	0.088	0.02472	0.0022	0.63415	40.4531	3.60019	0.42	0.016	0.39368		84.022	8.1331	0.0967973					25.428	5.13625
My11_3		2.24	0.16	0.0237	0.0022	0.84632	42.1941	3.91675	0.684	0.028	-0.29688		29.5868	6.18357	0.208998					25.834	6.5268
My11_4		1.91	0.23	0.0311	0.0032	0.96065	32.1543	3.30849	0.436	0.024	-0.85114		101.738	12.0513	0.118454					25.9616	5.05384
My11_5		1.92	0.18	0.0205	0.0021	0.87252	48.7805	4.99703	0.671	0.03	0.080157		27.7463	5.84961	0.210825					26.3103	3.12094
My11_6		1080	170	9.1	1.6	0.97236	0.10989	0.0193213	0.861	0.029	0.050784		-2153.9	3026.42	-1.40509					26.8961	3.27641
My11_7		6.4	0.38	0.0637	0.0055	0.81594	15.6986	1.35545	0.729	0.018	0.036181		56.9158	11.1182	0.195344					26.9265	3.18241
My11_8		0.785	0.043	0.0197	0.0017	0.59135	50.7614	4.38043	0.2898	0.0091	0.11341		87.6602	7.6772	0.0875791					27.2884	6.39451
My11_9		2.608	0.15	0.02709	0.0023	0.83443	36.914	3.13408	0.702	0.025	-0.098872		29.8562	6.24251	0.209086					27.7404	3.3525
My11_10		0.788	0.044	0.02067	0.0018	0.53003	48.3793	4.213	0.2823	0.01	0.25308		93.2181	8.2571	0.0885783					27.7463	5.84961
My11_11		1.763	0.097	0.01959	0.0017	0.51344	51.0465	4.42976	0.643	0.025	0.31627		30.9961	4.90138	0.158129					27.7576	4.90101
My11_12		154.5	8	1.379	0.12	0.34871	0.725163	0.0631034	0.836	0.033	0.56718		0.775042	383.025	494.2					27.7716	3.26339
My11_13		0.903	0.051	0.01171	0.001	0.30471	85.3971	7.29266	0.555	0.024	0.46414		26.8961	3.27641	0.121817					27.8996	3.50416
My11_14		0.212	0.014	0.01348	0.0011	0.67136	74.184	6.05359	0.1122	0.0038	0.045451		79.3296	6.46024	0.0814355					28.2579	2.80883
My11_15		1.634	0.12	0.01839	0.0017	0.8875	54.3774	5.02673	0.644	0.021	-0.29206		28.9361	4.2261	0.14605					28.4322	3.33706
My11_16		3.06	0.67	0.0286	0.0052	0.99141	34.965	6.35728	0.734	0.032	-0.46646		24.0097	8.78655	0.365959					28.4704	2.50953
My11_17		2.131	0.13	0.02387	0.0021	0.54155	41.8936	3.68565	0.645	0.026	0.11571		37.4279	6.13354	0.163876					28.9361	4.2261
My11_18		6.48	0.44	0.0684	0.006	0.4045	14.6199	1.28245	0.683	0.036	0.47637		87.3464	21.5191	0.246365					29.129	3.64848
My11_19		0.476	0.028	0.00902	0.00077	0.49933	110.865	9.46406	0.381	0.015	0.49188		33.4867	3.06838	0.0916298					29.349	4.74114
My11_20		0.299	0.017	0.00901	0.00077	0.49787	110.988	9.48508	0.2384	0.0098	0.17071		43.8801	3.81193	0.0868714					29.5868	6.18357
My11_21		0.98	0.063	0.0128	0.0012	0.49638	78.125	7.32422	0.55	0.028	0.56538		29.9284	4.07691	0.136222					29.8562	6.24251
My11_22		0.459	0.077	0.01065	0.0012	0.9571	93.8967	10.5799	0.303	0.031	-0.85435		46.2816	5.85299	0.126465					29.9284	4.07691
My11_23		0.213	0.015	0.00601	0.00051	0.60512	166.389	14.1196	0.255	0.014	-0.17879		28.4704	2.50953	0.0881454					30.0515	4.35433
My11_24		0.839	0.044	0.01145	0.00097	0.71716	87.3362	7.39879	0.534	0.015	0.36288		28.2579	2.80883	0.0993999					30.2955	3.02552
My11_25		0.774	0.044	0.0107	0.00094	0.14711	93.4579	8.21032	0.528	0.024	0.63791		26.9265	3.18241	0.118189					30.6506	6.62338
My11_26		2.033	0.11	0.02196	0.0019	0.51229	45.5373	3.93993	0.682	0.023	0.34991		27.7576	4.90101	0.176565					30.9961	4.90138
My11_27		1.94	0.2	0.0208	0.0022	0.95668	48.0769	5.08506	0.687	0.025	-0.48401		25.428	5.13625	0.201992					32.2978	7.19408
My11_28		2.75	0.31	0.0264	0.0031	0.96898	37.8788	4.44789	0.717	0.026	-0.65089		25.834	6.5268	0.252644					32.9296	6.47574
My11_29		1131	98	9.54	1.1	0.87141	0.104822	0.0120864	0.882	0.04	0.22494		-4979.61	6588.32	-1.32306					33.4867	3.06838
My11_30		1.91	0.31	0.0202	0.0029	0.97768	49.505	7.10715	0.641	0.033	-0.68038		32.2978	7.19408	0.222742					33.8028	4.09621
My11_31		0.865	0.048	0.01294	0.0011	0.80555	77.2798	6.56938	0.49	0.017	-0.070786		36.5815	3.61349	0.0987793					34.1382	7.44783
My11_32		0.909	0.096	0.01463	0.0014	0.92387	68.3527	6.54093	0.436	0.026	-0.61591		47.7915	5.52468	0.1156					36.5815	3.61349
My11_33		3.75	0.24	0.0372	0.0032	0.76593	26.8817	2.31241	0.748	0.026	-0.056842		27.0389	8.49472	0.314167					37.4279	6.13354
My11_34		1.609	0.098	0.0281	0.0024	0.37211	35.5872	3.03947	0.415	0.018	0.28952		96.6673	9.20333	0.0952062					37.5156	4.70477
My11_35		4.94	0.3	0.055	0.0048	0.84853	18.1818	1.58678	0.651	0.018	-0.1765		84.3842	11.1829	0.132523					39.7867	6.21439
My11_36		1.338	0.075	0.0161	0.0014	0.35761	62.1118	5.40103	0.608	0.026	0.45718		30.0515	4.35433	0.144896					41.7916	3.52592
My11_37		0.874	0.06	0.01192	0.0011	0.60266	83.8926	7.74177	0.537	0.025	0.20317		29.129	3.64848	0.125252					41.8289	4.42395
My11_38		0.522	0.031	0.01098	0.00094	0.47896	91.0747	7.79692	0.348	0.013	0.34434		43.7069	3.91827	0.0896486					43.5391	5.81011
My11_39		1312	110	10.96	1.2	0.87235	0.0912409	0.00998988	0.868	0.033	0.16134		-3659.32	5130.87	-1.40214					43.7069	3.91827
My11_40		0.667	0.039	0.01971	0.0017	0.44643	50.7357	4.37598	0.2455	0.008	0.30824		94.7332	8.235	0.0869283					43.8801	3.81193
My11_41		0.545	0.056	0.0111	0.00096	0.94231	90.0901	7.79157	0.35	0.018	-0.72134		44.0044	4.13735	0.0940213					43.9412	4.36492
My11_42		4.5	1.2	0.046	0.012	0.9971	21.7391	5.67108	0.758	0.027	-0.63193		29.7475	13.0243	0.437828					44.0044	4.13735
My11_43		0.889	0.054	0.02259	0.0019	0.75735	44.2674	3.72324	0.2875	0.0086	0.065049		100.917	8.59803	0.085199					44.5342	3.86093
My11_44		1499	95	12.95	1.2	0.86047	0.0772201	0.00715553	0.865	0.023	0.21738		-4018.15	4616.08	-1.14881					44.9455	3.97969
My11_45		0.979	0.062	0.01252	0.0011	0.73213	79.8722	7.01753	0.565	0.022	0.17998		27.7404	3.3525	0.120853					46.1091	6.01618
My11_46		1.55	0.2	0.0192	0.0021	0.96478	52.0833	5.69662	0.583	0.028	-0.62165		39.7867	6.21439	0.156193					46.2816	5.85299
My11_47		2.31	0.2	0.0246	0.0025	0.91795	40.6504	4.13114	0.701	0.028	-0.27833		27.2884	6.39451	0.234331					47.5317	4.40675
My11_48		2.127	0.12	0.02497	0.0021	0.68103	40.0481	3.36808	0.611	0.022	-0.19545		46.1091	6.01618	0.130477					47.7915	5.52468
My11_49		1.435	0.085	0.02619	0.0022	0.5989	38.1825	3.20739	0.392	0.014	0.071873		94.9495	8.49855	0.089506					48.615	8.01395
My11_50		0.2234	0.014	0.0081	0.00068	0.7208	123.457	10.3643	0.2028	0.0062	0.073973		41.7916	3.52592	0.0843691					51.5617	4.32362
My11_51		0.574	0.032	0.01252	0.001	0.33153	79.8722	6.37957	0.331	0.013	0.38121		51.5617	4.32362	0.0838533					56.9158	11.1182
My11_52		2.52	0.21	0.0267	0.0029	0.90905	37.4532	4.06795	0.686	0.024	-0.029045		32.9296	6.47574	0.196654					61.601	5.21635
My11_53		0.583	0.035	0.01996	0.0017	0.075571	50.1002	4.26705	0.219	0.013	0.69742		100.183	8.74396	0.0872804					65.696	6.45737
My11_54		0.943	0.056	0.01222	0.001	0.18421	81.8331	6.69665	0.558	0.023	0.45668		27.7716	3.26339	0.117508					79.3296	6.46024
My11_55		1.06	0.12	0.01544	0.0016	0.88823	64.7668	6.71159	0.491	0.029	-0.65311		43.5391	5.81011	0.133446					84.022	8.1331
My11_56		0.942	0.09	0.01426	0.0013	0.92965	70.1262	6.39299	0.477	0.019	-0.56824		41.8289	4.42395	0.105763					84.3842	11.1829
My11_57		0.613	0.036	0.01939	0.0016	0.57229	51.573	4.25563	0.2275	0.0079	-0.021556		96.0052	7.98314	0.0831532					85.0196	7.39032
My11_58		3.98	0.2	0.0397	0.0034	0.82351	25.1889	2.15724	0.732	0.02	0.072531		34.1382	7.44783	0.218167					85.3133	7.86573
My11_59		1500	4500	12	39	0.96248	0.0833333	0.270833	0.819	0.055	0.0057564		#VALUE!	#VALUE!	#VALUE!					87.3464	21.5191
My11_60		0.659	0.044	0.01232	0.0011	0.79593	81.1688	7.24722	0.399	0.019	0.00059445		43.9412	4.36492	0.0993353					87.6602	7.6772
My11_61		0.666	0.041	0.01022	0.00088	0.45252	97.8474	8.42521	0.473	0.018	0.092845		30.2955	3.02552	0.0998667					90.369	8.95798
My11_62		1.855	0.1	0.02016	0.0017	0.35469	49.6032	4.18281	0.679	0.027	0.59383		25.9616	5.05384	0.194666					90.9243	15.0252
My11_63		0.517	0.028	0.01111	0.00094	0.49969	90.009	7.61552	0.34	0.013	0.50673		44.9455	3.97969	0.0885446					92.3039	7.86401
My11_64		1	0.06	0.01252	0.001	0.23822	79.8722	6.37957	0.579	0.022	0.23505		26.3103	3.12094	0.11862					92.9091	7.94605
My11_65		1.139	0.061	0.01415	0.0013	0.57732	70.6714	6.49278	0.595	0.02	0.42243		27.8996	3.50416	0.125599					93.093	8.18865
My11_66		1.2	0.12	0.025	0.0023	0.88956	40	3.68	0.344	0.018	-0.55586		100.307	9.88296	0.0985275					93.2181	8.2571
My11_67		2.43	0.31	0.0274	0.0033	0.98201	36.4964	4.39555	0.62	0.024	-0.69508		48.615	8.01395	0.164845					94.1104	8.33866
My11_68		1.648	0.11	0.02743	0.0024	0.63126	36.4564	3.18977	0.433	0.019	-0.04638		90.369	8.95798	0.0991267					94.4376	9.75955
My11_69		0.998	0.06	0.02294	0.0019	0.35067	43.592	3.61049	0.318	0.015	0.1707		96.8489	8.46097	0.0873626					94.7332	8.235
My11_70		1.053	0.059	0.01392	0.0012	0.32254	71.8391	6.19302	0.539	0.025	0.6434		33.8028	4.09621	0.12118					94.9495	8.49855
My11_71		3.54	0.3	0.0344	0.0033	0.94424	29.0698	2.78867	0.728	0.02	-0.46699		30.6506	6.62338	0.216093					95.9498	8.60165
My11_72		2.59	0.16	0.0363	0.0032	0.92209	27.5482	2.42849	0.519	0.017	-0.5451		94.4376	9.75955	0.103344					96.0052	7.98314
My11_73		1.135	0.057	0.01353	0.0012	0.23068	73.9098	6.5552	0.61	0.022	0.49786		25.0157	3.34526	0.133726					96.3882	8.54216
My11_74		0.541	0.03	0.01832	0.0016	0.35359	54.5852	4.76726	0.2114	0.0084	0.43196		93.093	8.18865	0.0879621					96.6673	9.20333
My11_75		0.484	0.027	0.01331	0.0011	0.23842	75.1315	6.20921	0.268	0.011	0.49154		61.601	5.21635	0.0846797					96.8489	8.46097
My11_76		3.79	0.49	0.0365	0.0049	0.96976	27.3973	3.67799	0.743	0.024	-0.20072		28.0299	8.3375	0.29745					97.2316	8.40923
My11_77		0.919	0.058	0.01229	0.0011	0.53171	81.367	7.28264	0.553	0.021	0.34386		28.4322	3.33706	0.117369					97.4024	8.69518
My11_78		4.15	0.25	0.0487	0.0043	0.25858	20.5339	1.81305	0.61	0.032	0.50685		90.9243	15.0252	0.16525					98.0102	8.0258
My11_79		750	120	6.4	1.1	0.97334	0.15625	0.0268555	0.839	0.067	0.18731		-3570.09	6223.89	-1.74334					100.183	8.74396
My11_80		0.291	0.027	0.01503	0.0013	0.74431	66.5336	5.75474	0.1403	0.0083	-0.41956		85.0196	7.39032	0.0869249					100.307	9.88296
My11_81		1.239	0.074	0.02503	0.0021	0.39405	39.9521	3.35195	0.359	0.015	0.36358		97.4024	8.69518	0.0892707					100.917	8.59803
My11_82		51	12	0.44	0.099	0.92682	2.27273	0.511364	0.843	0.084	0.25143		-34.4852	305.339	-8.8542					101.738	12.0513
My11_83		0.421	0.025	0.01024	0.00087	0.69791	97.6562	8.29697	0.3026	0.0094	0.022891		44.5342	3.86093	0.0866959
My11_84		1.577	0.088	0.01809	0.0015	-0.20707	55.2792	4.58368	0.638	0.027	0.77518		29.349	4.74114	0.161543
My11_85		1.119	0.071	0.02369	0.002	0.46653	42.2119	3.56369	0.337	0.014	0.37975		96.3882	8.54216	0.0886225
My11_86		1.524	0.095	0.01862	0.0016	0.5754	53.7057	4.61488	0.59	0.022	0.16643		37.5156	4.70477	0.125408
My11_87		0.858	0.053	0.01998	0.0018	0.68384	50.0501	4.50901	0.3121	0.011	0.29972		85.3133	7.86573	0.0921982
My11_88		4620	280	38.5	3.5	0.89353	0.025974	0.00236127	0.856	0.022	0.18694		-19019.1	134421	-7.06766
My11_89		0.356	0.021	0.01697	0.0015	0.43039	58.9275	5.20868	0.1538	0.0073	0.54271		94.1104	8.33866	0.0886051
My11_90		0.452	0.024	0.01757	0.0015	0.61078	56.9152	4.85901	0.1858	0.0063	0.29042		92.9091	7.94605	0.085525
My11_91		0.455	0.027	0.01837	0.0015	0.56456	54.4366	4.44501	0.1798	0.0067	0.2566		98.0102	8.0258	0.0818873
My11_92		0.679	0.04	0.01283	0.0011	0.43702	77.9423	6.68251	0.382	0.016	0.44402		47.5317	4.40675	0.0927118
My11_93		0.856	0.05	0.02166	0.0019	0.51842	46.1681	4.04983	0.2922	0.011	0.28245		95.9498	8.60165	0.0896474
My11_94		0.472	0.029	0.01772	0.0015	0.6285	56.4334	4.77709	0.1956	0.0081	0.21866		92.3039	7.86401	0.0851969
My11_95		no value	0	no value	0	NaN	#VALUE!	0	no value	0	NaN		#VALUE!	#VALUE!	#VALUE!
My11_96		0.869	0.079	0.01706	0.0015	0.88794	58.6166	5.15387	0.364	0.021	-0.60178		65.696	6.45737	0.0982917

## Sheet: My12 zircon
Grain		Pb207/U235	Pb207/U235 ±2σ	Pb206/U238	Pb206/U238 ±2σ	Pb206/U238 vs Pb207/U235		Pb206/U238	Pb206/U238 ±2σ	Pb207/Pb206	Pb207/Pb206 ±2σ	Pb206/U238 vs Pb207/Pb206		FinalAge206/238	FinalAge206/238 ±2σ	FinalAge207/206	FinalAge207/206 ±2σ		CONCORDIA CALCULATION												Concordia Age	+/-2s
My12_1		0.0523	0.0034	0.00783	0.00027	0.20734		0.00783	0.00027	0.0504	0.0033	0.24467		50.2	1.7	220	130		Concordia Age	+/-2s	MSWD	probability of concordance		0.1	Concordia Age	+/-2s	MSWD	probability of concordance			34.132	1.16381
My12_2		0.0652	0.0026	0.01024	0.00026	0.32506		0.01024	0.00026	0.0469	0.0018	0.33478		65.7	1.7	59	74		50.5138	1.64282	0.771262	0.379827		0.1 = 10% threshold of discordancy	50.5138	1.64282	0.771262	0.379827			46.9166	1.52429
My12_3		0.0501	0.0025	0.0071	0.00024	0.40247		0.0071	0.00024	0.0522	0.0026	0.34967		45.6	1.5	280	100		65.3234	1.55966	1.52567	0.216764			65.3234	1.55966	1.52567	0.216764			47.0376	3.38096
My12_4		0.0885	0.0067	0.01373	0.00041	0.16163		0.01373	0.00041	0.0475	0.0038	0.19955		87.9	2.6	60	140								46.2711	1.49005	12.4067	0.000427805			47.8522	1.22663
My12_5		0.0736	0.0099	0.01199	0.00051	0.20118		0.01199	0.00051	0.0425	0.0057	0.1276		76.8	3.2	-90	210		87.7214	2.52508	0.320281	0.571439			87.7214	2.52508	0.320281	0.571439			50.5138	1.64282
My12_6		0.0956	0.0072	0.01445	0.0004	0.13194		0.01445	0.0004	0.0465	0.0036	0.23783		92.5	2.5	70	140		76.5859	3.21365	1.04179	0.307407			76.5859	3.21365	1.04179	0.307407			51.2745	1.29326
My12_7		0.233	0.0074	0.03367	0.00078	0.36488		0.03367	0.00078	0.0506	0.0016	0.32473		213.4	4.9	210	65		92.5043	2.46696	0.00425743	0.947976			92.5043	2.46696	0.00425743	0.947976			51.3664	1.87862
My12_8		0.473	0.043	0.01668	0.00055	0.50111		0.01668	0.00055	0.201	0.016	-0.060771		106.6	3.5	2760	140		213.212	4.41315	0.0658956	0.797409			213.212	4.41315	0.0658956	0.797409			52.4324	2.28818
My12_9		0.0658	0.0081	0.00989	0.00046	0.014898		0.00989	0.00046	0.0483	0.0065	0.46205		63.4	2.9	120	220								93.4215	3.15497	308.802	3.9836e-69			54.9676	2.51352
My12_10		0.0961	0.0048	0.01448	0.00036	0.31046		0.01448	0.00036	0.0497	0.0023	0.23517		92.7	2.3	165	89		63.5968	2.75872	0.0945994	0.758409			63.5968	2.75872	0.0945994	0.758409			55.5881	2.6145
My12_11		0.0641	0.003	0.01016	0.00025	0.17853		0.01016	0.00025	0.0455	0.0022	0.30383		65.2	1.6	12	90		92.7298	2.23853	0.0523997	0.818939			92.7298	2.23853	0.0523997	0.818939			56.1916	2.27871
My12_12		0.0649	0.0029	0.01009	0.00025	0.033978		0.01009	0.00025	0.0467	0.0023	0.45814		64.7	1.6	57	93		64.7684	1.48963	1.89962	0.16812			64.7684	1.48963	1.89962	0.16812			56.7228	1.587
My12_13		0.06	0.011	0.00957	0.00059	0.047574		0.00957	0.00059	0.0505	0.0093	0.30897		61.4	3.8	140	310		64.5073	1.40288	0.305946	0.580179			64.5073	1.40288	0.305946	0.580179			60.3182	3.18135
My12_14		0.0914	0.0094	0.01313	0.00046	0.0075456		0.01313	0.00046	0.0517	0.0056	0.37433		84.1	2.9	240	210		61.1718	3.59796	0.164597	0.684959			61.1718	3.59796	0.164597	0.684959			61.1718	3.59796
My12_15		0.825	0.039	0.0985	0.0039	0.39689		0.0985	0.0039	0.0617	0.0032	0.47305		606	23	660	110		84.5547	2.78402	1.04666	0.306277			84.5547	2.78402	1.04666	0.306277			61.7238	2.25046
My12_16		0.2	0.018	0.00908	0.00041	0.045385		0.00908	0.00041	0.174	0.021	0.14439		58.3	2.6	2310	170		608.442	18.63	0.181165	0.670374			608.442	18.63	0.181165	0.670374			63.0473	1.46399
My12_17		0.0904	0.0047	0.01376	0.00037	0.20342		0.01376	0.00037	0.0485	0.0024	0.26265		88.1	2.3	136	95								60.4383	2.60435	242.952	8.93219e-55			63.5968	2.75872
My12_18		0.0743	0.0047	0.01075	0.00035	0.020511		0.01075	0.00035	0.0503	0.0038	0.45082		68.9	2.3	190	140		88.0606	2.2281	0.00960669	0.921921			88.0606	2.2281	0.00960669	0.921921			63.6082	2.83414
My12_19		0.0691	0.0071	0.01014	0.00047	0.041589		0.01014	0.00047	0.0492	0.0052	0.26647		65.1	3	170	190		69.6821	2.01277	2.42234	0.119616			69.6821	2.01277	2.42234	0.119616			63.6186	2.54642
My12_20		0.0482	0.0043	0.00816	0.00022	0.20081		0.00816	0.00022	0.0436	0.004	0.11065		52.4	1.4	-50	150		65.4699	2.78296	0.596	0.440108			65.4699	2.78296	0.596	0.440108			64.5073	1.40288
My12_21		0.0653	0.0077	0.00833	0.00029	0.18727		0.00833	0.00029	0.0559	0.0065	0.206		53.5	1.9	410	220								52.1689	1.39397	4.98379	0.0255858			64.7684	1.48963
My12_22		0.0516	0.0029	0.00799	0.00021	0.20282		0.00799	0.00021	0.0468	0.0025	0.26193		51.3	1.3	50	100								53.6518	1.85106	8.76839	0.00306495			65.3234	1.55966
My12_23		1.904	0.047	0.1811	0.006	0.3864		0.1811	0.006	0.076	0.0025	0.72434		1072	32	1086	66		51.2745	1.29326	0.0228382	0.879879			51.2745	1.29326	0.0228382	0.879879			65.4699	2.78296
My12_24		0.286	0.026	0.01612	0.00053	0.48233		0.01612	0.00053	0.127	0.011	0.1396		103	3.3	1920	140		1081.83	16.3724	0.389233	0.532703			1081.83	16.3724	0.389233	0.532703			66.1229	1.47481
My12_25		0.095	0.0036	0.01484	0.00049	0.27154		0.01484	0.00049	0.0478	0.0016	0.39385		94.9	3.1	94	67								94.1162	3.13783	214.74	1.26971e-48			66.3023	2.31609
My12_26		0.1108	0.0058	0.01584	0.00041	0.19408		0.01584	0.00041	0.0511	0.0027	0.3682		101.3	2.6	230	100		93.6886	2.56564	2.07952	0.149287			93.6886	2.56564	2.07952	0.149287			69.0281	2.6746
My12_27		0.0967	0.0054	0.01469	0.00035	0.077407		0.01469	0.00035	0.0474	0.0027	0.35421		94	2.2	90	110								102.052	2.49361	3.91076	0.047978			69.6821	2.01277
My12_28		0.1413	0.0087	0.01513	0.0005	0.3674		0.01513	0.0005	0.0685	0.0042	0.15602		96.8	3.2	800	120		93.9679	2.08825	0.0113755	0.915062			93.9679	2.08825	0.0113755	0.915062			70.6292	3.14539
My12_29		0.2845	0.0079	0.03991	0.00083	0.43755		0.03991	0.00083	0.0511	0.0015	0.28758		252.2	5.1	246	63								97.3021	3.17513	103.91	2.11755e-24			73.1594	2.8997
My12_30		0.0561	0.0037	0.00855	0.0004	0.56374		0.00855	0.0004	0.0481	0.0028	0.2535		54.9	2.6	100	110		252.92	4.73381	0.403089	0.525498			252.92	4.73381	0.403089	0.525498			76.5859	3.21365
My12_31		0.0483	0.0039	0.00745	0.0002	0.038869		0.00745	0.0002	0.0475	0.004	0.27073		47.9	1.3	80	160		54.9676	2.51352	0.130323	0.718097			54.9676	2.51352	0.130323	0.718097			82.5084	2.12367
My12_32		0.0581	0.0034	0.00869	0.00038	0.40621		0.00869	0.00038	0.0494	0.0029	0.35137		55.8	2.5	160	120		47.8522	1.22663	0.000584387	0.980714			47.8522	1.22663	0.000584387	0.980714			84.5547	2.78402
My12_33		0.1214	0.0045	0.01393	0.00028	0.14944		0.01393	0.00028	0.0637	0.0026	0.41225		89.1	1.7	733	89		56.1916	2.27871	0.969296	0.324856			56.1916	2.27871	0.969296	0.324856			85.9033	1.88416
My12_34		0.0406	0.0022	0.00594	0.00022	0.0018058		0.00594	0.00022	0.0492	0.0027	0.10007		38.2	1.4	150	110								92.2672	1.71567	163.957	1.54618e-37			87.7214	2.52508
My12_35		0.816	0.061	0.0983	0.0041	0.097587		0.0983	0.0041	0.0628	0.0059	0.64109		604	24	680	190								38.8491	1.18032	3.01893	0.0822976			87.7764	3.48982
My12_36		0.118	0.007	0.01384	0.00038	0.20964		0.01384	0.00038	0.0623	0.0037	0.29742		88.6	2.4	610	120		604.872	20.5475	0.00477917	0.944885			604.872	20.5475	0.00477917	0.944885			88.0127	4.5021
My12_37		0.1056	0.0055	0.01488	0.00036	0.051204		0.01488	0.00036	0.0517	0.0029	0.42647		95.2	2.3	250	110								90.1362	2.38496	59.7298	1.08816e-14			88.0606	2.2281
My12_38		0.0394	0.0018	0.00578	0.00017	0.20328		0.00578	0.00017	0.0494	0.0019	0.045493		37.2	1.1	167	78								96.2627	2.12509	6.07003	0.0137495			89.6555	2.52414
My12_39		0.091	0.0061	0.01285	0.00034	0.43026		0.01285	0.00034	0.0509	0.0031	-0.12965		82.3	2.1	190	110								37.6273	1.00355	4.95626	0.0259964			92.5043	2.46696
My12_40		3.36	0.11	0.2608	0.0088	0.63595		0.2608	0.0088	0.0963	0.0022	0.49945		1493	45	1563	48								82.1642	2.16239	5.65805	0.0173755			92.7298	2.23853
My12_41		0.0684	0.0075	0.00953	0.00037	0.0090712		0.00953	0.00037	0.0534	0.0059	0.075607		61.1	2.4	190	180		1495.19	25.6123	0.00463581	0.945717			1495.19	25.6123	0.00463581	0.945717			92.8946	3.3554
My12_42		0.107	0.014	0.00972	0.00038	0.37442		0.00972	0.00038	0.082	0.0096	0.012627		62.4	2.4	940	230		61.7238	2.25046	2.58593	0.107817			61.7238	2.25046	2.58593	0.107817			93.162	5.13249
My12_43		0.0646	0.004	0.01038	0.00025	0.004561		0.01038	0.00025	0.0449	0.003	0.31378		66.5	1.6	-10	120								60.7282	2.37662	43.3682	4.53492e-11			93.2599	4.24107
My12_44		1.716	0.039	0.1709	0.0038	0.59903		0.1709	0.0038	0.0721	0.0014	0.51886		1018	21	986	42		66.1229	1.47481	2.1247	0.144941			66.1229	1.47481	2.1247	0.144941			93.6886	2.56564
My12_45		0.1161	0.007	0.01518	0.00033	0.19244		0.01518	0.00033	0.0563	0.0034	0.17581		97.1	2.1	410	120		1014.81	14.5223	0.0894486	0.764879			1014.81	14.5223	0.0894486	0.764879			93.9679	2.08825
My12_46		0.982	0.071	0.1136	0.005	0.37493		0.1136	0.005	0.0657	0.005	0.32871		693	29	780	160								97.7594	2.07897	20.5781	5.72481e-06			94.5111	3.14393
My12_47		0.103	0.0044	0.01471	0.00032	0.20458		0.01471	0.00032	0.0511	0.0023	0.30001		94.2	2	254	90		693.947	26.3672	0.00296365	0.956585			693.947	26.3672	0.00296365	0.956585			95.498	3.05927
My12_48		0.052	0.0037	0.00689	0.00022	0.30669		0.00689	0.00022	0.0562	0.004	0.13794		44.3	1.4	370	140								94.9019	1.94829	6.77056	0.00926736			96.6584	3.81394
My12_49		0.124	0.013	0.00865	0.00026	0.50879		0.00865	0.00026	0.1034	0.0096	-0.15017		55.5	1.7	1440	180								44.5286	1.40362	17.7168	2.56354e-05			97.3024	3.46857
My12_50		0.1027	0.0078	0.01498	0.00067	0.098122		0.01498	0.00067	0.0509	0.0043	0.31488		95.8	4.3	260	180								51.8283	1.52464	123.264	1.22077e-28			99.3448	3.3553
My12_51		1.839	0.059	0.1771	0.0036	0.36678		0.1771	0.0036	0.0761	0.0025	0.32933		1053	19	1107	66		96.6584	3.81394	0.730398	0.392754			96.6584	3.81394	0.730398	0.392754			123.059	8.92087
My12_52		0.186	0.012	0.01086	0.00029	0.24099		0.01086	0.00029	0.1293	0.0082	0.24795		69.6	1.8	2030	120		1054.83	16.8836	0.52808	0.467415			1054.83	16.8836	0.52808	0.467415			126.738	7.47689
My12_53		0.0693	0.007	0.00994	0.0004	0.45231		0.00994	0.0004	0.0517	0.0055	0.35602		63.8	2.6	200	180								68.1658	1.84524	387.554	2.82164e-86			179.141	4.68705
My12_54		0.0395	0.0028	0.0053	0.00014	0.28763		0.0053	0.00014	0.0561	0.0044	0.22745		34.06	0.88	350	140		63.6186	2.54642	2.05704	0.151504			63.6186	2.54642	2.05704	0.151504			213.212	4.41315
My12_55		0.233	0.034	0.01482	0.00067	0.38506		0.01482	0.00067	0.113	0.014	-0.10568		94.8	4.3	1410	250								34.1498	0.897713	16.0112	6.29704e-05			235.681	4.42238
My12_56		0.0599	0.0028	0.00874	0.00024	0.30618		0.00874	0.00024	0.0504	0.0023	0.3674		56.1	1.5	204	94								90.2062	4.11188	69.0815	9.44779e-17			252.92	4.73381
My12_57		0.0327	0.00067	0.004745	8.2e-05	0.49199		0.004745	8.2e-05	0.04976	0.00098	0.45885		30.52	0.52	178	43								56.5572	1.47873	5.01175	0.0251758			281.156	5.49082
My12_58		0.197	0.012	0.02806	0.00081	0.079701		0.02806	0.00081	0.0514	0.0036	0.35373		178.3	5.1	240	120								31.1353	0.497127	49.8367	1.67091e-12			487.928	11.8252
My12_59		0.049	0.0041	0.00727	0.00025	0.083202		0.00727	0.00025	0.049	0.0037	-0.037412		46.7	1.6	100	110		179.141	4.68705	0.577354	0.447351			179.141	4.68705	0.577354	0.447351			498.722	21.2225
My12_60		5.7	0.1	0.3357	0.0049	0.57727		0.3357	0.0049	0.1227	0.002	0.34308		1865	23	2004	29		46.9166	1.52429	0.815601	0.366469			46.9166	1.52429	0.815601	0.366469			561.368	9.4459
My12_61		0.191	0.016	0.01508	0.00049	0.32202		0.01508	0.00049	0.0952	0.0083	0.1245		96.4	3.1	1370	160								1925.82	15.3687	44.6795	2.3208e-11			571.166	13.7319
My12_62		0.0357	0.002	0.00511	0.00016	0.32291		0.00511	0.00016	0.0493	0.0026	0.13276		32.9	1	170	100								94.3068	3.09314	143.349	4.93179e-33			573.702	13.8274
My12_63		0.0961	0.0037	0.01366	0.00036	0.28792		0.01366	0.00036	0.0509	0.0019	0.41983		87.4	2.3	224	77								33.1652	1.00465	8.4414	0.00366774			604.872	20.5475
My12_64		12.67	0.39	0.509	0.02	0.83996		0.509	0.02	0.1801	0.0044	0.59601		2646	86	2653	40								88.8172	2.13126	10.3971	0.00126211			608.442	18.63
My12_65		0.0693	0.0039	0.00973	0.00038	0.30719		0.00973	0.00038	0.0521	0.0025	0.0087742		62.4	2.4	266	99		2656.38	21.8014	0.00945218	0.92255			2656.38	21.8014	0.00945218	0.92255			693.947	26.3672
My12_66		0.0754	0.007	0.01069	0.00043	0.18896		0.01069	0.00043	0.051	0.0048	0.23285		68.5	2.7	330	170								63.6562	2.28107	8.91777	0.00282409			789.382	21.7818
My12_67		1.177	0.049	0.1301	0.0044	0.67353		0.1301	0.0044	0.066	0.0021	0.24034		788	25	812	61		69.0281	2.6746	2.48793	0.114722			69.0281	2.6746	2.48793	0.114722			844.242	14.4119
My12_68		0.0413	0.0042	0.00565	0.00034	0.47952		0.00565	0.00034	0.0562	0.0052	0.202		36.3	2.2	400	190		789.382	21.7818	0.0229384	0.879617			789.382	21.7818	0.0229384	0.879617			874.147	20.9423
My12_69		4.9	0.11	0.296	0.0065	0.76542		0.296	0.0065	0.1211	0.0017	0.46621		1673	32	1974	26								36.485	2.17618	6.9964	0.00816737			921.327	13.1675
My12_70		0.742	0.018	0.0905	0.0019	0.51405		0.0905	0.0019	0.0585	0.0014	0.34847		558	11	530	53								1831.24	17.9709	146.886	8.30927e-34			1014.81	14.5223
My12_71		0.0538	0.0031	0.00657	0.00016	0.019439		0.00657	0.00016	0.0605	0.0038	0.32798		42.2	1.1	520	120		561.368	9.4459	0.888585	0.345861			561.368	9.4459	0.888585	0.345861			1054.83	16.8836
My12_72		0.0925	0.0099	0.01457	0.00055	0.089572		0.01457	0.00055	0.0487	0.0059	0.44201		93.3	3.5	70	210								43.3062	0.976607	48.6166	3.11232e-12			1081.83	16.3724
My12_73		0.0963	0.0069	0.01394	0.00041	0.14926		0.01394	0.00041	0.0501	0.0036	0.26787		89.3	2.6	190	140		92.8946	3.3554	0.513834	0.473484			92.8946	3.3554	0.513834	0.473484			1109	14.4229
My12_74		0.0738	0.0065	0.00712	0.00027	0.26179		0.00712	0.00027	0.0773	0.007	0.16078		45.7	1.7	1010	180		89.6555	2.52414	1.57984	0.208783			89.6555	2.52414	1.57984	0.208783			1495.19	25.6123
My12_75		5.011	0.082	0.3061	0.0052	0.51437		0.3061	0.0052	0.119	0.0021	0.50412		1723	25	1943	31								45.8339	1.72875	78.1154	9.71947e-19			1854.41	15.3466
My12_76		0.0946	0.0064	0.0133	0.0004	0.22404		0.0133	0.0004	0.0526	0.0036	0.2433		85.1	2.5	280	130								1817.47	14.0949	81.5067	1.74668e-19			2439.6	22.2637
My12_77		0.2606	0.0069	0.03731	0.00085	0.3327		0.03731	0.00085	0.0508	0.0015	0.51273		236.1	5.3	231	63								85.7491	2.49296	4.96611	0.0258488			2656.38	21.8014
My12_78		0.921	0.032	0.0966	0.0037	0.69092		0.0966	0.0037	0.0706	0.0019	0.40647		594	22	936	55		235.681	4.42238	0.0988926	0.753163			235.681	4.42238	0.0988926	0.753163
My12_79		17.81	0.39	0.548	0.013	0.74093		0.548	0.013	0.2347	0.0038	0.54582		2815	54	3087	26								652.507	16.9381	74.8024	5.20252e-18
My12_80		0.0582	0.0036	0.00812	0.00025	0.3529		0.00812	0.00025	0.0515	0.0029	0.18623		52.1	1.6	240	110								3016.05	18.6758	63.6231	1.50655e-15
My12_81		0.0817	0.0074	0.00975	0.00032	0.38288		0.00975	0.00032	0.0612	0.0053	0.013533		62.5	2	550	170								52.432	1.58897	10.5763	0.00114544
My12_82		0.0689	0.0037	0.01007	0.00031	0.35879		0.01007	0.00031	0.0516	0.0028	0.33224		64.6	2	240	100								62.0044	2.0338	27.9403	1.25119e-07
My12_83		0.0855	0.0048	0.01286	0.00035	0.18219		0.01286	0.00035	0.0481	0.0026	0.25853		82.4	2.2	120	100								64.9741	1.93432	3.31911	0.0684788
My12_84		0.141	0.013	0.01476	0.00058	0.16036		0.01476	0.00058	0.0695	0.0072	0.32872		94.4	3.7	830	210		82.5084	2.12367	0.160955	0.688278			82.5084	2.12367	0.160955	0.688278
My12_85		0.08	0.01	0.00997	0.0005	0.60251		0.00997	0.0005	0.0609	0.0075	-0.0094677		63.9	3.2	470	210								96.2703	3.64495	45.0009	1.96944e-11
My12_86		0.0498	0.0056	0.0073	0.00053	0.55735		0.0073	0.00053	0.0492	0.0045	-0.014602		46.9	3.4	130	170								62.1431	3.02686	12.6791	0.000369773
My12_87		0.172	0.012	0.00971	0.00038	0.089822		0.00971	0.00038	0.132	0.011	0.5486		62.3	2.4	2040	140		47.0376	3.38096	1.18523	0.276294			47.0376	3.38096	1.18523	0.276294
My12_88		0.0668	0.0037	0.00977	0.00024	0.12488		0.00977	0.00024	0.0484	0.0028	0.35482		62.6	1.6	150	110								64.9678	2.40793	326.131	6.69049e-73
My12_89		0.153	0.015	0.0108	0.00032	0.4357		0.0108	0.00032	0.0993	0.0083	-0.15273		69.2	2.1	1470	170		63.0473	1.46399	2.64652	0.103777			63.0473	1.46399	2.64652	0.103777
My12_90		0.0643	0.0072	0.00992	0.00045	0.25747		0.00992	0.00045	0.0465	0.0049	0.24099		63.6	2.9	30	190								65.5854	1.94328	134.824	3.60798e-31
My12_91		0.119	0.011	0.00892	0.00034	0.30499		0.00892	0.00034	0.0979	0.0085	0.11125		57.2	2.1	1500	180		63.6082	2.83414	0.0112851	0.915399			63.6082	2.83414	0.0112851	0.915399
My12_92		0.0489	0.004	0.00668	0.00021	0.1388		0.00668	0.00021	0.0557	0.0049	0.30896		42.9	1.3	360	170								55.9429	2.16196	134.155	5.05345e-31
My12_93		0.0572	0.0024	0.0078	0.00019	0.2935		0.0078	0.00019	0.0541	0.0023	0.33963		50.1	1.2	380	92								43.3083	1.31703	8.00426	0.00466674
My12_94		0.619	0.019	0.0779	0.0022	0.82806		0.0779	0.0022	0.0567	0.001	0.35154		483	13	473	40								50.8915	1.18224	31.5664	1.92731e-08
My12_95		1.478	0.032	0.1531	0.0034	0.67471		0.1531	0.0034	0.0715	0.0012	0.39041		918	19	972	33		487.928	11.8252	2.26953	0.13194			487.928	11.8252	2.26953	0.13194
My12_96		0.121	0.0074	0.01395	0.00035	0.041571		0.01395	0.00035	0.063	0.004	-0.017104		89.3	2.3	590	120		921.327	13.1675	0.192061	0.661207			921.327	13.1675	0.192061	0.661207
My12_97		0.0985	0.0084	0.01476	0.0005	0.26699		0.01476	0.0005	0.0477	0.0038	0.085415		94.4	3.2	70	140								91.5996	2.14245	57.2145	3.90771e-14
My12_98		1.298	0.037	0.1397	0.0039	0.21315		0.1397	0.0039	0.0675	0.0025	0.64653		843	22	847	80		94.5111	3.14393	0.0613213	0.80442			94.5111	3.14393	0.0613213	0.80442
My12_99		0.099	0.016	0.01454	0.00069	0.03305		0.01454	0.00069	0.052	0.01	0.40009		93	4.4	200	350		844.242	14.4119	0.0232897	0.878706			844.242	14.4119	0.0232897	0.878706
My12_100		2.83	0.23	0.0484	0.0035	0.15525		0.0484	0.0035	0.446	0.041	0.0776		304	21	3920	140		93.2599	4.24107	0.133693	0.714633			93.2599	4.24107	0.133693	0.714633
My12_101		0.184	0.011	0.00908	0.00035	0.4053		0.00908	0.00035	0.1473	0.0081	0.1593		58.3	2.2	2280	100								297.183	21.5373	476.08	1.52339e-105
My12_102		0.0561	0.0038	0.00888	0.00027	0.045335		0.00888	0.00027	0.0455	0.0032	0.41052		57	1.7	10	130								52.6233	2.18981	590.813	1.6675e-130
My12_103		0.0562	0.0033	0.00816	0.00024	0.35764		0.00816	0.00024	0.0501	0.003	0.10777		52.4	1.5	210	120		56.7228	1.587	0.625339	0.42907			56.7228	1.587	0.625339	0.42907
My12_104		0.0812	0.003	0.01191	0.00039	0.67258		0.01191	0.00039	0.0497	0.0014	0.32673		76.3	2.5	175	58								52.6025	1.52198	4.3673	0.0366349
My12_105		12.23	0.19	0.4404	0.0085	0.42039		0.4404	0.0085	0.1998	0.0033	0.62558		2357	38	2823	28								77.2365	2.39291	7.37372	0.00661839
My12_106		0.1048	0.0082	0.01179	0.00043	0.49629		0.01179	0.00043	0.0675	0.0049	-0.03889		75.5	2.8	760	140								2622.07	15.0138	250.019	2.57248e-56
My12_107		0.0758	0.0079	0.01093	0.00052	0.11102		0.01093	0.00052	0.0508	0.0055	0.2961		70.1	3.3	210	220								73.8705	2.70559	58.3128	2.23581e-14
My12_108		0.0888	0.0096	0.00946	0.00042	0.13085		0.00946	0.00042	0.0707	0.0079	0.29476		60.9	2.6	740	220		70.6292	3.14539	1.10303	0.293603			70.6292	3.14539	1.10303	0.293603
My12_109		0.3207	0.0083	0.0444	0.001	0.52827		0.0444	0.001	0.0526	0.0013	0.40757		280.1	6.3	297	53								61.9144	2.64746	31.8234	1.68844e-08
My12_110		0.0477	0.0026	0.00706	0.00029	0.5348		0.00706	0.00029	0.0491	0.0016	-0.098249		45.3	1.9	147	65		281.156	5.49082	0.611	0.434412			281.156	5.49082	0.611	0.434412
My12_111		0.093	0.011	0.01368	0.00056	0.14493		0.01368	0.00056	0.0518	0.0066	0.38256		87.6	3.6	160	220								45.7367	1.80646	3.20594	0.0733713
My12_112		0.0693	0.0041	0.00779	0.0002	0.31906		0.00779	0.0002	0.0641	0.0034	0.11957		50.1	1.3	690	120		87.7764	3.48982	0.273968	0.600682			87.7764	3.48982	0.273968	0.600682
My12_113		0.0578	0.0085	0.00942	0.0005	0.30839		0.00942	0.0005	0.0432	0.0059	0.12971		60.4	3.2	-30	230								50.0517	1.28042	93.5946	3.87247e-22
My12_114		0.0744	0.0082	0.0053	0.00022	0.13656		0.0053	0.00022	0.104	0.012	0.078207		34.1	1.4	1340	210		60.3182	3.18135	0.757436	0.384132			60.3182	3.18135	0.757436	0.384132
My12_115		0.637	0.035	0.0797	0.0041	0.73693		0.0797	0.0041	0.0591	0.0024	0.30471		494	25	549	89								34.3495	1.41007	98.1538	3.87123e-23
My12_116		0.26	0.01	0.03353	0.00067	0.08386		0.03353	0.00067	0.0556	0.0024	0.41025		212.6	4.2	402	89		498.722	21.2225	0.519359	0.471115			498.722	21.2225	0.519359	0.471115
My12_117		0.095	0.011	0.01361	0.00077	0.050581		0.01361	0.00077	0.0508	0.006	0.39751		87.1	4.9	250	240								216.713	3.84613	24.9663	5.83416e-07
My12_118		0.218	0.018	0.0148	0.00052	0.038033		0.0148	0.00052	0.1057	0.0083	0.014424		94.7	3.3	1610	160		88.0127	4.5021	0.812411	0.367408			88.0127	4.5021	0.812411	0.367408
My12_119		0.1198	0.008	0.01239	0.00037	0.23224		0.01239	0.00037	0.0698	0.0049	0.25832		79.4	2.4	870	140								98.178	3.26106	174.223	8.85056e-40
My12_120		0.0963	0.0084	0.00713	0.00024	0.60388		0.00713	0.00024	0.0953	0.0072	-0.048966		45.8	1.5	1430	150								80.3567	2.34887	97.1295	6.49374e-23
My12_121		5.208	0.096	0.3324	0.0084	0.61418		0.3324	0.0084	0.1124	0.0023	0.64343		1848	40	1831	38								41.0776	1.36359	176.464	2.86774e-40
My12_122		0.059	0.009	0.00863	0.00042	0.077422		0.00863	0.00042	0.0495	0.0079	0.28879		55.4	2.7	110	260		1854.41	15.3466	0.0547474	0.814999			1854.41	15.3466	0.0547474	0.814999
My12_123		0.101	0.016	0.01447	0.00085	0.036512		0.01447	0.00085	0.05	0.0082	0.36717		92.6	5.4	160	300		55.5881	2.6145	0.404347	0.524853			55.5881	2.6145	0.404347	0.524853
My12_124		10.05	0.24	0.4585	0.0099	0.56206		0.4585	0.0099	0.1581	0.0032	0.3949		2431	44	2434	34		93.162	5.13249	0.427738	0.513101			93.162	5.13249	0.427738	0.513101
My12_125		0.141	0.031	0.0198	0.0012	0.10226		0.0198	0.0012	0.052	0.011	0.13054		126.6	7.7	280	360		2439.6	22.2637	0.125084	0.723584			2439.6	22.2637	0.125084	0.723584
My12_126		0.0309	0.0018	0.00449	0.00018	0.49264		0.00449	0.00018	0.0513	0.0024	0.14897		28.9	1.2	222	93		126.738	7.47689	0.291322	0.589375			126.738	7.47689	0.291322	0.589375
My12_127		0.1057	0.0086	0.0151	0.00057	0.16066		0.0151	0.00057	0.0505	0.0041	0.28171		96.6	3.6	230	160								29.1455	1.13693	6.62354	0.010064
My12_128		0.76	0.03	0.0924	0.0025	0.51132		0.0924	0.0025	0.0599	0.0022	0.23622		570	15	595	81		97.3024	3.46857	1.75893	0.184759			97.3024	3.46857	1.75893	0.184759
My12_129		0.1072	0.0071	0.01534	0.00059	0.07764		0.01534	0.00059	0.0497	0.0038	0.48788		98.1	3.7	200	130		571.166	13.7319	0.286488	0.59248			571.166	13.7319	0.286488	0.59248
My12_130		1.97	0.047	0.1892	0.0039	0.28774		0.1892	0.0039	0.0753	0.0019	0.39914		1116	21	1062	47		99.3448	3.3553	2.09775	0.147516			99.3448	3.3553	2.09775	0.147516
My12_131		0.027	0.0013	0.00356	0.00011	0.43004		0.00356	0.00011	0.0538	0.0024	0.26713		22.93	0.69	359	96		1109	14.4229	1.07292	0.300288			1109	14.4229	1.07292	0.300288
My12_132		0.0806	0.0082	0.01136	0.00046	0.23091		0.01136	0.00046	0.0509	0.0054	0.30925		72.8	2.9	220	200								23.2328	0.701013	49.8851	1.63018e-12
My12_133		0.1003	0.0099	0.0149	0.0005	0.067273		0.0149	0.0005	0.0463	0.0046	0.36437		95.3	3.2	30	160		73.1594	2.8997	2.39935	0.121386			73.1594	2.8997	2.39935	0.121386
My12_134		0.0371	0.0023	0.00537	0.00015	0.17633		0.00537	0.00015	0.0501	0.0031	0.24412		34.52	0.94	200	120		95.498	3.05927	0.130281	0.718141			95.498	3.05927	0.130281	0.718141
My12_135		0.0941	0.0039	0.01077	0.00028	0.26938		0.01077	0.00028	0.0634	0.0028	0.39996		69	1.8	679	95								34.7798	0.93281	4.62982	0.0314208
My12_136		0.749	0.033	0.0862	0.002	0.1975		0.0862	0.002	0.0636	0.003	0.22631		534	12	675	93								71.4569	1.74386	151.919	6.59925e-35
My12_137		0.0718	0.0067	0.01026	0.00038	0.070238		0.01026	0.00038	0.0499	0.0049	0.32422		66.1	2.4	180	180								540.631	10.9676	11.2144	0.000811671
My12_138		0.0992	0.0078	0.0139	0.00048	0.095364		0.0139	0.00048	0.0501	0.0042	0.33467		89.3	3	180	150		66.3023	2.31609	1.91834	0.16604			66.3023	2.31609	1.91834	0.16604
My12_139		0.0872	0.0035	0.01345	0.00031	0.30711		0.01345	0.00031	0.0482	0.0019	0.20404		86.1	2	121	76								89.8721	2.90152	3.46542	0.0626645
My12_140		0.0478	0.0043	0.00804	0.00052	0.35546		0.00804	0.00052	0.0449	0.0045	0.34827		51.6	3.3	10	180		85.9033	1.88416	0.573743	0.448775			85.9033	1.88416	0.573743	0.448775
My12_141		0.0549	0.0019	0.00713	0.00019	0.54196		0.00713	0.00019	0.0557	0.0017	0.29624		45.8	1.2	439	67								50.2238	3.00348	3.82456	0.0505066
My12_142		0.0521	0.0068	0.00818	0.00037	0.098306		0.00818	0.00037	0.0478	0.0067	0.35734		52.5	2.3	100	240								46.7275	1.205	117.79	1.92793e-27
My12_143		1.367	0.05	0.1447	0.0051	0.55696		0.1447	0.0051	0.0697	0.0024	0.37693		870	29	939	71		52.4324	2.28818	0.0788108	0.778916			52.4324	2.28818	0.0788108	0.778916
My12_144		0.0559	0.0053	0.00795	0.0003	0.16882		0.00795	0.0003	0.0518	0.0051	0.18183		51	1.9	240	180		874.147	20.9423	0.0907684	0.763203			874.147	20.9423	0.0907684	0.763203
My12_145		0.0357	0.0032	0.00528	0.00019	0.077594		0.00528	0.00019	0.0499	0.0043	0.27776		33.9	1.2	170	160		51.3664	1.87862	2.64665	0.103768			51.3664	1.87862	2.64665	0.103768
My12_146		0.0551	0.0027	0.00793	0.00021	0.055544		0.00793	0.00021	0.0514	0.003	0.5151		50.9	1.3	220	110		34.132	1.16381	1.03715	0.308485			34.132	1.16381	1.03715	0.308485
My12_147		0.153	0.039	0.0196	0.0015	0.56844		0.0196	0.0015	0.057	0.013	0.10755		125	9.5	130	340								51.6147	1.22068	6.12508	0.0133277
My12_148		0.0371	0.0021	0.00523	0.00023	0.51876		0.00523	0.00023	0.0497	0.0025	0.24113		33.7	1.5	180	100		123.059	8.92087	1.64051	0.200255			123.059	8.92087	1.64051	0.200255
My12_149		0.765	0.039	0.0928	0.0028	0.081713		0.0928	0.0028	0.0606	0.004	0.41996		572	17	600	130								34.243	1.43764	13.8376	0.000199307
My12_150		0.02733	0.00088	0.00373	0.00011	0.61553		0.00373	0.00011	0.0533	0.0014	0.30794		24.03	0.73	320	55		573.702	13.8274	0.129157	0.719308			573.702	13.8274	0.129157	0.719308
My12_151		0.0278	0.0015	0.00366	0.00018	0.37145		0.00366	0.00018	0.0548	0.0032	0.55747		23.5	1.2	370	130								24.8125	0.686136	90.9131	1.50124e-21
																									24.8731	1.05915	32.5103	1.18561e-08

## Sheet: PlotDat13
Source sheet	My12 titanite	0.2	26.828	1	22.8162	3.53235	0.85	19.2839
Plot name	Average10	14.8	26.828	2	24.4518	2.47546	1.15	19.2839
Plot Type	15			3	24.4914	3.40307	1.15	26.3486
1st free col	8			4	25.704	4.46873	0.85	26.3486
Sigma Level	2			5	25.7096	3.67716	0.85	19.2839
Absolute Errs	TRUE			6	26.338	2.67313	ErrBox	ErrBox
Symbol Type	1			7	26.5473	3.23403	1.85	21.9763
Inverse Plot	FALSE			8	27.2154	4.54538	2.15	21.9763
Color Plot	TRUE			9	27.9925	2.50256	2.15	26.9273
3D plot	FALSE			10	28.2243	2.8279	1.85	26.9273
Linear	FALSE			11	28.2718	2.90868	1.85	21.9763
Data Range	U2:V15			12	28.319	3.51149	ErrBox	ErrBox
Filled Symbols	TRUE			13	28.6392	2.51118	2.85	21.0883
ConcAge	FALSE			14	28.8189	3.2599	3.15	21.0883
ConcSwap	FALSE			IsoLine	IsoLine	IsoLine	3.15	27.8944
1st Symbol-row	1						2.85	27.8944
							2.85	21.0883
							ErrBox	ErrBox
							3.85	21.2353
							4.15	21.2353
							4.15	30.1727
							3.85	30.1727
							3.85	21.2353
							ErrBox	ErrBox
							4.85	22.0324
							5.15	22.0324
							5.15	29.3867
							4.85	29.3867
							4.85	22.0324
							ErrBox	ErrBox
							5.85	23.6648
							6.15	23.6648
							6.15	29.0111
							5.85	29.0111
							5.85	23.6648
							ErrBox	ErrBox
							6.85	23.3133
							7.15	23.3133
							7.15	29.7814
							6.85	29.7814
							6.85	23.3133
							ErrBox	ErrBox
							7.85	22.67
							8.15	22.67
							8.15	31.7607
							7.85	31.7607
							7.85	22.67
							ErrBox	ErrBox
							8.85	25.4899
							9.15	25.4899
							9.15	30.495
							8.85	30.495
							8.85	25.4899
							ErrBox	ErrBox
							9.85	25.3964
							10.15	25.3964
							10.15	31.0522
							9.85	31.0522
							9.85	25.3964
							ErrBox	ErrBox
							10.85	25.3631
							11.15	25.3631
							11.15	31.1805
							10.85	31.1805
							10.85	25.3631
							ErrBox	ErrBox
							11.85	24.8075
							12.15	24.8075
							12.15	31.8305
							11.85	31.8305
							11.85	24.8075
							ErrBox	ErrBox
							12.85	26.128
							13.15	26.128
							13.15	31.1503
							12.85	31.1503
							12.85	26.128
							ErrBox	ErrBox
							13.85	25.559
							14.15	25.559
							14.15	32.0788
							13.85	32.0788
							13.85	25.559
							ErrBox	ErrBox

## Sheet: My12 titanite
Grain		Pb207/U235	Pb207/U235 ±2σ	Pb206/U238	Pb206/U238 ±2σ	Pb206/U238 vs Pb207/U235	Pb206/U238	Pb206/U238 ±2σ	Pb207/Pb206	Pb207/Pb206 ±2σ	Pb206/U238 vs Pb207/Pb206		207CorrAge	2SigAbs	%					207CorrAge	2SigAbs
My_12_tit_1		0.5	0.032	0.01802	0.00089	0.46106	55.4939	2.74082	0.1997	0.0072	0.059113		93.2679	4.70658	0.0504631					22.8162	3.53235
My_12_tit_2		2.504	0.16	0.03483	0.0018	0.52687	28.7109	1.48377	0.529	0.018	0.10616		87.7618	6.91201	0.0787587					24.4518	2.47546
My_12_tit_3		1.221	0.071	0.01464	0.00079	0.8455	68.306	3.68591	0.6	0.02	0.47442		28.2718	2.90868	0.102883					24.4914	3.40307
My_12_tit_4		2.61	0.17	0.0276	0.0017	0.77747	36.2319	2.23167	0.696	0.019	0.094858		31.7845	4.93013	0.155111					25.704	4.46873
My_12_tit_5		0.579	0.05	0.01919	0.0011	0.78321	52.1105	2.98705	0.215	0.011	-0.47938		96.9456	5.78874	0.0597113					25.7096	3.67716
My_12_tit_6		3.32	0.78	0.0424	0.0069	0.99023	23.5849	3.83811	0.517	0.037	-0.82302		111.115	21.9877	0.197883					26.338	2.67313
My_12_tit_7		1.148	0.078	0.01661	0.0009	0.72411	60.2047	3.26214	0.506	0.017	0.03036		44.8195	3.39469	0.0757413					26.5473	3.23403
My_12_tit_8		0.515	0.032	0.01977	0.00099	0.32937	50.5817	2.53292	0.1924	0.0063	0.20106		103.453	5.25397	0.0507858					27.2154	4.54538
My_12_tit_9		0.266	0.019	0.01763	0.00088	0.045139	56.7215	2.83125	0.1102	0.006	0.33471		103.921	5.22916	0.0503185					27.9925	2.50256
My_12_tit_10		1.849	0.1	0.02031	0.0011	0.46198	49.2368	2.66669	0.666	0.018	0.46784		28.319	3.51149	0.123998					28.2243	2.8279
My_12_tit_11		1.239	0.091	0.02367	0.0014	0.69522	42.2476	2.4988	0.366	0.016	-0.021055		90.7732	6.18115	0.0680944					28.2718	2.90868
My_12_tit_12		0.389	0.022	0.01735	0.0009	0.3567	57.6369	2.98981	0.161	0.0038	0.45454		95.2067	4.94541	0.0519439					28.319	3.51149
My_12_tit_13		0.68	0.04	0.02078	0.0011	0.5768	48.1232	2.54743	0.2375	0.0067	0.26441		101.199	5.45463	0.0539001					28.6392	2.51118
My_12_tit_14		0.394	0.026	0.01766	0.00093	0.62467	56.6251	2.98196	0.1589	0.0053	0.13341		97.1992	5.15047	0.0529889					28.8189	3.2599
My_12_tit_15		11.7	2.3	0.107	0.02	0.99227	9.34579	1.74688	0.772	0.023	-0.65686		58.3975	23.6104	0.404305					29.0141	2.29389
My_12_tit_16		15.3	1.9	0.138	0.016	0.98166	7.24638	0.84016	0.796	0.017	-0.21149		47.7884	21.666	0.453373					29.0998	2.6861
My_12_tit_17		1.44	0.082	0.01629	0.00088	0.39968	61.3874	3.3162	0.637	0.021	0.48902		26.5473	3.23403	0.121821					29.3439	3.26849
My_12_tit_18		0.553	0.033	0.01931	0.001	0.21833	51.7866	2.68186	0.2054	0.0083	0.50574		99.0391	5.26807	0.0531918					30.2214	2.8948
My_12_tit_19		1.404	0.081	0.01686	0.00089	0.15826	59.312	3.13094	0.601	0.023	0.57493		32.4404	3.67016	0.113136					30.578	2.28088
My_12_tit_20		0.775	0.047	0.02067	0.0011	0.42291	48.3793	2.57461	0.2712	0.0082	0.32387		95.0645	5.22915	0.0550064					31.7845	4.93013
My_12_tit_21		0.941	0.052	0.02321	0.0012	-0.11064	43.0849	2.22757	0.296	0.01	0.67495		102.096	5.59145	0.0547666					31.9195	3.98821
My_12_tit_22		0.939	0.068	0.01713	0.0009	0.75704	58.3771	3.0671	0.403	0.022	-0.18851		60.5547	4.42544	0.0730818					32.3586	2.41164
My_12_tit_23		3.58	0.24	0.046	0.0026	0.97336	21.7391	1.22873	0.565	0.011	-0.7136		102.701	7.33781	0.071448					32.4404	3.67016
My_12_tit_24		1.243	0.072	0.01526	0.00086	0.56586	65.5308	3.69309	0.594	0.018	0.47372		30.2214	2.8948	0.0957863					32.8614	3.14584
My_12_tit_25		1.035	0.058	0.02367	0.0013	0.45826	42.2476	2.32031	0.315	0.01	0.53712		100.499	5.83391	0.0580493					33.3895	2.39862
My_12_tit_26		1.421	0.081	0.01659	0.00094	0.45559	60.2773	3.41535	0.62	0.02	0.57013		29.3439	3.26849	0.111386					35.7178	3.14746
My_12_tit_27		1.803	0.11	0.02017	0.0011	0.54587	49.5786	2.70384	0.643	0.021	0.16863		31.9195	3.98821	0.124946					42.4557	3.31267
My_12_tit_28		0.82	0.11	0.02219	0.0014	0.97373	45.0653	2.84324	0.264	0.02	-0.77537		103.325	7.4054	0.0716711					43.5084	2.30484
My_12_tit_29		0.573	0.033	0.01871	0.00094	0.23955	53.4474	2.68522	0.2225	0.0075	0.38038		93.3994	4.81148	0.0515151					43.5212	2.37894
My_12_tit_30		3.99	0.66	0.0492	0.0057	0.98115	20.3252	2.35475	0.578	0.031	-0.75899		104.719	17.3095	0.165294					43.76	2.29553
My_12_tit_31		0.2373	0.014	0.01515	0.00077	0.24057	66.0066	3.35479	0.1153	0.0052	0.15455		88.7408	4.5346	0.0510994					44.3026	2.2845
My_12_tit_32		0.494	0.03	0.01867	0.00098	0.41292	53.5619	2.8115	0.1909	0.0057	0.41052		97.9412	5.19045	0.0529956					44.8195	3.39469
My_12_tit_33		2.47	0.27	0.0249	0.0024	0.96728	40.1606	3.87091	0.703	0.017	-0.38065		27.2154	4.54538	0.167015					45.1098	2.29341
My_12_tit_34		0.758	0.054	0.02179	0.0011	0.89833	45.8926	2.31675	0.2477	0.0087	-0.71792		104.32	5.46576	0.0523945					45.1524	2.54114
My_12_tit_35		0.966	0.064	0.01249	0.00077	0.73504	80.0641	4.93589	0.551	0.019	0.077676		29.0998	2.6861	0.0923064					49.6719	4.19926
My_12_tit_36		0.887	0.051	0.02048	0.0011	0.26993	48.8281	2.6226	0.312	0.012	0.39333		87.4627	5.09674	0.0582733					60.2867	4.81093
My_12_tit_37		1.295	0.068	0.01501	0.00081	0.40464	66.6223	3.5952	0.637	0.016	0.61238		24.4518	2.47546	0.101238					60.5547	4.42544
My_12_tit_38		0.567	0.037	0.01784	0.0009	0.44128	56.0538	2.82783	0.228	0.0085	0.092332		88.278	4.60538	0.0521691					63.9368	3.35677
My_12_tit_39		0.2487	0.015	0.01689	0.00086	0.50427	59.2066	3.01467	0.1081	0.0032	0.17674		99.8633	5.07768	0.0508463					64.8046	3.84711
My_12_tit_40		1.421	0.088	0.02604	0.0013	0.55659	38.4025	1.91717	0.393	0.014	0.12164		94.195	5.5709	0.0591422					67.6749	3.61135
My_12_tit_41		0.769	0.047	0.02165	0.0011	0.22378	46.1894	2.3468	0.257	0.01	0.43009		102.034	5.45408	0.0534538					69.6611	3.53495
My_12_tit_42		0.56	0.033	0.01926	0.001	0.12374	51.9211	2.6958	0.2169	0.009	0.48941		97.0041	5.20769	0.0536852					85.037	4.03754
My_12_tit_43		0.549	0.038	0.01838	0.00091	0.64846	54.407	2.69371	0.2134	0.0093	-0.34936		93.1015	4.7948	0.0515008					85.083	4.89577
My_12_tit_44		0.217	0.019	0.01138	0.00067	0.74727	87.8735	5.17357	0.1362	0.0063	-0.30829		64.8046	3.84711	0.0593648					85.3956	4.25637
My_12_tit_45		0.2937	0.017	0.01194	0.00062	0.23003	83.7521	4.34894	0.1782	0.0057	0.51106		63.9368	3.35677	0.0525014					87.4627	5.09674
My_12_tit_46		1.136	0.064	0.01391	0.00073	0.3341	71.8907	3.77284	0.59	0.017	0.54889		27.9925	2.50256	0.0894013					87.7618	6.91201
My_12_tit_47		0.526	0.03	0.01887	0.00096	0.40997	52.9942	2.69605	0.2015	0.0053	0.25603		97.3805	4.99997	0.0513446					88.278	4.60538
My_12_tit_48		0.643	0.082	0.01422	0.00093	0.94197	70.3235	4.59922	0.316	0.024	-0.84191		60.2867	4.81093	0.0798009					88.7408	4.5346
My_12_tit_49		0.1627	0.0092	0.014	0.0007	0.64217	71.4286	3.57143	0.0854	0.0019	0.13533		85.3956	4.25637	0.049843					88.7711	5.45313
My_12_tit_50		0.477	0.026	0.01059	0.00055	0.42702	94.4287	4.90423	0.3321	0.0083	0.42146		43.5212	2.37894	0.0546616					90.4196	7.82433
My_12_tit_51		1.341	0.08	0.02506	0.0013	0.33035	39.9042	2.07005	0.385	0.013	0.20294		92.2647	5.48096	0.0594047					90.7732	6.18115
My_12_tit_52		1.382	0.077	0.01566	0.00081	0.17403	63.857	3.30295	0.645	0.024	0.50045		24.4914	3.40307	0.13895					91.3214	6.09629
My_12_tit_53		1.028	0.061	0.02348	0.0012	0.14013	42.5894	2.17663	0.321	0.013	0.51103		98.5595	5.60327	0.0568517					92.2647	5.48096
My_12_tit_54		0.3905	0.021	0.00994	0.0005	0.31741	100.604	5.06054	0.2893	0.006	0.45528		44.3026	2.2845	0.0515658					92.3278	5.80678
My_12_tit_55		1.8	0.24	0.0288	0.0024	0.94899	34.7222	2.89352	0.431	0.028	-0.7767		95.3588	10.2584	0.107577					92.4105	4.88533
My_12_tit_56		1.391	0.082	0.0157	0.00084	0.19639	63.6943	3.40785	0.636	0.026	0.54705		25.7096	3.67716	0.143027					92.6545	6.87113
My_12_tit_57		2.46	0.48	0.0349	0.0044	0.98969	28.6533	3.61245	0.462	0.046	-0.94144		106.882	18.6054	0.174074					93.1015	4.7948
My_12_tit_58		1.338	0.083	0.01672	0.00094	0.54928	59.8086	3.36245	0.575	0.017	0.26828		35.7178	3.14746	0.0881204					93.2679	4.70658
My_12_tit_59		0.312	0.021	0.02399	0.0012	0.4258	41.684	2.08507	0.0925	0.004	0.010032		144.553	7.21802	0.0499334					93.3554	4.88113
My_12_tit_60		1.055	0.062	0.02164	0.0011	0.37687	46.2107	2.34897	0.354	0.013	0.253		85.083	4.89577	0.0575411					93.3994	4.81148
My_12_tit_61		0.892	0.055	0.02294	0.0012	0.3385	43.592	2.28031	0.284	0.01	0.30529		103.123	5.68999	0.0551766					93.7798	5.37915
My_12_tit_62		0.431	0.024	0.01884	0.00093	0.51007	53.0786	2.62012	0.165	0.0045	0.080706		102.746	5.09375	0.0495761					94.195	5.5709
My_12_tit_63		1.188	0.065	0.01418	0.00074	0.20817	70.5219	3.68027	0.609	0.019	0.65486		26.338	2.67313	0.101494					94.8118	5.434
My_12_tit_64		0.362	0.021	0.01339	0.00067	0.39151	74.6826	3.73692	0.1969	0.0059	0.17039		69.6611	3.53495	0.050745					95.0645	5.22915
My_12_tit_65		0.375	0.022	0.01926	0.00097	0.27372	51.9211	2.61492	0.1415	0.0048	0.45515		108.655	5.49359	0.05056					95.2067	4.94541
My_12_tit_66		0.916	0.05	0.01247	0.00062	0.27846	80.1925	3.98712	0.536	0.016	0.41946		30.578	2.28088	0.0745921					95.3409	5.48064
My_12_tit_67		0.2498	0.015	0.00859	0.00045	0.66466	116.414	6.09854	0.2144	0.0051	0.10154		43.5084	2.30484	0.0529745					95.3588	10.2584
My_12_tit_68		0.729	0.041	0.02109	0.0011	0.38429	47.4158	2.47309	0.2473	0.0076	0.44978		101.044	5.40936	0.0535345					95.4394	5.07057
My_12_tit_69		0.982	0.058	0.02291	0.0012	0.19819	43.6491	2.28629	0.308	0.012	0.56549		98.5665	5.61202	0.0569364					96.693	4.84588
My_12_tit_70		0.725	0.042	0.02068	0.001	0.43472	48.3559	2.33829	0.2562	0.0078	0.19744		97.6052	4.8844	0.0500424					96.9456	5.78874
My_12_tit_71		0.2459	0.015	0.01859	0.00093	-0.073372	53.7924	2.69107	0.0976	0.0045	0.49561		111.427	5.58296	0.0501042					97.0041	5.20769
My_12_tit_72		0.57	0.038	0.01979	0.0011	0.49164	50.5306	2.80867	0.2125	0.008	0.24682		100.365	5.69944	0.0567872					97.1992	5.15047
My_12_tit_73		1.829	0.11	0.01959	0.001	0.24665	51.0465	2.60574	0.676	0.026	-0.017242		25.704	4.46873	0.173854					97.3805	4.99997
My_12_tit_74		0.373	0.022	0.01324	0.00069	0.20015	75.5287	3.93616	0.2082	0.0076	0.40962		67.6749	3.61135	0.0533633					97.5295	5.02756
My_12_tit_75		0.518	0.033	0.01993	0.0011	0.558	50.1756	2.76935	0.1927	0.0059	0.21047		104.24	5.80433	0.0556824					97.6052	4.8844
My_12_tit_76		0.775	0.047	0.02187	0.0011	0.41865	45.7247	2.29983	0.2605	0.009	0.32067		102.453	5.3772	0.0524845					97.6504	4.91231
My_12_tit_77		1.429	0.086	0.01583	0.00083	0.34122	63.1712	3.3122	0.66	0.025	0.40645		22.8162	3.53235	0.154817					97.9412	5.19045
My_12_tit_78		0.826	0.049	0.02208	0.0012	0.47523	45.2899	2.46141	0.2755	0.0092	0.47714		100.773	5.70206	0.0565832					98.5427	5.0675
My_12_tit_79		0.636	0.039	0.02012	0.001	0.2275	49.7018	2.47027	0.2341	0.0084	0.36077		98.5427	5.0675	0.0514244					98.5595	5.60327
My_12_tit_80		0.855	0.052	0.01172	0.00064	0.2798	85.3242	4.65934	0.537	0.02	0.4956		28.6392	2.51118	0.0876834					98.5665	5.61202
My_12_tit_81		0.477	0.029	0.01845	0.00092	0.44292	54.2005	2.70268	0.1851	0.0053	0.018632		97.6504	4.91231	0.0503051					99.0391	5.26807
My_12_tit_82		0.94	0.12	0.0229	0.0017	0.95905	43.6681	3.24174	0.293	0.02	-0.8712		101.287	8.34477	0.0823875					99.1105	5.72826
My_12_tit_83		0.351	0.022	0.00952	0.00048	0.55571	105.042	5.29624	0.2721	0.0081	0.13338		43.76	2.29553	0.0524572					99.8633	5.07768
My_12_tit_84		0.965	0.061	0.02346	0.0012	0.44128	42.6257	2.18034	0.3	0.011	0.3086		102.439	5.62937	0.0549532					100.266	5.75508
My_12_tit_85		1.34	0.15	0.027	0.0018	0.93103	37.037	2.46914	0.361	0.022	-0.77772		104.634	8.44196	0.0806804					100.365	5.69944
My_12_tit_86		0.706	0.044	0.01108	0.0006	0.39064	90.2527	4.88733	0.467	0.017	0.39621		33.3895	2.39862	0.0718377					100.499	5.83391
My_12_tit_87		0.43	0.024	0.0192	0.001	0.4971	52.0833	2.71267	0.1643	0.0043	0.29044		104.809	5.47252	0.0522141					100.773	5.70206
My_12_tit_88		0.94	0.054	0.01241	0.00066	0.47183	80.5802	4.28549	0.55	0.016	0.46027		29.0141	2.29389	0.0790611					101.044	5.40936
My_12_tit_89		1.506	0.081	0.01708	0.00088	0.097072	58.548	3.01653	0.63	0.02	0.56993		28.8189	3.2599	0.113117					101.199	5.45463
My_12_tit_90		0.32	0.02	0.0094	0.00051	0.26182	106.383	5.77184	0.2466	0.0089	0.38428		45.1524	2.54114	0.0562792					101.287	8.34477
My_12_tit_91		0.2615	0.015	0.01478	0.0007	0.11833	67.659	3.20442	0.1283	0.0039	0.23688		85.037	4.03754	0.0474799					101.321	5.48776
My_12_tit_92		0.51	0.04	0.02085	0.0011	0.41256	47.9616	2.53035	0.176	0.011	0.00038008		111.824	6.14961	0.0549936					101.913	5.76321
My_12_tit_93		0.359	0.023	0.01825	0.00093	0.54413	54.7945	2.79227	0.1432	0.005	0.12841		102.732	5.26032	0.0512042					102.034	5.45408
My_12_tit_94		1.452	0.12	0.026	0.0014	0.76867	38.4615	2.07101	0.406	0.017	-0.42732		91.3214	6.09629	0.0667565					102.096	5.59145
My_12_tit_95		0.793	0.043	0.02189	0.0012	0.28419	45.683	2.50432	0.2641	0.0084	0.49705		101.913	5.76321	0.0565501					102.439	5.62937
My_12_tit_96		1.813	0.1	0.0227	0.0012	0.58802	44.0529	2.32879	0.569	0.017	0.46603		49.6719	4.19926	0.08454					102.453	5.3772
My_12_tit_97		0.491	0.028	0.01941	0.00099	0.0084138	51.5198	2.62775	0.1859	0.0069	0.61105		102.589	5.3189	0.0518469					102.589	5.3189
My_12_tit_98		0.354	0.021	0.01855	0.00094	0.24649	53.9084	2.73174	0.1344	0.0038	0.42443		105.722	5.3595	0.0506942					102.701	7.33781
My_12_tit_99		0.702	0.05	0.01979	0.0011	0.75545	50.5306	2.80867	0.2539	0.0087	-0.31248		93.7798	5.37915	0.0573594					102.732	5.26032
My_12_tit_100		0.591	0.036	0.01872	0.00097	0.63557	53.4188	2.76796	0.2294	0.0069	0.016737		92.4105	4.88533	0.0528656					102.746	5.09375
My_12_tit_101		1.162	0.07	0.01648	0.00095	0.59598	60.6796	3.49791	0.521	0.016	0.32903		42.4557	3.31267	0.0780265					103.123	5.68999
My_12_tit_102		1.11	0.15	0.0224	0.0017	0.97596	44.6429	3.38807	0.341	0.021	-0.87255		90.4196	7.82433	0.0865336					103.325	7.4054
My_12_tit_103		1.021	0.057	0.0136	0.00074	0.56418	73.5294	4.00087	0.545	0.014	0.36028		32.3586	2.41164	0.0745288					103.453	5.25397
My_12_tit_104		0.469	0.028	0.01957	0.001	0.31203	51.0986	2.61107	0.1718	0.005	0.35237		105.644	5.42944	0.0513936					103.921	5.22916
My_12_tit_105		0.683	0.057	0.01896	0.0011	0.77878	52.7426	3.05996	0.261	0.012	-0.32674		88.7711	5.45313	0.0614291					104.24	5.80433
My_12_tit_106		0.616	0.039	0.01937	0.001	0.47694	51.6262	2.66527	0.2305	0.0081	0.14282		95.4394	5.07057	0.0531287					104.32	5.46576
My_12_tit_107		1.04	0.069	0.02334	0.0012	0.42478	42.8449	2.20282	0.335	0.013	0.2612		95.3409	5.48064	0.0574847					104.634	8.44196
My_12_tit_108		0.638	0.035	0.0198	0.00098	0.40028	50.5051	2.49974	0.2359	0.0053	0.42143		96.693	4.84588	0.0501161					104.719	17.3095
My_12_tit_109		0.829	0.047	0.02266	0.0011	0.13766	44.1306	2.14226	0.2637	0.0085	0.46869		105.563	5.34064	0.050592					104.809	5.47252
My_12_tit_110		0.676	0.039	0.02074	0.0011	0.37048	48.216	2.55726	0.2356	0.0072	0.41884		101.321	5.48776	0.0541621					104.925	5.2692
My_12_tit_111		0.1123	0.0096	0.01556	0.0009	0.14676	64.2674	3.71726	0.0514	0.0043	0.53514		99.1105	5.72826	0.0577967					105.563	5.34064
My_12_tit_112		1.084	0.066	0.01348	0.00073	0.4594	74.184	4.01738	0.58	0.021	0.47087		28.2243	2.8279	0.100194					105.644	5.42944
My_12_tit_113		0.958	0.065	0.02191	0.0013	0.72341	45.6413	2.70806	0.319	0.011	0.067927		92.3278	5.80678	0.062893					105.722	5.3595
My_12_tit_114		1.002	0.064	0.0225	0.0012	0.5811	44.4444	2.37037	0.319	0.011	0.097925		94.8118	5.434	0.0573136					106.026	6.44294
My_12_tit_115		0.97	0.085	0.0222	0.0015	0.79711	45.045	3.04358	0.324	0.016	-0.31013		92.6545	6.87113	0.0741585					106.882	18.6054
My_12_tit_116		0.1256	0.0073	0.0077	0.00039	0.3118	129.87	6.57784	0.1166	0.004	0.43768		45.1098	2.29341	0.0508406					108.655	5.49359
My_12_tit_117		0.399	0.025	0.02033	0.0011	0.33608	49.1884	2.66145	0.1419	0.0053	0.39431		114.598	6.22577	0.0543272					111.115	21.9877
My_12_tit_118		1.118	0.065	0.02445	0.0013	0.28523	40.8998	2.17463	0.333	0.011	0.55755		100.266	5.75508	0.057398					111.427	5.58296
My_12_tit_119		0.396	0.022	0.02675	0.0014	-0.056513	37.3832	1.9565	0.1078	0.0031	0.57118		157.812	8.22016	0.0520882					111.824	6.14961
My_12_tit_120		24.3	2.2	0.217	0.019	0.97464	4.60829	0.403491	0.823	0.015	-0.14492		25.1298	30.2428	1.20346					114.598	6.22577
My_12_tit_121		1.112	0.064	0.01435	0.00075	0.33795	69.6864	3.64215	0.556	0.022	0.34507		32.8614	3.14584	0.0957304					144.553	7.21802
My_12_tit_122		0.63	0.034	0.01921	0.00098	0.32475	52.0562	2.65565	0.2389	0.0073	0.44841		93.3554	4.88113	0.0522854					157.812	8.22016
My_12_tit_123		0.2575	0.015	0.01769	0.00089	0.3705	56.5291	2.84403	0.1056	0.0031	0.27733		104.925	5.2692	0.0502186
My_12_tit_124		0.995	0.056	0.02287	0.0011	0.16432	43.7254	2.1031	0.3127	0.0098	0.48939		97.5295	5.02756	0.0515491
My_12_tit_125		0.862	0.075	0.02297	0.0013	0.87123	43.535	2.46389	0.269	0.013	-0.57989		106.026	6.44294	0.0607674

## Sheet: My13 zircon
Grain		Pb207/U235	Pb207/U235 ±2σ	Pb206/U238	Pb206/U238 ±2σ	Pb206/U238 vs Pb207/U235		Pb206/U238	Pb206/U238 ±2σ	Pb207/Pb206	Pb207/Pb206 ±2σ	Pb206/U238 vs Pb207/Pb206		FinalAge206/238	FinalAge206/238 ±2σ	FinalAge207/206	FinalAge207/206 ±2σ		CONCORDIA CALCULATION														Concordia Age	+/-2s
My13_1		0.101	0.019	0.0144	0.00086	0.20587		0.0144	0.00086	0.053	0.01	0.14071		92.1	5.5	260	340		Concordia Age	+/-2s	MSWD	probability of concordance		0.1	Concordia Age	+/-2s	MSWD	probability of concordance					28.6865	0.941369
My13_2		0.1768	0.0055	0.02591	0.00077	0.72748		0.02591	0.00077	0.0496	0.0011	0.32437		164.8	4.8	169	45		92.352	5.43507	0.409476	0.522235		0.1 = 10% threshold of discordancy	92.352	5.43507	0.409476	0.522235					29.2556	0.785672
My13_3		0.0714	0.0036	0.01076	0.00031	0.49498		0.01076	0.00031	0.0494	0.0028	0.3034		69	2	160	110		165.115	4.45456	0.0517417	0.82006			165.115	4.45456	0.0517417	0.82006					35.6949	1.05091
My13_4		3.186	0.084	0.2525	0.0067	0.45774		0.2525	0.0067	0.0925	0.0028	0.43338		1451	35	1474	58		69.0594	1.96915	0.481066	0.48794			69.0594	1.96915	0.481066	0.48794					39.4245	1.14514
My13_5		0.0729	0.0037	0.0109	0.00026	0.081863		0.0109	0.00026	0.0481	0.0026	0.36278		69.9	1.7	140	100		1453.53	20.2337	0.024113	0.876598			1453.53	20.2337	0.024113	0.876598					39.6365	0.837634
My13_6		1.487	0.029	0.1532	0.0035	0.55217		0.1532	0.0035	0.0697	0.0014	0.51806		918	19	922	40		70.1382	1.54477	0.69263	0.405271			70.1382	1.54477	0.69263	0.405271					40.0837	0.996145
My13_7		0.253	0.011	0.03523	0.00095	0.27219		0.03523	0.00095	0.0522	0.0021	0.28376		223.1	5.9	268	86		924.769	11.8797	0.573511	0.448867			924.769	11.8797	0.573511	0.448867					40.4379	1.45065
My13_8		3.25	0.55	0.0437	0.0052	0.96667		0.0437	0.0052	0.525	0.033	-0.27373		274	32	4264	98		224.587	5.48797	1.56786	0.210518			224.587	5.48797	1.56786	0.210518					41.0672	1.12106
My13_9		1.65	0.11	0.0275	0.0017	0.71387		0.0275	0.0017	0.446	0.026	0.44975		175	11	4032	89								96.2383	9.02142	131.297	2.13246e-30					43.1057	1.23074
My13_10		0.039	0.0015	0.00543	0.00015	0.38474		0.00543	0.00015	0.0519	0.0019	0.16246		34.92	0.95	271	77								73.5187	8.17259	825.052	1.9294e-181					44.4497	1.25177
My13_11		0.0685	0.0067	0.01042	0.00043	-0.0039093		0.01042	0.00043	0.049	0.0054	-0.043139		66.8	2.7	70	180								35.662	0.923729	31.0486	2.51654e-08					47.1058	1.35221
My13_12		0.1503	0.0043	0.02203	0.00061	0.67621		0.02203	0.00061	0.0489	0.001	0.24403		140.5	3.8	145	45		66.8951	2.51675	0.0168643	0.896675			66.8951	2.51675	0.0168643	0.896675					47.6541	1.25458
My13_13		0.0797	0.0032	0.01176	0.00037	0.39204		0.01176	0.00037	0.0484	0.002	0.45627		75.4	2.4	131	84		141.357	3.50145	1.21957	0.269445			141.357	3.50145	1.21957	0.269445					50.4003	1.99625
My13_14		0.0313	0.002	0.00459	0.00014	0.19044		0.00459	0.00014	0.0486	0.0032	0.17828		29.53	0.93	130	130								76.1305	2.17126	2.74329	0.0976638					51.8675	2.21183
My13_15		0.1158	0.0067	0.01671	0.00039	0.19675		0.01671	0.00039	0.0483	0.0028	0.26199		106.8	2.5	120	110								29.7288	0.867754	3.12845	0.0769368					51.9396	1.33877
My13_16		0.0413	0.0025	0.00622	0.00016	0.17809		0.00622	0.00016	0.0479	0.0031	0.25964		39.9	1	130	120		107.2	2.42153	2.08965	0.1483			107.2	2.42153	2.08965	0.1483					51.9538	1.67878
My13_17		0.0637	0.0027	0.00959	0.00031	0.30082		0.00959	0.00031	0.0485	0.0021	0.38025		61.5	2	136	88		40.0837	0.996145	0.820674	0.364983			40.0837	0.996145	0.820674	0.364983					52.4952	2.2581
My13_18		0.0954	0.0054	0.01394	0.00052	0.24596		0.01394	0.00052	0.0484	0.0028	0.31559		89.2	3.3	130	110		61.9006	1.77873	0.737907	0.390332			61.9006	1.77873	0.737907	0.390332					52.8097	4.36846
My13_19		2.047	0.084	0.1909	0.0069	0.62379		0.1909	0.0069	0.0762	0.003	0.3194		1126	37	1091	78		90.0471	3.0423	1.54028	0.214576			90.0471	3.0423	1.54028	0.214576					52.8952	1.60047
My13_20		0.0971	0.0037	0.01441	0.00038	0.14307		0.01441	0.00038	0.0481	0.002	0.47707		92.2	2.4	107	82		1130.52	27.6837	0.116135	0.733264			1130.52	27.6837	0.116135	0.733264					54.6901	2.98896
My13_21		4.05	0.21	0.0435	0.002	0.8856		0.0435	0.002	0.66	0.016	-0.17646		274	12	4650	39		92.8001	2.10198	0.914453	0.338936			92.8001	2.10198	0.914453	0.338936					56.3859	1.32006
My13_22		0.0779	0.0047	0.01129	0.00028	0.16291		0.01129	0.00028	0.0502	0.0034	-0.12987		72.4	1.8	150	120								67.1575	6.27899	1439.37	0					61.9006	1.77873
My13_23		0.0401	0.0012	0.00615	0.00014	0.4147		0.00615	0.00014	0.0468	0.0014	0.37797		39.52	0.91	40	63								72.7272	1.7361	2.84126	0.0918723					61.987	1.50231
My13_24		0.0456	0.0023	0.0069	0.0002	0.37037		0.0069	0.0002	0.0473	0.0023	0.16807		44.3	1.3	86	94		39.6365	0.837634	0.482665	0.487218			39.6365	0.837634	0.482665	0.487218					64.5706	1.68213
My13_25		0.0746	0.0071	0.01008	0.00051	0.26943		0.01008	0.00051	0.0529	0.005	0.10626		64.7	3.3	320	180		44.4497	1.25177	0.797738	0.371771			44.4497	1.25177	0.797738	0.371771					65.4932	2.23175
My13_26		0.0756	0.0073	0.0109	0.00044	-0.050163		0.0109	0.00044	0.0498	0.0058	0.43687		69.9	2.8	200	200								65.5406	3.17888	6.39571	0.0114396					65.629	1.80433
My13_27		0.0924	0.0031	0.01224	0.00034	0.55689		0.01224	0.00034	0.0522	0.0015	0.3633		78.4	2.1	290	62		70.5182	2.55309	1.17774	0.277816			70.5182	2.55309	1.17774	0.277816					66.2071	2.84954
My13_28		0.0584	0.0058	0.00855	0.00047	0.61948		0.00855	0.00047	0.0479	0.0041	-0.082573		54.9	3	100	170								80.6229	2.11261	83.8389	5.36794e-20					66.8951	2.51675
My13_29		0.069	0.0041	0.01075	0.00025	0.073592		0.01075	0.00025	0.0463	0.0029	0.35776		69	1.6	30	110		54.6901	2.98896	1.56251	0.211298			54.6901	2.98896	1.56251	0.211298					67.0757	1.54056
My13_30		0.204	0.02	0.0294	0.0011	0.14084		0.0294	0.0011	0.0496	0.005	0.18748		186.5	6.8	220	190		68.7822	1.51234	0.331128	0.564996			68.7822	1.51234	0.331128	0.564996					67.5088	1.71734
My13_31		0.0547	0.002	0.00798	0.0002	0.18846		0.00798	0.0002	0.0495	0.002	0.47991		51.2	1.3	181	81		186.97	6.6533	0.0391704	0.843111			186.97	6.6533	0.0391704	0.843111					67.7461	1.78267
My13_32		0.315	0.015	0.03298	0.00067	0.026721		0.03298	0.00067	0.0693	0.0037	0.3958		209.1	4.2	820	110								51.9896	1.15248	7.26983	0.00701222					68.7822	1.51234
My13_33		0.093	0.0039	0.01382	0.00045	0.59092		0.01382	0.00045	0.0477	0.0016	0.16742		88.5	2.9	93	65								216.039	3.99203	120.506	4.90269e-28					69.0594	1.96915
My13_34		0.03802	0.00091	0.00549	0.00011	0.48634		0.00549	0.00011	0.0487	0.0011	0.39781		35.3	0.71	134	48		88.8906	2.78004	1.44834	0.228794			88.8906	2.78004	1.44834	0.228794					69.4287	2.38481
My13_35		0.123	0.011	0.01729	0.00063	0.23155		0.01729	0.00063	0.0498	0.0045	0.20833		110.5	4	190	170								36.0263	0.666626	39.3894	3.47177e-10					69.8073	1.74465
My13_36		0.894	0.018	0.0987	0.0021	0.31446		0.0987	0.0021	0.0646	0.0016	0.5614		607	12	755	54		111.006	3.93583	2.18444	0.139412			111.006	3.93583	2.18444	0.139412					70.1382	1.54477
My13_37		0.0439	0.002	0.00669	0.0002	0.39145		0.00669	0.0002	0.0476	0.0021	0.24758		43	1.3	100	85								634.359	8.74248	40.5815	1.88587e-10					70.3604	3.1574
My13_38		0.839	0.022	0.1003	0.002	0.36405		0.1003	0.002	0.0601	0.0013	0.21514		616	12	594	47		43.1057	1.23074	0.473188	0.491524			43.1057	1.23074	0.473188	0.491524					70.5182	2.55309
My13_39		0.0294	0.0016	0.00441	0.00017	0.10758		0.00441	0.00017	0.0489	0.0033	0.51113		28.4	1.1	160	140		617.308	9.86673	0.129114	0.719352			617.308	9.86673	0.129114	0.719352					72.7809	2.04852
My13_40		0.0578	0.0065	0.00809	0.00037	0.064689		0.00809	0.00037	0.0507	0.0059	0.3311		51.9	2.4	180	220		28.6865	0.941369	1.34479	0.246191			28.6865	0.941369	1.34479	0.246191					73.3949	1.93144
My13_41		0.0327	0.0019	0.00429	0.00017	0.3238		0.00429	0.00017	0.055	0.0033	0.44376		27.6	1.1	380	130		52.4952	2.2581	2.44441	0.117944			52.4952	2.2581	2.44441	0.117944					76.0371	2.87757
My13_42		0.0413	0.0017	0.00639	0.00018	0.48294		0.00639	0.00018	0.0469	0.0015	0.2224		41.1	1.2	59	64								28.3898	1.05303	30.5357	3.2778e-08					78.4879	1.85065
My13_43		0.286	0.02	0.0273	0.00079	-0.052204		0.0273	0.00079	0.0755	0.0053	0.17907		173.6	4.9	930	130		41.0672	1.12106	0.00171328	0.966984			41.0672	1.12106	0.00171328	0.966984					78.9058	2.82677
My13_44		0.1163	0.0042	0.01581	0.00034	0.24583		0.01581	0.00034	0.0535	0.002	0.38158		101.1	2.1	329	76								181.234	4.68537	88.8062	4.35448e-21					83.3396	2.11656
My13_45		0.095	0.0041	0.01411	0.00033	0.043678		0.01411	0.00033	0.0481	0.0023	0.42179		90.3	2.1	105	89								102.925	2.05429	29.2566	6.3399e-08					87.3413	1.95857
My13_46		0.0651	0.0028	0.00725	0.00019	0.26929		0.00725	0.00019	0.065	0.0027	0.29544		46.6	1.2	729	82		90.7306	1.87202	0.733747	0.391671			90.7306	1.87202	0.733747	0.391671					87.4487	2.26295
My13_47		0.099	0.0076	0.01108	0.00039	0.066826		0.01108	0.00039	0.0638	0.0052	0.38825		71	2.5	690	160								48.0466	1.19618	175.386	4.93076e-40					88.8906	2.78004
My13_48		0.0728	0.0033	0.01083	0.00029	0.24866		0.01083	0.00029	0.0488	0.0024	0.29835		69.4	1.9	147	95								73.2952	2.39469	45.4217	1.58867e-11					89.0232	2.31327
My13_49		0.0801	0.0036	0.01239	0.00049	0.52384		0.01239	0.00049	0.0466	0.0019	0.25981		79.4	3.1	46	78		69.8073	1.74465	1.4181	0.233717			69.8073	1.74465	1.4181	0.233717					90.0471	3.0423
My13_50		0.0573	0.0092	0.0081	0.00073	0.15437		0.0081	0.00073	0.0512	0.0089	0.38307		52	4.7	230	350		78.9058	2.82677	0.51386	0.473473			78.9058	2.82677	0.51386	0.473473					90.7306	1.87202
My13_51		2.165	0.056	0.1979	0.0033	0.26693		0.1979	0.0033	0.0781	0.0019	0.3973		1164	18	1168	51		52.8097	4.36846	0.955917	0.328218			52.8097	4.36846	0.955917	0.328218					91.2536	2.85177
My13_52		0.0693	0.0037	0.01043	0.00026	0.071242		0.01043	0.00026	0.0488	0.0028	0.38291		66.9	1.7	130	110		1166.89	14.2685	0.289482	0.590553			1166.89	14.2685	0.289482	0.590553					92.352	5.43507
My13_53		0.0512	0.0032	0.00812	0.00022	0.13343		0.00812	0.00022	0.0465	0.0031	0.23043		52.2	1.4	50	120		67.0757	1.54056	0.368308	0.543928			67.0757	1.54056	0.368308	0.543928					92.7908	2.27105
My13_54		0.074	0.0085	0.01092	0.00053	0.037644		0.01092	0.00053	0.053	0.0082	0.15444		70	3.4	120	200		51.9396	1.33877	0.792122	0.373459			51.9396	1.33877	0.792122	0.373459					92.8001	2.10198
My13_55		0.0716	0.0094	0.01035	0.00045	0.43492		0.01035	0.00045	0.0499	0.0057	-0.094151		66.4	2.9	160	220		70.3604	3.1574	0.330633	0.565287			70.3604	3.1574	0.330633	0.565287					93.3179	2.44152
My13_56		0.1336	0.0086	0.01671	0.0005	0.019402		0.01671	0.0005	0.0577	0.0041	0.3759		106.8	3.2	480	140		66.2071	2.84954	0.898538	0.343174			66.2071	2.84954	0.898538	0.343174					93.8057	3.46133
My13_57		0.0912	0.0065	0.01239	0.00078	0.67222		0.01239	0.00078	0.0543	0.003	0.25715		79.3	5	360	120								109.633	2.95913	24.1803	8.77256e-07					94.1278	2.83166
My13_58		0.107	0.016	0.0152	0.0013	0.42449		0.0152	0.0013	0.0471	0.0057	0.074775		97.5	8.1	110	240								81.2801	4.87591	16.263	5.51288e-05					94.262	1.89391
My13_59		0.0522	0.004	0.0081	0.00028	0.093501		0.0081	0.00028	0.0476	0.0038	0.41091		52	1.8	100	140		97.7876	8.16456	0.784913	0.375643			97.7876	8.16456	0.784913	0.375643					96.4953	4.67321
My13_60		3.746	0.084	0.2781	0.007	0.53599		0.2781	0.007	0.0979	0.0023	0.59		1580	35	1578	45		51.9538	1.67878	0.0274413	0.868429			51.9538	1.67878	0.0274413	0.868429					97.7876	8.16456
My13_61		0.0454	0.0029	0.00597	0.00023	0.42657		0.00597	0.00023	0.0547	0.0033	0.15355		38.4	1.5	420	110		1581.25	18.0949	0.00124372	0.971867			1581.25	18.0949	0.00124372	0.971867					98.6737	3.12837
My13_62		0.2442	0.0073	0.03451	0.00079	0.37161		0.03451	0.00079	0.0517	0.0016	0.38041		218.6	4.9	259	68								38.7679	1.46651	27.2726	1.767e-07					101.046	2.38577
My13_63		0.0722	0.0038	0.00764	0.00021	0.38567		0.00764	0.00021	0.0699	0.0035	0.035918		49.1	1.3	894	96		219.814	4.42749	1.035	0.308987			219.814	4.42749	1.035	0.308987					107.2	2.42153
My13_64		0.0424	0.0012	0.00605	0.00013	0.3461		0.00605	0.00013	0.0503	0.0016	0.45149		38.89	0.84	214	66								48.8785	1.34423	167.399	2.7371e-38					109.575	3.10322
My13_65		0.0951	0.0043	0.01452	0.00038	0.25467		0.01452	0.00038	0.0478	0.0023	0.30888		92.9	2.4	106	92								39.7255	0.777055	30.908	2.70559e-08					111.006	3.93583
My13_66		0.0532	0.0056	0.00807	0.00035	0.26318		0.00807	0.00035	0.0487	0.0054	0.35081		51.8	2.3	230	190		92.7908	2.27105	0.111681	0.738239			92.7908	2.27105	0.111681	0.738239					111.769	3.30618
My13_67		0.1019	0.0072	0.01543	0.00054	0.068584		0.01543	0.00054	0.0485	0.0038	0.028768		98.7	3.4	90	140		51.8675	2.21183	0.0958912	0.756817			51.8675	2.21183	0.0958912	0.756817					112.517	3.84818
My13_68		0.0408	0.0038	0.0046	0.00028	0.42284		0.0046	0.00028	0.0635	0.0051	0.29337		29.6	1.8	710	180		98.6737	3.12837	0.00245781	0.96046			98.6737	3.12837	0.00245781	0.96046					113.748	4.3915
My13_69		0.0423	0.0016	0.00585	0.00012	0.36077		0.00585	0.00012	0.0521	0.0017	-0.17596		37.58	0.77	265	67								29.9522	1.79339	42.3954	7.4564e-11					119.268	5.41549
My13_70		0.075	0.0043	0.01134	0.00033	0.29215		0.01134	0.00033	0.0475	0.0027	0.20228		72.7	2.1	90	110								37.9284	0.762538	36.7828	1.3205e-09					141.26	2.78283
My13_71		0.0922	0.0037	0.01329	0.00035	0.33428		0.01329	0.00035	0.0527	0.002	0.27278		85.1	2.2	290	78		72.7809	2.04852	0.138123	0.710154			72.7809	2.04852	0.138123	0.710154					141.357	3.50145
My13_72		0.0299	0.0013	0.00452	0.00013	0.30934		0.00452	0.00013	0.0478	0.0019	0.28856		29.07	0.85	97	81								86.0155	2.11581	6.73274	0.00946589					165.115	4.45456
My13_73		0.0815	0.0065	0.01178	0.00047	0.20631		0.01178	0.00047	0.0495	0.0039	0.30755		75.5	3	190	160		29.2556	0.785672	1.69058	0.193524			29.2556	0.785672	1.69058	0.193524					167.155	3.95792
My13_74		0.0706	0.0052	0.01052	0.00031	-0.079807		0.01052	0.00031	0.0495	0.0042	0.45059		67.7	2	130	150		76.0371	2.87757	1.69863	0.192467			76.0371	2.87757	1.69863	0.192467					186.97	6.6533
My13_75		0.0538	0.0057	0.00781	0.00032	0.14621		0.00781	0.00032	0.0502	0.0053	0.24732		50.2	2	170	180		67.7461	1.78267	0.437492	0.508335			67.7461	1.78267	0.437492	0.508335					219.814	4.42749
My13_76		0.0685	0.0076	0.01018	0.00037	-0.020214		0.01018	0.00037	0.0481	0.0058	0.42583		65.3	2.4	170	210		50.4003	1.99625	1.20061	0.273201			50.4003	1.99625	1.20061	0.273201					224.587	5.48797
My13_77		0.0774	0.0042	0.0112	0.00034	-0.019033		0.0112	0.00034	0.0493	0.0032	0.49338		71.8	2.1	170	120		65.4932	2.23175	0.268549	0.604307			65.4932	2.23175	0.268549	0.604307					565.422	17.3361
My13_78		0.0466	0.0037	0.00735	0.00022	0.10205		0.00735	0.00022	0.0461	0.0038	0.19876		47.2	1.4	20	140								72.7119	1.88791	2.93003	0.0869461					617.308	9.86673
My13_79		0.1046	0.0038	0.0158	0.0004	0.39014		0.0158	0.0004	0.0471	0.0015	0.25109		101	2.5	75	65		47.1058	1.35221	0.26673	0.605534			47.1058	1.35221	0.26673	0.605534					923.798	15.5404
My13_80		0.75	0.04	0.0914	0.0033	0.35694		0.0914	0.0033	0.0583	0.003	0.39458		566	19	540	100		101.046	2.38577	0.000642135	0.979783			101.046	2.38577	0.000642135	0.979783					924.769	11.8797
My13_81		0.0929	0.0052	0.01354	0.0004	0.010227		0.01354	0.0004	0.05	0.0029	0.37742		86.7	2.6	190	110		565.422	17.3361	0.130345	0.718074			565.422	17.3361	0.130345	0.718074					1130.52	27.6837
My13_82		0.174	0.0071	0.02362	0.00074	0.35406		0.02362	0.00074	0.0547	0.0022	0.40665		150.5	4.6	396	92		87.4487	2.26295	1.65512	0.198263			87.4487	2.26295	1.65512	0.198263					1166.89	14.2685
My13_83		0.0823	0.0046	0.01189	0.00044	0.12501		0.01189	0.00044	0.0506	0.0031	0.20124		76.2	2.8	210	110								154.098	4.28793	15.5604	7.99121e-05					1453.53	20.2337
My13_84		5.073	0.094	0.3244	0.0072	0.66062		0.3244	0.0072	0.114	0.0019	0.6309		1809	35	1858	30								77.3031	2.48067	2.87121	0.0901772					1581.25	18.0949
My13_85		0.0724	0.004	0.01074	0.00041	0.25366		0.01074	0.00041	0.0491	0.0028	0.38386		68.8	2.6	170	110		1834.58	15.3553	2.20978	0.137139			1834.58	15.3553	2.20978	0.137139					1834.58	15.3553
My13_86		0.0687	0.0026	0.01053	0.00029	0.37628		0.01053	0.00029	0.0477	0.0017	0.31548		67.5	1.9	86	72		69.4287	2.38481	1.099	0.294485			69.4287	2.38481	1.099	0.294485
My13_87		1.957	0.042	0.1911	0.0039	0.63772		0.1911	0.0039	0.0743	0.0012	0.4053		1129	21	1055	33		67.5088	1.71734	0.00242333	0.960738			67.5088	1.71734	0.00242333	0.960738
My13_88		0.0773	0.0045	0.01068	0.00027	0.18658		0.01068	0.00027	0.0534	0.0031	0.18715		68.7	1.7	310	120								1102.34	14.45	10.3922	0.00126551
My13_89		0.0566	0.0016	0.00886	0.00024	0.47659		0.00886	0.00024	0.0468	0.0013	0.37939		56.9	1.5	52	56								69.1015	1.68288	11.0525	0.000885686
My13_90		0.1497	0.0046	0.02213	0.00048	0.33967		0.02213	0.00048	0.0493	0.0014	0.31534		141.1	3	163	60		56.3859	1.32006	1.48973	0.222258			56.3859	1.32006	1.48973	0.222258
My13_91		0.0349	0.0025	0.00559	0.00019	-0.087765		0.00559	0.00019	0.0438	0.0035	0.46842		35.9	1.2	-50	130		141.26	2.78283	0.0679803	0.794301			141.26	2.78283	0.0679803	0.794301
My13_92		0.174	0.01	0.00962	0.00028	0.14925		0.00962	0.00028	0.1311	0.0077	0.34881		61.7	1.8	2050	110		35.6949	1.05091	0.606114	0.436255			35.6949	1.05091	0.606114	0.436255
My13_93		0.121	0.016	0.01776	0.00074	-0.050698		0.01776	0.00074	0.0491	0.0067	0.26844		113.5	4.7	200	250								62.4961	1.7875	506.274	4.10135e-112
My13_94		0.0833	0.0042	0.01219	0.0003	0.23123		0.01219	0.0003	0.0491	0.0025	0.32728		78.1	1.9	172	99		113.748	4.3915	0.103985	0.747099			113.748	4.3915	0.103985	0.747099
My13_95		0.0746	0.0044	0.01146	0.00032	0.15356		0.01146	0.00032	0.0474	0.0031	0.17878		73.5	2.1	70	120		78.4879	1.85065	2.5017	0.113723			78.4879	1.85065	2.5017	0.113723
My13_96		0.113	0.012	0.01767	0.00063	0.090531		0.01767	0.00063	0.047	0.0049	0.27518		112.9	4	110	180		73.3949	1.93144	0.0340379	0.853626			73.3949	1.93144	0.0340379	0.853626
My13_97		0.1	0.0058	0.01459	0.00049	0.12575		0.01459	0.00049	0.0497	0.0032	0.42812		93.3	3.1	170	120		112.517	3.84818	0.555526	0.456068			112.517	3.84818	0.555526	0.456068
My13_98		0.0498	0.0027	0.00675	0.00019	0.30725		0.00675	0.00019	0.054	0.0029	0.26793		43.4	1.2	340	110		94.1278	2.83166	1.35183	0.244958			94.1278	2.83166	1.35183	0.244958
My13_99		0.028	0.0018	0.00406	0.00016	0.53204		0.00406	0.00016	0.0492	0.0026	0.073969		26.1	1	180	110								43.8351	1.20127	22.4038	2.2094e-06
My13_100		0.0665	0.0032	0.00974	0.00023	0.24693		0.00974	0.00023	0.0486	0.0017	-0.18424		62.5	1.5	121	63								26.189	1.02617	6.4741	0.0109457
My13_101		0.089	0.004	0.01367	0.00033	0.18224		0.01367	0.00033	0.0468	0.002	0.20457		87.5	2.1	54	82								62.8124	1.42862	3.60336	0.0576628
My13_102		0.113	0.012	0.01716	0.00053	-0.10649		0.01716	0.00053	0.0478	0.0052	0.14706		109.7	3.4	20	180		87.3413	1.95857	0.235348	0.627586			87.3413	1.95857	0.235348	0.627586
My13_103		0.0961	0.0044	0.01459	0.00043	0.17456		0.01459	0.00043	0.0475	0.0023	0.37626		93.4	2.7	76	93		109.575	3.10322	0.0274388	0.868435			109.575	3.10322	0.0274388	0.868435
My13_104		0.184	0.018	0.0201	0.00056	0.22814		0.0201	0.00056	0.0679	0.0063	-0.0057222		128.3	3.6	670	160		93.3179	2.44152	0.00821213	0.927794			93.3179	2.44152	0.00821213	0.927794
My13_105		0.0946	0.0063	0.01382	0.0004	-0.02434		0.01382	0.0004	0.0499	0.0038	0.03626		88.5	2.6	130	130								128.205	3.54144	31.6797	1.81809e-08
My13_106		0.0978	0.0063	0.01416	0.00047	0.20406		0.01416	0.00047	0.0488	0.0034	0.37631		90.6	3	170	140		89.0232	2.31327	1.05059	0.305371			89.0232	2.31327	1.05059	0.305371
My13_107		0.1	0.0041	0.01464	0.00032	0.147		0.01464	0.00032	0.0483	0.0021	0.34564		93.7	2	130	86		91.2536	2.85177	1.87511	0.170891			91.2536	2.85177	1.87511	0.170891
My13_108		0.0695	0.0043	0.00774	0.00021	0.1804		0.00774	0.00021	0.066	0.0042	0.22916		49.7	1.3	710	130		94.262	1.89391	2.34219	0.125913			94.262	1.89391	2.34219	0.125913
My13_109		0.0503	0.0024	0.00721	0.00021	0.39443		0.00721	0.00021	0.05	0.0022	0.2311		46.3	1.4	196	90								50.5801	1.33021	81.8067	1.5007e-19
My13_110		0.1025	0.0095	0.01436	0.00071	-0.28793		0.01436	0.00071	0.0539	0.0051	0.47193		91.9	4.5	310	180								46.7376	1.31883	10.4296	0.00124009
My13_111		0.067	0.0039	0.01002	0.00029	0.037863		0.01002	0.00029	0.0484	0.003	0.40281		64.3	1.9	120	120		93.8057	3.46133	1.71158	0.19078			93.8057	3.46133	1.71158	0.19078
My13_112		0.1084	0.005	0.01535	0.00046	0.3717		0.01535	0.00046	0.0528	0.0022	0.32661		98.2	2.9	293	86		64.5706	1.68213	0.59533	0.440366			64.5706	1.68213	0.59533	0.440366
My13_113		0.0805	0.0041	0.01133	0.00034	0.020091		0.01133	0.00034	0.0514	0.0029	0.46359		72.6	2.2	250	110								99.3325	2.81125	8.06906	0.00450275
My13_114		0.101	0.0096	0.01504	0.00078	0.215		0.01504	0.00078	0.0497	0.0052	0.32096		96.2	5	170	200								74.0321	1.90777	7.43521	0.006396
My13_115		0.128	0.016	0.01857	0.00097	-0.1062		0.01857	0.00097	0.0499	0.007	0.49058		118.6	6.1	140	250		96.4953	4.67321	0.10224	0.749157			96.4953	4.67321	0.10224	0.749157
My13_116		0.0416	0.0018	0.00555	0.00019	0.60729		0.00555	0.00019	0.0536	0.0019	0.14043		35.7	1.2	351	77		119.268	5.41549	0.205512	0.650308			119.268	5.41549	0.205512	0.650308
My13_117		0.1188	0.0091	0.01585	0.00047	-0.054321		0.01585	0.00047	0.0541	0.0041	0.12551		101.4	3	290	140								36.1989	1.21184	65.7918	5.01157e-16
My13_118		1.26	0.14	0.0247	0.0016	0.93237		0.0247	0.0016	0.362	0.022	-0.45809		156.9	9.8	3722	91								102.972	2.75864	7.89365	0.00496086
My13_119		0.0416	0.0028	0.00626	0.00024	0.21917		0.00626	0.00024	0.0483	0.0033	0.39114		40.2	1.5	140	130								78.6766	3.96937	284.149	9.36279e-64
My13_120		0.0488	0.0033	0.00739	0.00023	-0.14757		0.00739	0.00023	0.0494	0.004	0.49908		47.5	1.5	150	160		40.4379	1.45065	0.669611	0.413187			40.4379	1.45065	0.669611	0.413187
My13_121		0.0896	0.0047	0.01156	0.00029	0.099155		0.01156	0.00029	0.0558	0.0031	0.33631		74.1	1.9	390	110		47.6541	1.25458	0.243512	0.621681			47.6541	1.25458	0.243512	0.621681
My13_122		0.0604	0.0042	0.00824	0.00025	0.1063		0.00824	0.00025	0.0555	0.0042	0.23749		52.9	1.6	390	140								75.6887	1.76145	32.0444	1.50692e-08
My13_123		0.052	0.0015	0.00565	0.00013	0.34632		0.00565	0.00013	0.0676	0.002	0.47492		36.3	0.83	834	63								53.6111	1.53571	10.1228	0.00146445
My13_124		0.1104	0.0087	0.01447	0.00048	0.25523		0.01447	0.00048	0.0558	0.0045	0.13033		92.6	3.1	370	140								38.3981	0.81153	463.67	7.64224e-103
My13_125		0.0678	0.0037	0.0102	0.0003	0.19412		0.0102	0.0003	0.0486	0.0029	0.38542		65.4	1.9	140	110								93.291	3.02684	12.3497	0.000441067
My13_126		0.0865	0.004	0.01298	0.00035	0.27856		0.01298	0.00035	0.0484	0.002	0.13352		83.1	2.2	124	79		65.629	1.80433	0.420539	0.516668			65.629	1.80433	0.420539	0.516668
My13_127		0.0648	0.0032	0.00963	0.00024	0.30611		0.00963	0.00024	0.0486	0.0024	0.24049		61.8	1.6	139	96		83.3396	2.11656	0.338836	0.560502			83.3396	2.11656	0.338836	0.560502
My13_128		0.0387	0.0024	0.00572	0.00032	0.56527		0.00572	0.00032	0.0494	0.0028	0.36964		36.8	2	160	120		61.987	1.50231	1.76118	0.184477			61.987	1.50231	1.76118	0.184477
My13_129		0.155	0.014	0.00953	0.00038	0.05383		0.00953	0.00038	0.12	0.01	0.12653		61.1	2.5	1880	170								37.388	1.9217	2.98097	0.0842489
My13_130		0.039	0.0019	0.00617	0.0002	0.19712		0.00617	0.0002	0.0465	0.0023	0.42312		39.6	1.3	38	93								63.1763	2.40704	173.916	1.03282e-39
My13_131		0.1	0.0056	0.0141	0.00042	0.36119		0.0141	0.00042	0.0526	0.0031	0.2051		90.2	2.7	290	120		39.4245	1.14514	0.623785	0.429644			39.4245	1.14514	0.623785	0.429644
My13_132		0.1178	0.0046	0.01736	0.00058	0.44229		0.01736	0.00058	0.0496	0.0017	0.39845		110.9	3.7	174	69								90.8339	2.63624	7.06878	0.00784386
My13_133		0.0839	0.0064	0.00967	0.00026	-0.11462		0.00967	0.00026	0.0606	0.005	0.37964		62.1	1.6	540	150		111.769	3.30618	1.03719	0.308476			111.769	3.30618	1.03719	0.308476
My13_134		0.1138	0.0088	0.01556	0.00057	0.023678		0.01556	0.00057	0.0525	0.0045	0.44918		99.6	3.6	290	170								63.883	1.54783	37.5257	9.02182e-10
My13_135		0.1092	0.0063	0.0145	0.00043	0.28386		0.0145	0.00043	0.0549	0.0031	0.32948		92.8	2.8	390	110								101.131	3.33199	5.11809	0.0236776
My13_136		0.1806	0.0079	0.02621	0.00067	0.26818		0.02621	0.00067	0.0511	0.0023	0.28089		166.7	4.2	224	91								93.9383	2.68418	19.2415	1.15183e-05
My13_137		0.0563	0.0044	0.00819	0.00026	0.11095		0.00819	0.00026	0.0495	0.0041	0.3019		52.6	1.7	190	150		167.155	3.95792	0.264025	0.607368			167.155	3.95792	0.264025	0.607368
My13_138		0.0443	0.0029	0.00642	0.00021	0.092826		0.00642	0.00021	0.0495	0.0034	0.35669		41.2	1.4	170	130		52.8952	1.60047	1.92268	0.165561			52.8952	1.60047	1.92268	0.165561
My13_139		0.253	0.018	0.02367	0.00067	0.049542		0.02367	0.00067	0.0781	0.0058	0.27954		150.8	4.2	1070	150								41.6966	1.2559	3.35618	0.0669532
My13_140		1.481	0.043	0.1544	0.0036	0.38229		0.1544	0.0036	0.0703	0.002	0.29314		925	20	926	57								155.382	4.12115	101.846	6.00063e-24
My13_141		0.1202	0.004	0.01729	0.00053	0.66453		0.01729	0.00053	0.0508	0.0013	0.32741		110.5	3.4	221	55		923.798	15.5404	0.0776206	0.780548			923.798	15.5404	0.0776206	0.780548
																									112.323	3.17404	10.871	0.000976829

## Sheet: PlotDat3
Source sheet	My13 titanite	0.2	27.2083	1	23.9699	4.34717	0.85	19.6227
Plot name	Average3	11.8	27.2083	2	24.4254	4.48698	1.15	19.6227
Plot Type	15			3	24.9734	2.39008	1.15	28.317
1st free col	8			4	27.0114	3.81025	0.85	28.317
Sigma Level	2			5	27.0184	3.00926	0.85	19.6227
Absolute Errs	TRUE			6	27.8377	3.03256	ErrBox	ErrBox
Symbol Type	1			7	28.4774	3.12873	1.85	19.9384
Inverse Plot	FALSE			8	28.9456	3.21112	2.15	19.9384
Color Plot	TRUE			9	29.0773	2.88675	2.15	28.9124
3D plot	FALSE			10	29.2456	5.16639	1.85	28.9124
Linear	FALSE			11	29.2997	5.5408	1.85	19.9384
Data Range	U2:V12			IsoLine	IsoLine	IsoLine	ErrBox	ErrBox
Filled Symbols	TRUE						2.85	22.5834
ConcAge	FALSE						3.15	22.5834
ConcSwap	FALSE						3.15	27.3635
1st Symbol-row	1						2.85	27.3635
							2.85	22.5834
							ErrBox	ErrBox
							3.85	23.2012
							4.15	23.2012
							4.15	30.8216
							3.85	30.8216
							3.85	23.2012
							ErrBox	ErrBox
							4.85	24.0091
							5.15	24.0091
							5.15	30.0277
							4.85	30.0277
							4.85	24.0091
							ErrBox	ErrBox
							5.85	24.8051
							6.15	24.8051
							6.15	30.8702
							5.85	30.8702
							5.85	24.8051
							ErrBox	ErrBox
							6.85	25.3487
							7.15	25.3487
							7.15	31.6062
							6.85	31.6062
							6.85	25.3487
							ErrBox	ErrBox
							7.85	25.7345
							8.15	25.7345
							8.15	32.1567
							7.85	32.1567
							7.85	25.7345
							ErrBox	ErrBox
							8.85	26.1906
							9.15	26.1906
							9.15	31.9641
							8.85	31.9641
							8.85	26.1906
							ErrBox	ErrBox
							9.85	24.0792
							10.15	24.0792
							10.15	34.412
							9.85	34.412
							9.85	24.0792
							ErrBox	ErrBox
							10.85	23.7589
							11.15	23.7589
							11.15	34.8405
							10.85	34.8405
							10.85	23.7589
							ErrBox	ErrBox

## Sheet: My13 titanite
Grain		Pb207/U235	Pb207/U235 ±2σ	Pb206/U238	Pb206/U238 ±2σ	Pb206/U238 vs Pb207/U235	Pb206/U238	Pb206/U238 ±2σ	Pb207/Pb206	Pb207/Pb206 ±2σ	Pb206/U238 vs Pb207/Pb206		207CorrAge	2SigAbs	%					207CorrAge	2SigAbs
My_13_tit_1		0.94	0.062	0.01505	0.00083	0.40149	66.4452	3.66442	0.448	0.015	-0.010684		47.6983	3.23877	0.0679012					23.9699	4.34717
My_13_tit_2		3.16	0.63	0.041	0.005	0.98718	24.3902	2.97442	0.51	0.049	-0.94992		109.745	20.9265	0.190684					24.4254	4.48698
My_13_tit_3		3.86	0.38	0.0357	0.0031	0.94857	28.0112	2.43235	0.784	0.018	-0.2376		15.2991	5.85501	0.382702					24.9734	2.39008
My_13_tit_4		6.86	0.62	0.0619	0.0056	0.96175	16.1551	1.46153	0.801	0.019	0.1528		18.035	10.5085	0.582672					27.0114	3.81025
My_13_tit_5		1.06	0.15	0.0169	0.0015	0.98166	59.1716	5.25192	0.451	0.024	-0.75435		53.1596	5.76454	0.108438					27.0184	3.00926
My_13_tit_6		1.45	0.33	0.0191	0.0029	0.97739	52.356	7.94934	0.511	0.046	-0.82845		50.7824	10.4975	0.206715					27.8377	3.03256
My_13_tit_7		1.329	0.08	0.01567	0.00091	0.32554	63.8162	3.70598	0.614	0.02	0.12236		28.4774	3.12873	0.109867					28.4774	3.12873
My_13_tit_8		0.917	0.095	0.01493	0.001	0.88881	66.9792	4.48622	0.45	0.026	-0.52216		47.0748	4.4752	0.0950656					28.9456	3.21112
My_13_tit_9		1.77	0.16	0.0202	0.0016	0.91297	49.505	3.92118	0.635	0.021	-0.25092		33.2891	4.45162	0.133726					29.0773	2.88675
My_13_tit_10		0.702	0.042	0.0209	0.001	0.28798	47.8469	2.28932	0.2449	0.008	0.29321		100.539	4.98167	0.0495495					29.2456	5.16639
My_13_tit_11		0.578	0.033	0.0133	0.00071	0.4919	75.188	4.01379	0.315	0.0083	0.28313		56.4963	3.15126	0.0557781					29.2997	5.5408
My_13_tit_12		0.652	0.04	0.0207	0.001	0.13791	48.3092	2.33378	0.2335	0.0095	0.40435		101.475	5.13492	0.0506026					30.0539	3.18571
My_13_tit_13		45	69	-2.8	5.2	-0.15749	-0.357143	0.663265	-5.6	6.1	0.4053		0	306753	#DIV/0!					30.2731	4.17479
My_13_tit_14		1.053	0.087	0.02273	0.0013	0.87522	43.9947	2.5162	0.334	0.013	-0.58019		93.0336	5.82804	0.0626445					30.7047	3.17932
My_13_tit_15		0.785	0.047	0.0144	0.00073	0.83072	69.4444	3.52045	0.393	0.011	-0.22534		52.0656	2.95818	0.0568163					31.2171	2.23487
My_13_tit_16		0.457	0.027	0.01701	0.00092	0.46955	58.7889	3.17965	0.1949	0.0063	0.37984		88.7122	4.85749	0.0547555					32.3837	3.37839
My_13_tit_17		0.503	0.029	0.01535	0.00079	0.19837	65.1466	3.35282	0.2404	0.0093	0.47975		74.4478	3.99393	0.0536473					32.7839	2.47898
My_13_tit_18		2.262	0.15	0.0236	0.0014	0.85118	42.3729	2.51365	0.71	0.021	0.25714		24.4254	4.48698	0.183701					32.9733	2.91913
My_13_tit_19		4.07	0.23	0.0389	0.0021	0.80735	25.7069	1.38778	0.764	0.019	0.60141		23.1444	6.58994	0.284731					33.2891	4.45162
My_13_tit_20		0.294	0.019	0.00898	0.00045	0.50149	111.359	5.58033	0.2386	0.0084	-0.065049		43.7196	2.27434	0.0520211					33.6493	2.33018
My_13_tit_21		0.648	0.081	0.00948	0.00093	0.97758	105.485	10.3482	0.487	0.018	-0.76129		27.0184	3.00926	0.111378					34.3192	4.35292
My_13_tit_22		2.311	0.14	0.02352	0.0014	0.43759	42.517	2.53077	0.721	0.024	0.54298		22.2167	4.96724	0.223582					34.854	2.37673
My_13_tit_23		0.825	0.048	0.02214	0.0012	0.37499	45.1671	2.44808	0.2721	0.0083	0.33986		101.651	5.69039	0.0559795					37.32	2.05577
My_13_tit_24		1.113	0.072	0.01445	0.00078	0.5309	69.2042	3.73559	0.557	0.019	0.18438		32.9733	2.91913	0.0885299					39.2591	4.5425
My_13_tit_25		0.744	0.047	0.02042	0.001	0.30683	48.9716	2.39822	0.2663	0.0094	0.22603		94.7219	4.88062	0.0515258					40.2316	3.2188
My_13_tit_26		0.845	0.052	0.01233	0.00063	0.62196	81.103	4.14395	0.502	0.015	-0.063329		33.6493	2.33018	0.0692491					43.1672	2.38253
My_13_tit_27		1.122	0.084	0.01975	0.0011	0.79511	50.6329	2.82006	0.407	0.015	-0.33428		69.1859	4.5618	0.0659355					43.2492	2.28036
My_13_tit_28		0.2232	0.014	0.00828	0.00043	0.63395	120.773	6.27203	0.1949	0.0061	-0.092559		43.2492	2.28036	0.0527261					43.7196	2.27434
My_13_tit_29		0.802	0.044	0.01381	0.0007	0.29727	72.4113	3.67038	0.426	0.014	0.45569		46.2315	2.8487	0.0616182					44.0062	2.96856
My_13_tit_30		0.454	0.026	0.01942	0.00097	0.4956	51.4933	2.57201	0.1717	0.005	0.40247		104.853	5.27042	0.0502648					44.1185	2.43841
My_13_tit_31		0.711	0.049	0.01378	0.00075	0.70084	72.5689	3.94969	0.376	0.014	-0.14453		51.723	3.23511	0.0625467					44.2146	2.9511
My_13_tit_32		2.03	0.11	0.02177	0.0013	0.25303	45.9348	2.743	0.672	0.029	0.57667		29.2997	5.5408	0.189108					44.4729	3.20997
My_13_tit_33		0.386	0.023	0.01766	0.00089	0.29961	56.6251	2.8537	0.1584	0.0052	0.29402		97.2701	4.93533	0.0507384					44.5337	2.54254
My_13_tit_34		2.95	0.31	0.0296	0.0027	0.96287	33.7838	3.08163	0.716	0.017	-0.30287		29.2456	5.16639	0.176655					45.04	2.25167
My_13_tit_35		1.353	0.085	0.0196	0.0011	0.87943	51.0204	2.86339	0.5045	0.0096	-0.13835		53.1522	3.4281	0.0644958					45.0795	3.44795
My_13_tit_36		0.76	0.14	0.013	0.0014	0.96969	76.9231	8.28402	0.386	0.028	-0.79152		47.7397	5.92599	0.124131					45.9603	2.71965
My_13_tit_37		0.826	0.048	0.02156	0.0012	0.34699	46.3822	2.58157	0.2813	0.0098	0.46724		97.3984	5.66954	0.0582098					46.028	2.97715
My_13_tit_38		0.652	0.043	0.01834	0.00098	0.35573	54.5256	2.91358	0.263	0.013	0.23853		85.5783	4.95057	0.0578484					46.2315	2.8487
My_13_tit_39		1.8	1.1	0.024	0.013	0.89212	41.6667	22.5694	4	14	0.32249		-687.456	3155.4	-4.58996					47.0748	4.4752
My_13_tit_40		1.69	0.27	0.042	0.003	0.95027	23.8095	1.70068	0.282	0.031	-0.72761		189.201	16.8868	0.089253					47.4907	2.66961
My_13_tit_41		0.66	0.038	0.02621	0.0013	0.2725	38.1534	1.89238	0.1813	0.0071	0.22402		139.319	7.02474	0.050422					47.6983	3.23877
My_13_tit_42		1.446	0.094	0.01712	0.00092	0.64515	58.4112	3.13892	0.605	0.02	0.075119		32.3837	3.37839	0.104324					47.7255	2.51777
My_13_tit_43		2.35	0.13	0.02597	0.0014	0.6336	38.506	2.07579	0.652	0.018	0.2259		39.2591	4.5425	0.115706					47.7397	5.92599
My_13_tit_44		0.856	0.053	0.01454	0.00075	0.6918	68.7758	3.54758	0.433	0.014	-0.052808		47.8514	3.00103	0.0627156					47.8514	3.00103
My_13_tit_45		0.83	0.047	0.01233	0.00066	0.48224	81.103	4.34128	0.49	0.014	0.39427		34.854	2.37673	0.068191					47.9759	3.16106
My_13_tit_46		0.4457	0.024	0.00929	0.00049	0.57555	107.643	5.6776	0.3435	0.0074	0.55049		37.32	2.05577	0.0550848					48.3405	2.74066
My_13_tit_47		0.427	0.028	0.01019	0.00053	0.6301	98.1354	5.1042	0.305	0.0098	-0.24716		44.1185	2.43841	0.0552695					48.3769	5.17186
My_13_tit_48		0.806	0.061	0.01984	0.0011	0.67129	50.4032	2.79453	0.285	0.013	-0.21697		89.0494	5.34793	0.0600557					48.9283	6.57646
My_13_tit_49		0.569	0.031	0.01864	0.00099	0.49473	53.6481	2.84933	0.2209	0.0067	0.39232		93.2907	5.03903	0.0540143					49.4324	2.53162
My_13_tit_50		0.425	0.026	0.01695	0.00085	0.57034	58.9971	2.95855	0.1817	0.0056	-0.042704		90.1996	4.57016	0.0506672					49.4975	7.93883
My_13_tit_51		5.99	0.37	0.0539	0.0031	0.82819	18.5529	1.06705	0.792	0.017	0.25019		19.6976	8.29538	0.421137					49.8326	3.02717
My_13_tit_52		0.9	0.054	0.0114	0.00059	0.30428	87.7193	4.53986	0.568	0.021	0.36158		24.9734	2.39008	0.095705					50.3512	5.54945
My_13_tit_53		0.819	0.056	0.01357	0.00074	0.86363	73.692	4.01858	0.437	0.015	-0.41289		44.2146	2.9511	0.0667451					50.6093	4.12803
My_13_tit_54		2.613	0.16	0.028	0.0015	0.70129	35.7143	1.91326	0.687	0.016	0.12742		34.3192	4.35292	0.126836					51.2936	2.77854
My_13_tit_55		0.757	0.04	0.01353	0.00067	0.017187	73.9098	3.65998	0.406	0.011	0.58726		47.4907	2.66961	0.0562134					51.723	3.23511
My_13_tit_56		1.88	0.2	0.026	0.0019	0.96436	38.4615	2.81065	0.528	0.021	-0.79238		65.6153	6.58521	0.100361					51.7807	4.76408
My_13_tit_57		0.657	0.037	0.01223	0.00065	0.62583	81.7661	4.34571	0.3898	0.0088	0.17053		44.5337	2.54254	0.0570925					52.0656	2.95818
My_13_tit_58		2.69	0.17	0.0388	0.0021	0.67526	25.7732	1.39494	0.503	0.013	0.09781		106.018	7.14922	0.0674341					52.5053	5.3565
My_13_tit_59		1.621	0.1	0.01811	0.00099	0.52701	55.2181	3.01855	0.654	0.023	0.3291		27.0114	3.81025	0.141061					53.1522	3.4281
My_13_tit_60		0.1639	0.0089	0.00804	0.0004	0.2962	124.378	6.18797	0.1482	0.004	0.58555		45.04	2.25167	0.0499926					53.1596	5.76454
My_13_tit_61		1.06	0.087	0.01356	0.00088	0.87896	73.7463	4.7859	0.575	0.023	-0.2045		28.9456	3.21112	0.110936					53.1836	2.88521
My_13_tit_62		0.376	0.022	0.0111	0.00056	0.62824	90.0901	4.54509	0.2471	0.0066	0.0064219		53.2623	2.75082	0.0516466					53.2623	2.75082
My_13_tit_63		1.982	0.13	0.03069	0.0016	0.73256	32.5839	1.69874	0.473	0.014	-0.067785		91.2108	5.96025	0.0653459					53.5906	4.29947
My_13_tit_64		0.452	0.053	0.01033	0.00061	0.87332	96.8054	5.71649	0.308	0.022	-0.62686		44.4729	3.20997	0.0721781					53.9029	2.84249
My_13_tit_65		2.141	0.13	0.02212	0.0012	0.60265	45.208	2.45251	0.704	0.022	0.39919		23.9699	4.34717	0.18136					56.4963	3.15126
My_13_tit_66		0.28	0.019	0.01098	0.00056	0.51917	91.0747	4.64497	0.1802	0.0067	-0.034823		58.6297	3.0422	0.0518884					57.7998	4.60084
My_13_tit_67		1.252	0.073	0.01505	0.00078	0.26864	66.4452	3.44367	0.61	0.021	0.34454		27.8377	3.03256	0.108937					57.865	3.12265
My_13_tit_68		0.864	0.065	0.01465	0.00081	0.83613	68.2594	3.77407	0.435	0.014	-0.40448		47.9759	3.16106	0.0658885					58.6297	3.0422
My_13_tit_69		0.665	0.042	0.01036	0.00058	0.48715	96.5251	5.40391	0.467	0.016	0.38172		31.2171	2.23487	0.0715911					60.5487	6.54832
My_13_tit_70		0.57	0.05	0.01778	0.00091	0.63952	56.243	2.87858	0.234	0.015	-0.40459		87.1232	4.93682	0.0566648					60.932	4.58847
My_13_tit_71		0.2	0.018	0.01405	0.00071	0.70226	71.1744	3.59671	0.1017	0.0061	-0.49529		83.8581	4.27549	0.0509848					64.9094	11.0251
My_13_tit_72		1.471	0.11	0.02785	0.0014	0.68295	35.9066	1.805	0.394	0.014	-0.10331		100.525	5.97504	0.0594383					65.6153	6.58521
My_13_tit_73		0.72	0.11	0.01378	0.0012	0.96634	72.5689	6.3195	0.369	0.025	-0.69228		52.5053	5.3565	0.102018					69.1859	4.5618
My_13_tit_74		0.312	0.019	0.01687	0.00086	0.46865	59.2768	3.02182	0.1341	0.0043	0.22414		96.2265	4.917	0.0510982					69.9435	4.55393
My_13_tit_75		0.949	0.081	0.01553	0.00093	0.67541	64.3915	3.85603	0.437	0.022	-0.025141		50.6093	4.12803	0.0815666					72.8405	9.03955
My_13_tit_76		0.789	0.047	0.01365	0.0007	0.20099	73.2601	3.75693	0.423	0.016	0.4585		46.028	2.97715	0.0646814					74.2823	4.06625
My_13_tit_77		5.8	1.7	0.058	0.016	0.99364	17.2414	4.75624	0.749	0.027	-0.40153		42.0568	17.5252	0.416702					74.4478	3.99393
My_13_tit_78		0.874	0.072	0.02242	0.0012	0.73156	44.603	2.38732	0.285	0.014	-0.37532		100.609	5.93507	0.0589911					83.8581	4.27549
My_13_tit_79		1.996	0.11	0.02437	0.0013	-0.02263	41.0341	2.18893	0.594	0.022	0.69865		48.3769	5.17186	0.106908					85.5783	4.95057
My_13_tit_80		1.24	0.13	0.0151	0.0013	0.91065	66.2252	5.7015	0.591	0.026	-0.31527		30.2731	4.17479	0.137904					87.1232	4.93682
My_13_tit_81		1.22	0.12	0.01937	0.0012	0.91952	51.6262	3.19832	0.471	0.018	-0.56408		57.7998	4.60084	0.0795996					87.9184	4.66612
My_13_tit_82		0.561	0.033	0.01989	0.001	0.35616	50.2765	2.52773	0.2098	0.0079	0.41343		101.302	5.22752	0.0516035					88.7122	4.85749
My_13_tit_83		0.322	0.025	0.01711	0.00085	0.15388	58.4454	2.90348	0.1372	0.0084	0.07147		97.1642	4.94062	0.0508482					89.0494	5.34793
My_13_tit_84		0.777	0.048	0.0135	0.00069	0.60611	74.0741	3.78601	0.419	0.012	-0.014185		45.9603	2.71965	0.059174					89.4193	4.56864
My_13_tit_85		0.498	0.033	0.01277	0.00065	0.72417	78.3085	3.98595	0.28	0.01	-0.35103		57.865	3.12265	0.0539644					90.1996	4.57016
My_13_tit_86		1.625	0.1	0.02158	0.0013	0.38439	46.3392	2.79152	0.543	0.02	0.57033		51.7807	4.76408	0.0920049					90.8995	5.03856
My_13_tit_87		2.257	0.14	0.02725	0.0015	0.6389	36.6972	2.02003	0.611	0.021	0.029266		50.3512	5.54945	0.110215					91.2108	5.96025
My_13_tit_88		0.478	0.028	0.01113	0.00057	0.67385	89.8473	4.60134	0.3101	0.0064	-0.080523		47.7255	2.51777	0.0527553					92.0915	5.41374
My_13_tit_89		1.75	0.25	0.0255	0.0023	0.97397	39.2157	3.5371	0.487	0.03	-0.86246		72.8405	9.03955	0.124101					92.1594	4.73771
My_13_tit_90		0.49	0.029	0.01709	0.00089	0.41987	58.5138	3.04724	0.2037	0.0071	0.30858		87.9184	4.66612	0.0530733					93.0336	5.82804
My_13_tit_91		0.789	0.06	0.0203	0.0011	0.69573	49.2611	2.66932	0.279	0.013	-0.28866		92.0915	5.41374	0.0587866					93.2907	5.03903
My_13_tit_92		1.108	0.068	0.01557	0.00085	0.64334	64.2261	3.50624	0.52	0.018	0.24747		40.2316	3.2188	0.0800066					93.6023	9.73318
My_13_tit_93		0.737	0.047	0.01115	0.00056	0.12849	89.6861	4.50441	0.476	0.02	0.37799		32.7839	2.47898	0.0756156					94.7219	4.88062
My_13_tit_94		2.9	0.29	0.0389	0.0026	0.92053	25.7069	1.7182	0.531	0.027	-0.7332		97.461	10.7454	0.110253					96.2265	4.917
My_13_tit_95		0.918	0.054	0.01448	0.00077	0.3967	69.0608	3.67243	0.464	0.015	0.40827		44.0062	2.96856	0.0674578					96.8666	5.33219
My_13_tit_96		0.343	0.021	0.01076	0.00057	0.5164	92.9368	4.92323	0.2293	0.0073	0.22644		53.1836	2.88521	0.05425					97.1642	4.94062
My_13_tit_97		3.59	0.36	0.0442	0.0035	0.95069	22.6244	1.79153	0.579	0.017	-0.55609		93.6023	9.73318	0.103984					97.2701	4.93533
My_13_tit_98		0.505	0.036	0.01527	0.00081	0.73088	65.4879	3.47382	0.2386	0.0084	-0.29611		74.2823	4.06625	0.0547405					97.3984	5.66954
My_13_tit_99		0.564	0.034	0.01944	0.001	0.31779	51.4403	2.64611	0.2086	0.0075	0.45269		99.2041	5.2163	0.0525815					97.461	10.7454
My_13_tit_100		0.581	0.033	0.01209	0.00064	0.40503	82.713	4.37852	0.3458	0.0097	0.36705		48.3405	2.74066	0.0566948					98.1241	5.40454
My_13_tit_101		0.1929	0.012	0.00802	0.00044	0.65886	124.688	6.84075	0.1753	0.0045	0.097398		43.1672	2.38253	0.0551931					99.2041	5.2163
My_13_tit_102		0.606	0.041	0.01862	0.001	0.58536	53.7057	2.8843	0.2362	0.0087	0.028911		90.8995	5.03856	0.0554301					100.525	5.97504
My_13_tit_103		0.726	0.043	0.02084	0.0011	0.39148	47.9846	2.53278	0.2576	0.0095	0.38179		98.1241	5.40454	0.0550786					100.539	4.98167
My_13_tit_104		1.85	0.15	0.0317	0.0019	0.62459	31.5457	1.89075	0.426	0.019	0.0074655		106.265	8.02475	0.0755165					100.936	5.89772
My_13_tit_105		0.1809	0.011	0.00885	0.00045	0.52218	112.994	5.74547	0.1501	0.0048	0.23276		49.4324	2.53162	0.0512137					101.302	5.22752
My_13_tit_106		0.829	0.052	0.01194	0.00075	0.90996	83.7521	5.26081	0.528	0.026	-0.17233		30.0539	3.18571	0.106					101.475	5.13492
My_13_tit_107		0.82	0.23	0.0217	0.0022	0.9759	46.0829	4.672	0.242	0.045	-0.934		104.883	13.1564	0.125439					101.651	5.69039
My_13_tit_108		1.607	0.11	0.02402	0.0014	0.92328	41.632	2.42651	0.4801	0.0096	-0.39533		69.9435	4.55393	0.0651087					104.853	5.27042
My_13_tit_109		0.377	0.022	0.01681	0.00086	0.51784	59.4884	3.04343	0.1617	0.0047	0.089341		92.1594	4.73771	0.0514077					104.883	13.1564
My_13_tit_110		1.408	0.079	0.01644	0.0009	0.58119	60.8273	3.32996	0.62	0.017	0.43043		29.0773	2.88675	0.0992782					105.658	5.70362
My_13_tit_111		0.95	0.062	0.02389	0.0012	0.50594	41.8585	2.10256	0.293	0.011	0.1008		105.658	5.70362	0.0539817					106.018	7.14922
My_13_tit_112		1.133	0.084	0.01641	0.001	0.83677	60.9385	3.71349	0.5	0.015	-0.18178		45.0795	3.44795	0.076486					106.265	8.02475
My_13_tit_113		0.468	0.029	0.01978	0.0011	0.44894	50.5561	2.81151	0.1689	0.0056	0.3486		107.233	5.9996	0.0559491					107.233	5.9996
My_13_tit_114		0.1389	0.0084	0.00912	0.00048	0.55997	109.649	5.77101	0.1099	0.0037	0.11037		53.9029	2.84249	0.0527335					109.745	20.9265
My_13_tit_115		1.168	0.077	0.01912	0.0012	0.57144	52.3013	3.28251	0.446	0.016	0.34868		60.932	4.58847	0.0753048					139.319	7.02474
My_13_tit_116		1.52	0.3	0.0197	0.0026	0.99583	50.7614	6.69948	0.529	0.028	-0.8929		49.4975	7.93883	0.160389					189.201	16.8868
My_13_tit_117		0.717	0.047	0.01351	0.00076	0.673	74.0192	4.16392	0.384	0.01	0.12092		49.8326	3.02717	0.0607467
My_13_tit_118		6.97	0.95	0.064	0.0082	0.98457	15.625	2.00195	0.781	0.02	-0.30841		29.4077	11.7686	0.400188
My_13_tit_119		0.374	0.023	0.01074	0.00056	0.39423	93.1099	4.85489	0.2499	0.0087	0.29439		51.2936	2.77854	0.0541693
My_13_tit_120		2.266	0.14	0.0287	0.0017	0.33798	34.8432	2.06388	0.579	0.023	0.66762		60.5487	6.54832	0.10815
My_13_tit_121		1.92	0.32	0.025	0.0027	0.96132	40	4.32	0.519	0.042	-0.80418		64.9094	11.0251	0.169854
My_13_tit_122		1.105	0.066	0.01406	0.00077	0.2756	71.1238	3.89511	0.569	0.023	0.58876		30.7047	3.17932	0.103545
My_13_tit_123		1.04	0.071	0.0233	0.0012	0.67692	42.9185	2.21039	0.326	0.01	-0.083135		96.8666	5.33219	0.0550468
My_13_tit_124		2.99	0.18	0.0323	0.0018	0.6039	30.9598	1.72531	0.652	0.022	0.27878		48.9283	6.57646	0.13441
My_13_tit_125		1.273	0.071	0.0261	0.0014	0.41541	38.3142	2.05517	0.362	0.011	0.59349		100.936	5.89772	0.0584304
My_13_tit_126		1.626	0.13	0.02196	0.0012	0.90377	45.5373	2.48838	0.538	0.017	-0.42896		53.5906	4.29947	0.080228
My_13_tit_127		0.414	0.028	0.01678	0.00085	0.70101	59.5948	3.0188	0.1808	0.0053	-0.24938		89.4193	4.56864	0.0510923

## Sheet: My17 zircon
	Final207_235	Final207_235_Int2SE	Final206_238	Final206_238_Int2SE	ErrorCorrelation_6_38vs7_35		Final206_238	Final206_238_Int2SE	Final207_206	Final207_206_Int2SE	ErrorCorrelation_38_6vs7_6		FinalAge206_238	FinalAge206_238_Int2SE	FinalAge207_206	FinalAge207_206_Int2SE		CONCORDIA CALCULATION													Concordia Age	+/-2s
My17_1	0.0495	0.0044	0.00692	0.00029	0.040626		0.00692	0.00029	0.0504	0.0048	0.30818		44.4	1.9	150	160		Concordia Age	+/-2s	MSWD	probability of concordance		0.1	Concordia Age	+/-2s	MSWD	probability of concordance				26.4637	1.72237
My17_2	0.0675	0.0057	0.01016	0.00037	0.21011		0.01016	0.00037	0.0489	0.0042	0.29374		65.2	2.4	150	150							0.1 = 10% threshold of discordancy	45.1395	1.72764	4.03294	0.0446201				26.9016	0.750169
My17_3	0.65	0.018	0.0809	0.0025	0.77199		0.0809	0.0025	0.0583	0.0011	0.48697		501	15	531	43		65.278	2.30191	0.181395	0.670177			65.278	2.30191	0.181395	0.670177				28.0717	0.733315
My17_4	0.0447	0.0012	0.00687	0.00017	0.49566		0.00687	0.00017	0.0473	0.0012	0.45789		44.1	1.1	74	51		508.805	11.0861	2.15306	0.142286			508.805	11.0861	2.15306	0.142286				28.8188	0.732342
My17_5	0.087	0.0074	0.0129	0.00046	0.17209		0.0129	0.00046	0.0503	0.004	0.26659		82.6	2.9	280	150		44.2506	0.972805	0.220669	0.638531			44.2506	0.972805	0.220669	0.638531				30.4568	0.826087
My17_6	0.0732	0.007	0.01056	0.00044	0.153		0.01056	0.00044	0.0507	0.0051	0.44854		67.7	2.8	200	180		82.8405	2.83823	0.348994	0.554683			82.8405	2.83823	0.348994	0.554683				31.5991	0.952566
My17_7	0.1693	0.0087	0.02469	0.00076	0.31723		0.02469	0.00076	0.0494	0.0027	0.35121		157.2	4.8	160	100		68.1534	2.70866	1.39492	0.237576			68.1534	2.70866	1.39492	0.237576				38.9512	1.58716
My17_8	0.0847	0.0048	0.01329	0.00044	0.077226		0.01329	0.00044	0.0465	0.003	0.42366		85.1	2.8	80	120		157.545	4.53971	0.175263	0.675476			157.545	4.53971	0.175263	0.675476				40.3932	0.932701
My17_9	0.608	0.024	0.0783	0.0025	0.40707		0.0783	0.0025	0.0566	0.0022	0.35865		486	15	487	79		84.4344	2.4555	1.00118	0.317024			84.4344	2.4555	1.00118	0.317024				40.6526	0.824483
My17_10	0.653	0.015	0.0814	0.0025	0.65562		0.0814	0.0025	0.0583	0.0013	0.53619		504	15	538	51		484.171	12.6198	0.200144	0.654604			484.171	12.6198	0.200144	0.654604				42.3131	1.29639
My17_11	0.0676	0.0034	0.01019	0.00029	0.12074		0.01019	0.00029	0.0481	0.0026	0.43969		65.4	1.8	110	100		510.534	9.22932	1.0726	0.30036			510.534	9.22932	1.0726	0.30036				42.9333	0.842275
My17_12	0.0725	0.0046	0.01118	0.00039	0.079106		0.01118	0.00039	0.0484	0.0035	0.38623		71.6	2.5	120	130		65.5874	1.68578	0.362736	0.546991			65.5874	1.68578	0.362736	0.546991				44.2506	0.972805
My17_13	0.0736	0.0061	0.01096	0.0004	0.057264		0.01096	0.0004	0.0508	0.0046	0.41099		70.3	2.5	180	160		71.5341	2.23042	0.0618269	0.803631			71.5341	2.23042	0.0618269	0.803631				44.3052	1.30901
My17_14	0.0558	0.0077	0.00817	0.0004	-0.01081		0.00817	0.0004	0.0471	0.0067	0.35226		52.4	2.6	60	240		70.5416	2.38129	0.355427	0.551057			70.5416	2.38129	0.355427	0.551057				44.627	0.958869
My17_15	0.0599	0.0051	0.00878	0.00032	0.18552		0.00878	0.00032	0.0517	0.0046	0.30499		56.4	2.1	240	170		52.7451	2.41043	0.46422	0.495658			52.7451	2.41043	0.46422	0.495658				44.7529	1.6107
My17_16	0.0832	0.0055	0.01241	0.00036	0.22939		0.01241	0.00036	0.048	0.0032	0.21916		79.5	2.3	160	120		56.6112	1.99087	1.20974	0.271383			56.6112	1.99087	1.20974	0.271383				44.83	0.856455
My17_17	0.0287	0.0019	0.00435	0.00012	0.088222		0.00435	0.00012	0.0494	0.0036	0.28929		27.95	0.77	120	130		79.6655	2.23981	0.407156	0.523416			79.6655	2.23981	0.407156	0.523416				45.7088	0.800992
My17_18	0.128	0.011	0.01851	0.00074	0.29799		0.01851	0.00074	0.0495	0.0042	0.27397		118.2	4.7	190	150		28.0717	0.733315	0.582984	0.445145			28.0717	0.733315	0.582984	0.445145				46.7476	1.86514
My17_19	0.1003	0.0072	0.00925	0.00036	0.19363		0.00925	0.00036	0.0785	0.0058	0.3221		59.4	2.3	1070	160		118.586	4.60957	0.713692	0.398221			118.586	4.60957	0.713692	0.398221				47.6783	1.33643
My17_20	0.0864	0.0052	0.01349	0.00037	0.072119		0.01349	0.00037	0.0456	0.0028	0.3557		86.4	2.3	30	110								61.1887	2.27648	126.312	2.62715e-29				48.1765	1.28697
My17_21	0.0722	0.007	0.01038	0.00037	0.072366		0.01038	0.00037	0.0514	0.0053	0.38967		66.5	2.4	200	180		85.9962	2.17592	0.727832	0.393587			85.9962	2.17592	0.727832	0.393587				48.5995	1.56067
My17_22	0.0503	0.0036	0.00813	0.00032	0.078318		0.00813	0.00032	0.0461	0.0037	0.43087		52.2	2	60	150		66.963	2.27219	1.49921	0.220793			66.963	2.27219	1.49921	0.220793				49.1011	1.09269
My17_23	0.0273	0.0013	0.00417	0.00012	0.38104		0.00417	0.00012	0.0468	0.0021	0.31381		26.82	0.8	62	86		51.6302	1.82187	1.47671	0.22429			51.6302	1.82187	1.47671	0.22429				50.6153	1.19518
My17_24	0.0753	0.0039	0.01188	0.00035	0.3055		0.01188	0.00035	0.0471	0.0025	0.27972		76.1	2.2	74	98		26.9016	0.750169	0.73199	0.392239			26.9016	0.750169	0.73199	0.392239				51.6302	1.82187
My17_25	0.1204	0.0054	0.01756	0.00083	0.64688		0.01756	0.00083	0.0508	0.002	0.46037		112.2	5.3	221	85		75.6893	2.1272	1.72726	0.188761			75.6893	2.1272	1.72726	0.188761				52.7451	2.41043
My17_26	0.0428	0.0029	0.00658	0.00021	0.20404		0.00658	0.00021	0.0487	0.0035	0.35883		42.3	1.4	110	130		114.143	4.59063	2.25714	0.133			114.143	4.59063	2.25714	0.133				54.6075	1.19204
My17_27	0.0288	0.0011	0.00448	0.00012	0.41091		0.00448	0.00012	0.0463	0.0017	0.32113		28.82	0.76	40	71		42.3131	1.29639	0.0368828	0.847704			42.3131	1.29639	0.0368828	0.847704				54.659	1.52811
My17_28	0.0679	0.0048	0.01039	0.00031	0.2206		0.01039	0.00031	0.0476	0.0036	0.3261		66.6	2	70	130		28.8188	0.732342	0.000763995	0.977949			28.8188	0.732342	0.000763995	0.977949				55.701	1.36437
My17_29	0.0571	0.0024	0.00869	0.00027	0.40213		0.00869	0.00027	0.0478	0.002	0.36547		55.8	1.7	93	81		66.6394	1.93351	0.000998096	0.974797			66.6394	1.93351	0.000998096	0.974797				55.9413	1.61478
My17_30	0.1036	0.0043	0.01523	0.00039	0.087998		0.01523	0.00039	0.049	0.0019	-0.03876		97.4	2.5	142	78		55.9413	1.61478	0.288003	0.591503			55.9413	1.61478	0.288003	0.591503				56.0579	1.28941
My17_31	0.07	0.0039	0.01054	0.00031	0.0065637		0.01054	0.00031	0.0474	0.0029	0.44655		67.6	2	60	110		98.135	2.18154	1.40184	0.236416			98.135	2.18154	1.40184	0.236416				56.6112	1.99087
My17_32	0.0309	0.0061	0.00409	0.00027	0.17452		0.00409	0.00027	0.051	0.012	0.70007		26.3	1.8	150	340		67.8343	1.75022	0.280939	0.596086			67.8343	1.75022	0.280939	0.596086				56.8977	1.83995
My17_33	1.251	0.031	0.135	0.0038	0.67291		0.135	0.0038	0.0679	0.0015	0.50258		816	22	878	46		26.4637	1.72237	2.3641	0.124155			26.4637	1.72237	2.3641	0.124155				57.3527	1.79436
My17_34	0.0879	0.0073	0.01388	0.00044	0.16389		0.01388	0.00044	0.0484	0.0041	0.21868		88.8	2.8	150	150		824.035	14.0207	0.882713	0.34746			824.035	14.0207	0.882713	0.34746				57.4972	1.44163
My17_35	0.797	0.04	0.0973	0.0026	0.51937		0.0973	0.0026	0.0587	0.0028	-0.016848		599	15	550	110		88.5337	2.71471	0.91812	0.337969			88.5337	2.71471	0.91812	0.337969				58.7976	1.99706
My17_36	0.0437	0.0013	0.00658	0.00019	0.40018		0.00658	0.00019	0.047	0.0015	0.4894		42.3	1.2	60	63		598.077	15.0301	0.122132	0.726734			598.077	15.0301	0.122132	0.726734				59.098	1.40836
My17_37	0.0596	0.0027	0.00891	0.00024	0.23791		0.00891	0.00024	0.0474	0.0023	0.33029		57.2	1.5	103	95								42.8164	1.03822	2.86048	0.0907805				59.9076	2.88569
My17_38	0.1762	0.0068	0.02603	0.00061	0.29724		0.02603	0.00061	0.0494	0.0019	0.29601		165.6	3.8	168	78		57.4972	1.44163	1.42512	0.232563			57.4972	1.44163	1.42512	0.232563				60.0107	1.80169
My17_39	0.1209	0.0089	0.01739	0.00056	0.28118		0.01739	0.00056	0.0513	0.0037	0.27356		111.1	3.6	220	140		165.459	3.59404	0.0840957	0.771822			165.459	3.59404	0.0840957	0.771822				60.0845	2.15777
My17_40	0.0899	0.0042	0.01382	0.00041	0.10496		0.01382	0.00041	0.0471	0.0025	0.50873		88.5	2.6	91	96		111.487	3.50331	1.4595	0.22701			111.487	3.50331	1.4595	0.22701				61.0603	2.1408
My17_41	0.0929	0.0033	0.01438	0.00041	0.34913		0.01438	0.00041	0.047	0.0017	0.40465		92	2.6	62	70		88.1724	2.27117	0.228901	0.63234			88.1724	2.27117	0.228901	0.63234				63.4971	3.173
My17_42	0.0457	0.0023	0.00694	0.00026	0.52145		0.00694	0.00026	0.0477	0.0019	0.23466		44.6	1.6	102	80		91.345	2.29853	1.27133	0.259518			91.345	2.29853	1.27133	0.259518				64.3921	1.96032
My17_43	0.0534	0.003	0.00784	0.00022	0.2575		0.00784	0.00022	0.0497	0.0028	0.28122		50.3	1.4	160	110		44.7529	1.6107	0.642425	0.422834			44.7529	1.6107	0.642425	0.422834				64.9367	1.83112
My17_44	13.63	0.96	0.524	0.033	0.83206		0.524	0.033	0.1925	0.0074	0.27346		2710	140	2756	63								50.6224	1.37036	2.97596	0.0845101				65.278	2.30191
My17_45	0.0686	0.0037	0.01012	0.00032	0.14015		0.01012	0.00032	0.0499	0.0027	0.4028		64.9	2	170	100		2727.54	56.1729	0.0319973	0.858034			2727.54	56.1729	0.0319973	0.858034				65.4448	1.86726
My17_46	0.0625	0.0043	0.01011	0.00032	0.21093		0.01011	0.00032	0.0447	0.0031	0.24871		64.8	2	-10	110		65.4448	1.86726	1.66368	0.197108			65.4448	1.86726	1.66368	0.197108				65.5874	1.68578
My17_47	0.0583	0.0019	0.00843	0.00025	0.45673		0.00843	0.00025	0.0508	0.0017	0.41401		54.1	1.6	219	70		64.3921	1.96032	2.47406	0.115739			64.3921	1.96032	2.47406	0.115739				65.9075	2.7842
My17_48	0.0956	0.008	0.01196	0.00047	0.25		0.01196	0.00047	0.0586	0.0048	0.2757		76.6	3	510	160								55.411	1.44692	14.489	0.000140984				66.6394	1.93351
My17_49	0.0762	0.0068	0.01127	0.00036	0.065959		0.01127	0.00036	0.0485	0.0045	0.20199		72.2	2.3	150	180								77.6352	2.9603	19.263	1.13893e-05				66.963	2.27219
My17_50	0.0449	0.0015	0.00695	0.00019	0.05353		0.00695	0.00019	0.0473	0.0017	0.38287		44.7	1.2	73	67		72.4684	2.20414	0.483415	0.48688			72.4684	2.20414	0.483415	0.48688				67.1392	1.95498
My17_51	0.76	0.021	0.0931	0.0023	0.59067		0.0931	0.0023	0.0588	0.0013	0.35304		573	14	569	49		44.627	0.958869	0.00301543	0.956208			44.627	0.958869	0.00301543	0.956208				67.5934	1.92608
My17_52	0.0518	0.0044	0.00753	0.00025	0.15152		0.00753	0.00025	0.0489	0.0042	0.32023		48.4	1.6	180	160		573.95	11.3576	0.000792483	0.977542			573.95	11.3576	0.000792483	0.977542				67.8343	1.75022
My17_53	2.008	0.065	0.1908	0.0063	0.56263		0.1908	0.0063	0.0771	0.0025	0.49489		1124	34	1122	65		48.5995	1.56067	1.83449	0.175599			48.5995	1.56067	1.83449	0.175599				67.9059	2.84965
My17_54	0.0304	0.0019	0.00493	0.00015	0.37882		0.00493	0.00015	0.0449	0.0026	0.072609		31.68	0.98	0	100		1118.79	21.8734	0.278121	0.597935			1118.79	21.8734	0.278121	0.597935				67.9999	1.6123
My17_55	0.113	0.015	0.01655	0.00074	0.12971		0.01655	0.00074	0.0504	0.0073	0.25259		105.8	4.7	160	250		31.5991	0.952566	2.18774	0.139113			31.5991	0.952566	2.18774	0.139113				68.1534	2.70866
My17_56	0.0573	0.0044	0.00817	0.00021	0.20594		0.00817	0.00021	0.0514	0.004	0.16469		52.4	1.3	230	150		106.019	4.58976	0.173106	0.677366			106.019	4.58976	0.173106	0.677366				68.6602	1.83298
My17_57	0.0606	0.0036	0.00883	0.00031	0.10761		0.00883	0.00031	0.0513	0.0033	0.42754		56.7	2	270	120								52.603	1.33536	3.90779	0.0480627				68.8728	1.65441
My17_58	0.0608	0.002	0.00907	0.00031	0.04482		0.00907	0.00031	0.0484	0.0016	0.5531		58.2	2	118	64		57.3527	1.79436	2.62003	0.105522			57.3527	1.79436	2.62003	0.105522				68.8755	1.49787
My17_59	0.0681	0.0025	0.00864	0.00026	0.43596		0.00864	0.00026	0.0564	0.002	0.29988		55.4	1.7	471	75		59.098	1.40836	1.64118	0.200163			59.098	1.40836	1.64118	0.200163				69.3232	3.0031
My17_60	0.0452	0.0016	0.00684	0.00022	0.58155		0.00684	0.00022	0.0474	0.0014	0.34072		43.9	1.4	76	61								57.7952	1.59822	104.415	1.64122e-24				69.6843	2.31727
My17_61	0.0666	0.0024	0.01009	0.0003	0.58964		0.01009	0.0003	0.048	0.0015	0.32434		64.7	1.9	103	63		44.3052	1.30901	1.92022	0.165832			44.3052	1.30901	1.92022	0.165832				70.5416	2.38129
My17_62	0.0736	0.0033	0.01072	0.00025	-0.12611		0.01072	0.00025	0.0498	0.0024	0.14462		68.8	1.6	161	92		64.9367	1.83112	0.600613	0.438344			64.9367	1.83112	0.600613	0.438344				70.6059	2.45858
My17_63	0.0681	0.0045	0.00887	0.00026	0.17257		0.00887	0.00026	0.0563	0.0037	0.23466		56.9	1.7	420	130								69.5259	1.34378	3.34972	0.0672165				70.8175	1.50124
My17_64	7.64	0.22	0.072	0.0024	0.45398		0.072	0.0024	0.762	0.024	0.67256		450	14	4874	54								57.7345	1.62486	21.1691	4.20491e-06				71.1867	2.09565
My17_65	0.0761	0.0055	0.01112	0.0003	0.13348		0.01112	0.0003	0.0495	0.0037	0.27346		71.3	1.9	200	140								260.965	13.7356	4489.33	0				71.5341	2.23042
My17_66	0.534	0.028	0.0552	0.0028	0.90307		0.0552	0.0028	0.072	0.0015	0.050347		346	17	986	42		71.5533	1.86274	1.44594	0.22918			71.5533	1.86274	1.44594	0.22918				71.5533	1.86274
My17_67	0.0576	0.0035	0.00796	0.00022	0.075817		0.00796	0.00022	0.0497	0.0031	0.33809		51.1	1.4	220	130								314.628	16.9145	437.148	4.52076e-97				72.1208	2.43045
My17_68	0.0788	0.0049	0.00992	0.00028	0.16922		0.00992	0.00028	0.0568	0.0035	0.26092		63.6	1.8	490	120								51.8486	1.33216	10.4948	0.00119711				72.4684	2.20414
My17_69	0.0483	0.003	0.00721	0.00032	0.26629		0.00721	0.00032	0.05	0.0033	0.36069		46.3	2.1	180	130								64.7178	1.7476	32.6692	1.09257e-08				72.5551	1.8994
My17_70	0.0494	0.0036	0.00441	0.00013	0.411		0.00441	0.00013	0.0796	0.0053	0.069616		28.36	0.82	1100	130		46.7476	1.86514	1.05772	0.303736			46.7476	1.86514	1.05772	0.303736				75.6893	2.1272
My17_71	0.0751	0.0048	0.01131	0.0003	0.30424		0.01131	0.0003	0.048	0.003	0.14578		72.5	1.9	110	120								27.3687	0.819851	158.884	1.98389e-36				79.6655	2.23981
My17_72	0.0638	0.0081	0.00991	0.00051	0.19549		0.00991	0.00051	0.0458	0.0058	0.09753		63.6	3.3	40	220		72.5551	1.8994	0.222831	0.636891			72.5551	1.8994	0.222831	0.636891				80.1372	2.23598
My17_73	0.18	0.02	0.0264	0.0012	0.0085424		0.0264	0.0012	0.0453	0.006	0.53575		167.8	7.8	100	200		63.4971	3.173	0.0392668	0.842921			63.4971	3.173	0.0392668	0.842921				81.8201	1.72979
My17_74	0.0557	0.0025	0.0085	0.00025	0.37965		0.0085	0.00025	0.0484	0.0022	0.2271		54.6	1.6	118	87		167.991	6.92707	7.83414e-05	0.992938			167.991	6.92707	7.83414e-05	0.992938				82.8405	2.83823
My17_75	0.095	0.0055	0.00829	0.00026	0.29233		0.00829	0.00026	0.0831	0.0048	0.32778		53.2	1.7	1210	110		54.659	1.52811	0.166202	0.683509			54.659	1.52811	0.166202	0.683509				84.2714	2.12399
My17_76	0.1485	0.0087	0.02243	0.00063	0.24769		0.02243	0.00063	0.0487	0.0029	0.24432		142.9	4	140	110								53.5179	1.66277	245.08	3.07038e-55				84.4344	2.4555
My17_77	0.127	0.011	0.01834	0.00071	-0.090765		0.01834	0.00071	0.0502	0.0048	0.46615		117.1	4.5	160	170		142.662	3.82908	0.388334	0.533176			142.662	3.82908	0.388334	0.533176				85.7127	4.36125
My17_78	0.071	0.0027	0.01063	0.00032	0.33369		0.01063	0.00032	0.05	0.002	0.44776		68.1	2	183	84		117.966	3.94753	0.567314	0.451328			117.966	3.94753	0.567314	0.451328				85.9962	2.17592
My17_79	0.163	0.02	0.01615	0.0006	0.55597		0.01615	0.0006	0.0695	0.0068	-0.1351		103.3	3.8	740	180		68.6602	1.83298	1.21534	0.270277			68.6602	1.83298	1.21534	0.270277				86.9222	3.17849
My17_80	0.1043	0.0088	0.01468	0.00049	0.09619		0.01468	0.00049	0.0525	0.0046	0.30948		93.9	3.1	280	160								98.7044	3.51358	38.4973	5.48297e-10				88.1724	2.27117
My17_81	0.0985	0.0055	0.01494	0.00045	0.083457		0.01494	0.00045	0.0489	0.0031	0.3505		95.6	2.8	140	120		94.6411	2.99291	2.60944	0.10623			94.6411	2.99291	2.60944	0.10623				88.5337	2.71471
My17_82	0.0815	0.0049	0.01253	0.00038	0.11418		0.01253	0.00038	0.0473	0.003	0.39652		80.3	2.4	80	120		95.5516	2.57761	0.00538508	0.941501			95.5516	2.57761	0.00538508	0.941501				91.345	2.29853
My17_83	0.0554	0.0032	0.0089	0.0003	0.45718		0.0089	0.0003	0.0462	0.0025	0.22257		57.1	1.9	40	100		80.1372	2.23598	0.0841064	0.771808			80.1372	2.23598	0.0841064	0.771808				93.1266	2.06368
My17_84	0.0434	0.0012	0.00667	0.00014	0.43692		0.00667	0.00014	0.0474	0.0013	0.29465		42.87	0.89	79	55								56.8177	1.8849	2.89808	0.0886851				93.2544	2.49889
My17_85	0.0614	0.0046	0.00934	0.0003	0.072791		0.00934	0.0003	0.0476	0.0038	0.41129		59.9	1.9	90	140		42.9333	0.842275	0.255198	0.613439			42.9333	0.842275	0.255198	0.613439				94.6411	2.99291
My17_86	0.103	0.011	0.0154	0.00073	-0.055126		0.0154	0.00073	0.049	0.0055	0.50486		98.5	4.6	140	210		60.0107	1.80169	0.060666	0.805446			60.0107	1.80169	0.060666	0.805446				95.5516	2.57761
My17_87	0.063	0.0079	0.00931	0.00046	0.20012		0.00931	0.00046	0.0498	0.0067	0.31337		59.7	2.9	240	240		98.7087	4.1241	0.0324162	0.857117			98.7087	4.1241	0.0324162	0.857117				95.9073	3.51976
My17_88	0.0408	0.0011	0.00633	0.00014	0.45178		0.00633	0.00014	0.0475	0.0012	0.42394		40.65	0.91	82	54		59.9076	2.88569	0.371241	0.542329			59.9076	2.88569	0.371241	0.542329				98.135	2.18154
My17_89	0.0707	0.0031	0.01057	0.00026	0.33282		0.01057	0.00026	0.0482	0.0019	0.23542		67.8	1.7	119	78		40.6526	0.824483	0.019205	0.889781			40.6526	0.824483	0.019205	0.889781				98.7087	4.1241
My17_90	0.0686	0.0069	0.01061	0.0005	-0.016473		0.01061	0.0005	0.0462	0.005	0.46329		68	3.2	30	180		67.9999	1.6123	1.22593	0.268201			67.9999	1.6123	1.22593	0.268201				106.019	4.58976
My17_91	0.902	0.018	0.1065	0.0023	0.56084		0.1065	0.0023	0.0614	0.0012	0.55481		652	13	658	44		67.9059	2.84965	0.0329667	0.855922			67.9059	2.84965	0.0329667	0.855922				111.487	3.50331
My17_92	0.678	0.026	0.0833	0.0027	0.3591		0.0833	0.0027	0.0586	0.0023	0.2788		518	17	532	82		652.73	9.47301	0.00513654	0.942865			652.73	9.47301	0.00513654	0.942865				114.143	4.59063
My17_93	0.0488	0.0018	0.00738	0.00022	0.52395		0.00738	0.00022	0.0472	0.0015	0.27913		47.4	1.4	79	64		520.8	13.1387	1.174	0.27858			520.8	13.1387	1.174	0.27858				117.429	4.16973
My17_94	0.0709	0.0062	0.01114	0.00035	0.012799		0.01114	0.00035	0.0456	0.0045	0.3577		71.4	2.2	20	160		47.6783	1.33643	1.56345	0.21116			47.6783	1.33643	1.56345	0.21116				117.9	3.59684
My17_95	0.0504	0.003	0.00733	0.00028	0.15152		0.00733	0.00028	0.051	0.0033	0.34247		47	1.8	240	120		71.1867	2.09565	0.354456	0.551601			71.1867	2.09565	0.354456	0.551601				117.966	3.94753
My17_96	0.0654	0.0083	0.0103	0.00045	0.1118		0.0103	0.00045	0.0481	0.0061	0.34269		66	2.9	60	210								47.7649	1.62178	3.22129	0.0726864				118.586	4.60957
My17_97	0.1001	0.0063	0.01452	0.0004	0.25236		0.01452	0.0004	0.0506	0.0031	0.28578		92.9	2.5	220	120		65.9075	2.7842	0.183092	0.66873			65.9075	2.7842	0.183092	0.66873				126.868	3.04253
My17_98	1.422	0.042	0.149	0.0037	0.5003		0.149	0.0037	0.0702	0.0018	0.35986		894	21	933	57		93.2544	2.49889	1.88449	0.169825			93.2544	2.49889	1.88449	0.169825				142.662	3.82908
My17_99	0.0492	0.0017	0.00745	0.00022	0.46063		0.00745	0.00022	0.048	0.0016	0.41877		47.8	1.4	103	67		897.229	16.3699	0.085786	0.769604			897.229	16.3699	0.085786	0.769604				157.545	4.53971
My17_100	0.1224	0.0051	0.01841	0.00072	0.65337		0.01841	0.00072	0.0484	0.0016	0.40624		117.6	4.6	118	67		48.1765	1.28697	1.31832	0.250894			48.1765	1.28697	1.31832	0.250894				165.459	3.59404
My17_101	0.0913	0.0091	0.01358	0.0005	0.41422		0.01358	0.0005	0.0471	0.0048	0.0065091		87	3.2	70	190		117.429	4.16973	0.0342375	0.853202			117.429	4.16973	0.0342375	0.853202				165.815	4.85078
My17_102	0.0653	0.0061	0.00944	0.00036	0.0018156		0.00944	0.00036	0.0501	0.0049	0.38724		60.5	2.3	170	190		86.9222	3.17849	0.207907	0.648413			86.9222	3.17849	0.207907	0.648413				167.991	6.92707
My17_103	0.0631	0.0014	0.00941	0.00021	0.48192		0.00941	0.00021	0.0483	0.0012	0.55609		60.5	1.4	113	51		61.0603	2.1408	1.36898	0.241987			61.0603	2.1408	1.36898	0.241987				178.799	4.29929
My17_104	0.0537	0.0025	0.00788	0.00022	0.15854		0.00788	0.00022	0.0506	0.0025	0.43612		50.6	1.4	208	98								61.2563	1.15436	6.57544	0.0103395				457.645	8.33442
My17_105	0.1033	0.0084	0.00899	0.00029	0.11142		0.00899	0.00029	0.0853	0.007	0.21614		57.7	1.8	1220	170								51.138	1.29347	3.75759	0.0525684				484.171	12.6198
My17_106	0.0709	0.0063	0.01104	0.00041	0.076598		0.01104	0.00041	0.0472	0.0044	0.30151		70.8	2.6	40	160								58.8692	1.8404	113.746	1.48099e-26				508.805	11.0861
My17_107	0.0708	0.0081	0.01081	0.00048	0.20367		0.01081	0.00048	0.0486	0.0055	0.23679		69.3	3.1	110	200		70.6059	2.45858	0.149748	0.698776			70.6059	2.45858	0.149748	0.698776				510.534	9.22932
My17_108	0.0314	0.0022	0.00471	0.00014	-0.014235		0.00471	0.00014	0.047	0.0039	0.39721		30.32	0.91	110	140		69.3232	3.0031	0.00146073	0.969513			69.3232	3.0031	0.00146073	0.969513				520.8	13.1387
My17_109	0.0702	0.0026	0.01074	0.00029	0.26647		0.01074	0.00029	0.0482	0.0019	0.31109		68.8	1.8	110	78		30.4568	0.826087	0.872641	0.350225			30.4568	0.826087	0.872641	0.350225				573.95	11.3576
My17_110	0.0529	0.0039	0.00739	0.00036	0.40056		0.00739	0.00036	0.0511	0.0036	0.24334		47.5	2.3	210	140		68.8728	1.65441	0.000321738	0.985689			68.8728	1.65441	0.000321738	0.985689				598.077	15.0301
My17_111	0.0698	0.0024	0.01076	0.00025	0.35702		0.01076	0.00025	0.0455	0.0016	0.22467		69	1.6	14	68								48.171	2.246	7.57496	0.00591846				652.73	9.47301
My17_112	0.0905	0.0062	0.01319	0.00076	0.39602		0.01319	0.00076	0.0491	0.0032	0.35047		84.5	4.8	140	130		68.8755	1.49787	0.18137	0.670199			68.8755	1.49787	0.18137	0.670199				824.035	14.0207
My17_113	0.0501	0.0014	0.00759	0.00019	0.46423		0.00759	0.00019	0.0477	0.0014	0.483		48.7	1.2	90	57		85.7127	4.36125	1.41075	0.234932			85.7127	4.36125	1.41075	0.234932				897.229	16.3699
My17_114	0.075	0.004	0.01101	0.00024	0.20514		0.01101	0.00024	0.0497	0.0027	0.17535		70.6	1.5	180	100		49.1011	1.09269	1.78537	0.181491			49.1011	1.09269	1.78537	0.181491				1118.79	21.8734
My17_115	0.0509	0.0024	0.00789	0.0002	0.17391		0.00789	0.0002	0.0472	0.0023	0.33633		50.7	1.3	85	92		70.8175	1.50124	2.26682	0.132171			70.8175	1.50124	2.26682	0.132171				1879.6	18.4542
My17_116	0.0583	0.0021	0.00867	0.00024	0.58046		0.00867	0.00024	0.0482	0.0014	0.30881		55.6	1.6	125	59		50.6153	1.19518	0.0423983	0.836862			50.6153	1.19518	0.0423983	0.836862				2727.54	56.1729
My17_117	0.1073	0.0085	0.00708	0.00018	0.32488		0.00708	0.00018	0.11	0.008	0.00645		45.5	1.2	1750	140								56.0214	1.49859	5.01471	0.0251328
My17_118	5.28	0.16	0.0564	0.0022	0.43742		0.0564	0.0022	0.702	0.027	0.65634		353	14	4739	63								43.8177	1.13198	225.36	6.12656e-51
My17_119	0.1267	0.0074	0.01833	0.00061	0.19294		0.01833	0.00061	0.0513	0.0032	0.42823		117	3.8	220	120								203.484	12.8833	4035.46	0
My17_120	0.18	0.018	0.01454	0.00049	0.60304		0.01454	0.00049	0.0884	0.0076	-0.28926		93	3.1	1220	150		117.9	3.59684	1.31278	0.251893			117.9	3.59684	1.31278	0.251893
My17_121	0.57	0.013	0.0732	0.0019	0.61894		0.0732	0.0019	0.0578	0.0011	0.55264		455	12	516	43								85.5682	2.76356	107.571	3.33654e-25
My17_122	0.16	0.01	0.00819	0.00025	0.68343		0.00819	0.00025	0.139	0.0067	-0.21107		52.5	1.6	2196	84		457.645	8.33442	0.328879	0.56632			457.645	8.33442	0.328879	0.56632
My17_123	0.077	0.0053	0.01114	0.00041	0.12813		0.01114	0.00041	0.0515	0.0039	0.41286		71.4	2.6	250	150								41.5197	1.30587	569.643	6.71295e-126
My17_124	0.0715	0.0066	0.01086	0.00038	0.080846		0.01086	0.00038	0.0479	0.0046	0.31031		69.6	2.4	80	160		72.1208	2.43045	2.13654	0.143826			72.1208	2.43045	2.13654	0.143826
My17_125	0.0869	0.0041	0.01269	0.00029	0.10739		0.01269	0.00029	0.0493	0.0026	0.31527		81.3	1.9	150	100		69.6843	2.31727	0.0226749	0.880305			69.6843	2.31727	0.0226749	0.880305
My17_126	0.069	0.0037	0.01045	0.00032	0.29109		0.01045	0.00032	0.0481	0.0024	0.10379		67	2.1	76	86		81.8201	1.72979	2.65502	0.103223			81.8201	1.72979	2.65502	0.103223
My17_127	5.37	0.12	0.3392	0.0087	0.69135		0.3392	0.0087	0.1147	0.0021	0.50705		1879	42	1875	33		67.1392	1.95498	0.174601	0.676054			67.1392	1.95498	0.174601	0.676054
My17_128	0.0541	0.0039	0.00779	0.0003	0.034581		0.00779	0.0003	0.0502	0.0036	0.17139		50	1.9	190	130		1879.6	18.4542	0.0292879	0.864116			1879.6	18.4542	0.0292879	0.864116
My17_129	0.0556	0.0041	0.00893	0.00031	0.10556		0.00893	0.00031	0.0454	0.0033	0.27234		57.3	2	0	130								50.7105	1.73375	2.78495	0.0951538
My17_130	0.1081	0.0086	0.01344	0.00048	0.12401		0.01344	0.00048	0.0598	0.0051	0.39382		86	3	560	160		56.8977	1.83995	1.26081	0.261499			56.8977	1.83995	1.26081	0.261499
My17_131	0.1361	0.0055	0.01978	0.0005	0.37856		0.01978	0.0005	0.0498	0.002	0.22956		126.2	3.2	178	81								87.7713	2.9561	19.8611	8.32767e-06
My17_132	0.0951	0.0056	0.01457	0.00034	0.10524		0.01457	0.00034	0.048	0.0029	0.3089		93.2	2.2	110	110		126.868	3.04253	1.93584	0.16412			126.868	3.04253	1.93584	0.16412
My17_133	0.0639	0.0047	0.00924	0.00038	0.024144		0.00924	0.00038	0.0506	0.0047	0.4122		59.3	2.4	190	180		93.1266	2.06368	0.137596	0.710683			93.1266	2.06368	0.137596	0.710683
My17_134	0.055	0.0037	0.0087	0.00022	0.14574		0.0087	0.00022	0.045	0.0031	0.34977		55.8	1.4	10	120		60.0845	2.15777	2.03207	0.154011			60.0845	2.15777	2.03207	0.154011
My17_135	0.056	0.0029	0.00876	0.00022	0.068849		0.00876	0.00022	0.0462	0.0025	0.40908		56.2	1.4	25	98		55.701	1.36437	0.661335	0.416089			55.701	1.36437	0.661335	0.416089
My17_136	0.0631	0.006	0.00912	0.00032	0.1372		0.00912	0.00032	0.0512	0.005	0.2474		58.5	2	220	180		56.0579	1.28941	0.350227	0.553985			56.0579	1.28941	0.350227	0.553985
My17_137	0.0396	0.0025	0.00604	0.00026	0.38704		0.00604	0.00026	0.0475	0.003	0.33725		38.8	1.7	80	120		58.7976	1.99706	1.53317	0.215638			58.7976	1.99706	1.53317	0.215638
My17_138	0.15	0.01	0.01338	0.00061	0.033768		0.01338	0.00061	0.0837	0.0071	0.44384		85.6	3.9	1110	160		38.9512	1.58716	0.269691	0.603539			38.9512	1.58716	0.269691	0.603539
My17_139	10.41	0.22	0.4076	0.0089	0.76867		0.4076	0.0089	0.183	0.0027	0.40534		2204	42	2682	24								93.7512	3.61776	133.952	5.59701e-31
My17_140	0.0457	0.0012	0.00713	0.00013	0.46011		0.00713	0.00013	0.0458	0.0011	0.27038		45.82	0.8	11	48								2542.78	17.1533	359.055	4.52156e-80
My17_141	0.197	0.01	0.02798	0.00074	0.14117		0.02798	0.00074	0.0508	0.0028	0.2826		177.9	4.7	250	110		45.7088	0.800992	0.623469	0.429761			45.7088	0.800992	0.623469	0.429761
My17_142	0.0864	0.0061	0.01316	0.00034	0.18545		0.01316	0.00034	0.0473	0.0033	0.18148		84.2	2.2	120	130		178.799	4.29929	1.06421	0.302257			178.799	4.29929	1.06421	0.302257
My17_143	0.0457	0.0015	0.0069	0.00017	0.53744		0.0069	0.00017	0.048	0.0013	0.26445		44.4	1.1	106	56		84.2714	2.12399	0.00230721	0.96169			84.2714	2.12399	0.00230721	0.96169
My17_144	0.0455	0.0012	0.00696	0.00014	0.49823		0.00696	0.00014	0.048	0.0012	0.41189		44.73	0.92	101	50								44.5448	1.05708	2.72219	0.0989623
My17_145	0.0674	0.0037	0.01059	0.00032	0.23821		0.01059	0.00032	0.0462	0.0025	0.35224		67.9	2.1	44	99		44.83	0.856455	0.777669	0.377855			44.83	0.856455	0.777669	0.377855
My17_146	0.0558	0.0015	0.00846	0.0002	0.56389		0.00846	0.0002	0.0478	0.0013	0.43095		54.3	1.3	94	57		67.5934	1.92608	0.859146	0.353978			67.5934	1.92608	0.859146	0.353978
My17_147	0.099	0.011	0.01499	0.00059	0.0024096		0.01499	0.00059	0.0492	0.0062	0.2764		95.9	3.8	130	220		54.6075	1.19204	1.6622	0.197307			54.6075	1.19204	1.6622	0.197307
My17_148	0.0408	0.0017	0.00628	0.00015	0.3432		0.00628	0.00015	0.0471	0.0019	0.24661		40.35	0.99	75	78		95.9073	3.51976	0.000130406	0.990889			95.9073	3.51976	0.000130406	0.990889
My17_149	0.1811	0.0075	0.02574	0.00088	0.33946		0.02574	0.00088	0.0521	0.0019	0.361		163.8	5.5	283	75		40.3932	0.932701	0.0950936	0.757799			40.3932	0.932701	0.0950936	0.757799
My17_150	8.68	0.31	0.2862	0.0081	0.8515		0.2862	0.0081	0.219	0.0041	-0.17967		1619	41	2966	31		165.815	4.85078	2.22667	0.135646			165.815	4.85078	2.22667	0.135646
																								910.473	32.8903	2327.89	0

[truncated: 4 more sheets: PlotDat17, My17 titanite, PlotDat16, My17 apatite]
